# Supplementary material
Source: publisher figshare collection journal article supplement (https://acs.figshare.com/ndownloader/files/5742591)
Supplement: Supplementary file 1 [file 5742591]

Supporting Information for the Communication entitled

## Enantioselective Synthesis of “Quaternary” 1,4-Benzodiazepine-2-ones via Memory of Chirality

Paul R. Carlier\*, Hongwu Zhao, Joe DeGuzman, Polo C.-H. Lam  
 Department of Chemistry  
 Virginia Tech  
 Blacksburg, VA 24061  
 pcarlier@vt.edu

### Table of Contents:

| Section | Description                                                                                                                                                                             | Page |
|---------|-----------------------------------------------------------------------------------------------------------------------------------------------------------------------------------------|------|
| A       | Experimental Procedures                                                                                                                                                                 | 1    |
| B.      | Tabulation of chiral stationary phase HPLC conditions and retention times                                                                                                               | 8    |
| C.      | Computational Details, Absolute Energies, and Cartesian Coordinates for Calculated Structures                                                                                           | 9    |
| D.      | <sup>1</sup> H and <sup>13</sup> C NMR Spectra, HPLC Chromatograms                                                                                                                      |      |
|         | HPLC chromatograms for <b>2a</b>                                                                                                                                                        | 16   |
|         | HPLC chromatograms for <b>2b</b>                                                                                                                                                        | 18   |
|         | <sup>1</sup> H, <sup>13</sup> C NMR spectra, HPLC chromatograms for <b>2c</b>                                                                                                           | 20   |
|         | HPLC chromatograms for <b>3a</b>                                                                                                                                                        | 24   |
|         | <sup>1</sup> H, <sup>13</sup> C NMR spectra, HPLC chromatograms for <b>3c</b>                                                                                                           | 26   |
|         | <sup>1</sup> H, <sup>13</sup> C NMR spectra, HPLC chromatograms for <b>4</b>                                                                                                            | 30   |
|         | <sup>1</sup> H, <sup>1</sup> H- <sup>1</sup> H COSY, <sup>1</sup> H- <sup>1</sup> H EXSY, <sup>13</sup> C NMR spectra, HPLC chromatograms for <b>5</b> (from (3 <i>S</i> )- <b>2c</b> ) | 34   |
|         | <sup>1</sup> H, <sup>13</sup> C NMR spectra, HPLC chromatograms for <b>6</b>                                                                                                            | 42   |
|         | <sup>1</sup> H, <sup>13</sup> C NMR spectra, HPLC chromatograms for <b>7</b>                                                                                                            | 46   |
|         | <sup>1</sup> H, <sup>13</sup> C NMR spectra, HPLC chromatograms for <b>8</b>                                                                                                            | 50   |
|         | <sup>1</sup> H, <sup>13</sup> C NMR spectra, HPLC chromatograms for <b>9</b>                                                                                                            | 54   |
|         | <sup>1</sup> H, <sup>13</sup> C NMR spectra, HPLC chromatograms for <b>10</b>                                                                                                           | 58   |
|         | <sup>1</sup> H spectrum for <b>11</b> (□-Me-Phe)                                                                                                                                        | 62   |
|         | <sup>1</sup> H spectrum for <b>12</b> (□-Me-(4-Me-C <sub>6</sub> H <sub>4</sub> )-Ala)                                                                                                  | 63   |
|         | <sup>1</sup> H, <sup>13</sup> C spectra for <b>1c</b>                                                                                                                                   | 64   |

### A. Experimental Procedures

#### General

THF was distilled from Na/benzophenone immediately before use. (*S*)-Boc-Ala and (*S*)-Boc-Phe were purchased from Advanced ChemTech and were used as received. Compounds **1a** and **1b** were prepared according to the literature method.<sup>1</sup> Compounds (3*S*)-**2a** and (3*S*)-**3a** were prepared in 91 and 67% yield from (*S*)-Boc-Ala and (*S*)-Boc-Phe using a modification of Shea’s protocol;<sup>2</sup> enantiomeric excess of these compounds was assessed by HPLC (Chiralcel AD and OD). Isopropyl triflate was prepared according to the literature<sup>3</sup> immediately before use and was dispensed as a solution in CCl<sub>4</sub>. <sup>1</sup>H NMR Spectra were recorded at 500 and 400 MHz; the

corresponding  $^{13}\text{C}$  NMR resonant frequencies were 125 and 100 MHz respectively. High resolution mass spectra were recorded under FAB conditions (NBA. PEG); in each case the expected molecular formula ( $\text{M}+1$ ,  $^{35}\text{Cl}$ ) gave the closest match among all possible formulas.

### General procedure for *N*-alkylation of *N*-*H*-1,4-benzodiazepine-2-ones

At 0 °C to a stirred solution of (3*S*)-**2a** (5.1 mmol, 1.0 equiv.) in dry THF (30.0 mL) was added NaH (5.7 mmol, 1.12 equiv., 60% suspension in mineral oil) in one portion. The resulting solution was stirred at 0 °C for 30 min before the dropwise addition of alkyl triflate (15 mmol, 3.0 equiv.). The reaction mixture was stirred for a further 10 min at 0 °C, at which point TLC (1:5 EtOAc:hexanes) indicated the reaction was complete. The reaction was quenched at 0 °C with 20 ml of saturated aqueous  $\text{NH}_4\text{Cl}$  solution, and extracted with  $\text{CH}_2\text{Cl}_2$  (3 x 30 mL). The combined extracts were dried over anhydrous  $\text{Na}_2\text{SO}_4$ , filtered, and concentrated. The crude product was purified by flash column chromatography on silica gel.

### *N*-*i*-Pr benzodiazepine **1c**

The procedure above was followed with **1a** (102 mg, 0.376 mmol) in anhydrous THF (2 mL), HMPA (390  $\mu\text{L}$ , 2.26 mmol), NaH (0.451 mmol), *i*-PrOTf (241.7 mg, 1.13 mmol). After stirring overnight, aqueous workup and chromatography (20% EtOAc/Hexane) afforded 65.2 mg (55%) of **1c** as a yellow oil.

$^1\text{H}$  NMR ( $\text{CDCl}_3$ )  $\delta$  1.21 (d,  $J$  = 7.1 Hz, 3H), 1.50 (d,  $J$  = 6.7 Hz, 3H), 3.73 (d,  $J$  = 10.5 Hz, 1H), 4.55 (m,  $J$  = 6.9 Hz, 1H), 4.75 (d,  $J$  = 10.5 Hz, 1H), 7.27 (s, 1H), 7.37-7.50 (m, 5H), 7.61 (m, 1H);

$^{13}\text{C}$  NMR ( $\text{CDCl}_3$ )  $\delta$  20.62, 22.39, 51.08, 58.05, 125.23, 128.59, 129.31, 129.55, 130.42, 130.72, 130.76, 132.44, 138.16, 140.72, 168.68, 169.52;

HRMS (FAB) calcd for  $\text{C}_{18}\text{H}_{18}\text{N}_2\text{OCl}$  [ $\text{M} + \text{H}$ ] $^+$  313.1108, found 313.1123 (+4.8 ppm, +1.5 mmu)

### *N*-Me benzodiazepine (3*S*)-**2b**

The procedure above was followed with (3*S*)-**2a** (0.12g, 0.42 mmol) in anhydrous THF (2.0 mL), 60% NaH (19 mg, 0.47 mmol) and methyl triflate (58  $\mu\text{L}$ , 0.51mmol). Purification with flash column chromatography on silica gel (1:2 Hexanes/EtOAc) provided 118 mg (94%) of (3*S*)-**2b**, which was identical by  $^1\text{H}$  NMR to the literature material.<sup>4</sup> Chiral stationary phase HPLC (Chiralcel AD) indicated 100 %ee.

### *N*-*i*-Pr benzodiazepine (3*S*)-**2c**

The procedure above was followed with (3*S*)-**2a** (1.44 g, 5.08 mmol) in anhydrous THF (30.0 ml), 60% NaH (228.0 mg, 5.69 mmol) and isopropyl triflate (2.92 g, 15.2 mmol, solution in 2 mL  $\text{CCl}_4$ ). Purification with flash column chromatography on silica gel (1:5 Hexanes/EtOAc) provided 1.36 g (82%) of (3*S*)-**2c** as a white solid, mp 113.8 –114.9 °C.

$^1\text{H}$  NMR ( $\text{CDCl}_3$ ):  $\delta$  7.61-7.58 (m, 2H), 7.48-7.35 (m, 5H), 7.25 (s, 1H), 4.55 (septet,  $J$  = 6.9 Hz, 1H), 3.67 (q,  $J$  = 6.4 Hz, 1H), 1.69 (d,  $J$  = 6.4 Hz, 3H), 1.48 (d,  $J$  = 6.9 Hz, 3H), 1.20 (d,  $J$  = 7.1 Hz, 3H).

$^{13}\text{C}$  NMR ( $\text{CDCl}_3$ ):  $\delta$  170.8, 166.6, 140.4, 138.1, 133.0, 130.64, 130.58, 130.3, 129.4, 129.3, 128.6, 125.3, 59.7, 51.4, 22.3, 20.7, 17.3.

HRMS calcd. for  $\text{C}_{19}\text{H}_{20}\text{ClN}_2\text{O}$  ( $\text{M}+1$ ) 327.1264, found 327.1264.

$[\alpha]_D^{21} = +222.7^\circ$  ( $c$  = 0.55,  $\text{CHCl}_3$ ). Chiral stationary phase HPLC (Chiralcel AD) indicated 100 %ee.

***N*-*i*-Pr Benzodiazepine (3*S*)-3c**

The procedure above was followed with (3*S*)-3a (0.683 g, 1.89 mmol) in anhydrous THF (14 mL), 60% NaH (84.7 mg, 2.12 mmol) and isopropyl triflate (1.0921g, 5.68 mmol (neat)). Purification with flash column chromatography on silica gel (1:4 EtOAc:hexanes) provided 0.439 g (58%) of (3*S*)-3c as a pale yellow solid, mp 67-69 °C.

<sup>1</sup>H NMR (CDCl<sub>3</sub>):  $\delta$  7.56-7.15 (several multiplets, 13H), 4.58 (septet, *J* = 6.9 Hz, 1H), 3.70 (dd, *J* = 8.2, 5.4 Hz, 1H), 3.586 (dd, *J* = 13.9, 8.2 Hz, 1H), 3.525 (dd, *J* = 13.9, 5.4 Hz, 1H), 1.56 (s, 3H), 1.47 (d, *J* = 6.7 Hz, 3H), 1.19 (d, *J* = 7.1 Hz, 3H).

<sup>13</sup>C NMR (CDCl<sub>3</sub>): 169.8, 166.8, 140.2, 139.5, 138.1, 132.7, 130.66, 130.62, 130.4, 129.9, 129.39, 129.33, 128.5, 128.2, 126.1, 125.4, 66.0, 51.5, 37.8, 22.3, 20.6.

HRMS: calcd for C<sub>25</sub>H<sub>23</sub>N<sub>2</sub>OCl (*M*+1) 403.1577, found 403.1583 (+1.4 ppm, +0.6 mmu).

$[\alpha]_D^{21} = +64.4^\circ$  (*c* = 0.5, CHCl<sub>3</sub>). Chiral stationary phase HPLC (Chiralcel AD) indicated 100 %ee.

**General Protocol for the C3-alkylation of 3-alkyl-1,4-benzodiazepine-2-ones.**

At -78 °C under nitrogen, to a stirred solution of (3*S*)-2c (0.15mmol, 1.0 equiv) and HMPA (0.90 mmol, 6.0 equiv) in anhydrous THF (3.0 mL) was added LDA (0.15 mmol, 1.2 equiv, 1.5 M in hexanes). After 15 minutes, *n*-BuLi (0.15 mmol, 1.2 equiv, 2.5 M in hexanes) was added and the mixture stirred for a further 15 min. The electrophile (1.5 mmol, 10 equiv.) was then added dropwise via syringe at -78 °C and the reaction was stirred at -78 °C until the starting benzodiazepine was consumed (TLC). The reaction was quenched at -78 °C by the addition of saturated aqueous NH<sub>4</sub>Cl (5.0 mL) and extracted with CH<sub>2</sub>Cl<sub>2</sub> (3 x 10 mL). The combined extracts were dried over anhydrous Na<sub>2</sub>SO<sub>4</sub>, filtered, and concentrated. The crude product was purified by flash column chromatography on silica gel.

***N*-Me Benzodiazepine benzylation product (±)-4**

The procedure above was followed with (3*S*)-2b (44.0 mg, 0.15mmol), HMPA (155  $\mu$ L, 0.90 mmol), LDA (118  $\mu$ L, 0.18 mmol, 1.5M in hexanes), *n*-BuLi (71.0  $\mu$ L, 0.18 mmol, 2.5M in hexanes) and benzyl bromide (176.8  $\mu$ L, 1.5 mmol). The reaction mixture was stirred at -78 °C for 3 h. Purification with flash column chromatography on silica gel (1:5 Hexanes/EtOAc) provided 37.5 mg (72%) of (±)-4 as a colorless oil.

<sup>1</sup>H NMR (CDCl<sub>3</sub>) indicated a 56:44 mixture of the axial-Me and equatorial-Me conformers:  $\delta$  7.6-7.1 (m, 12H), 6.85 (br d, *J* = 6.0 Hz, 1H), 3.71 (d, *J* = 13.5, 1H  $\square$  0.56 ax-Me), 3.48 (s, 3H  $\square$  0.44 eq-Me), 3.46 (s, 3H  $\square$  0.56 ax-Me, overlapping with signal at 3.48), 3.28 (d, *J* = 13.3, 1H  $\square$  0.56 ax-Me) 2.58 (d, *J* = 13.5 Hz, 1H x 0.44 eq-Me), 2.52 (d, *J* = 13.5 Hz, 1H x 0.44 eq-Me), 1.75 (s, 3H  $\square$  0.44 eq-Me), 0.79 (s, 3H  $\square$  0.56 ax-Me)

<sup>13</sup>C NMR (CDCl<sub>3</sub>) was consistent with an approximate 1:1 mixture of axial-Me and equatorial-Me conformers (35 resonances found for a possible 2 x 20 unique carbons): 173.9, 172.9, 165.5, 164.9, 142.4, 139.9, 138.4, 136.6, 132.3, 131.8 (2 partially resolved peaks), 131.7, 131.5, 130.4, 129.9, 129.8, 129.5, 128.9, 128.7, 128.5, 128.33, 128.26, 127.5, 126.7, 126.3, 122.4, 122.2, 67.9, 65.8, 47.7, 37.7 (2 partially resolved peaks), 37.5, 28.3, 17.6 ;

HRMS calcd. for C<sub>24</sub>H<sub>22</sub>ClN<sub>2</sub>O (*M*+1) 389.1421, found 389.1419.

Chiral stationary phase HPLC (Chiralcel AD-H) indicated 0 %ee.

**(3*R*)-5 from Ala-derived benzodiazepine (3*S*)-2c**

The general procedure was followed with (3*S*)-2c (16.6 mg, 0.05mmol), HMPA (53.4  $\mu$ L, 0.30 mmol), LDA (41  $\mu$ L, 0.06 mmol, 1.5M in hexanes), *n*-BuLi (25  $\mu$ L, 0.06 mmol, 2.5M in hexanes) and benzyl bromide (61  $\mu$ L, 0.50 mmol). The reaction mixture was stirred at -78 °C for 3 h.

Purification with flash column chromatography on silica gel (1:6 Hexanes/EtOAc) provided 23.7 mg (74%) of (3*R*)-**5** as a colorless oil.

<sup>1</sup>H NMR (CDCl<sub>3</sub>) indicated a 55:45 mixture of the axial-Me and equatorial-Me conformers:

□ 7.60-7.15 (m, 12H), 6.94-6.86 (m, 1H), 4.62-4.52 (two overlapping septets, 1H), 3.74 (d, *J* = 13.5 Hz, 1H □ 0.55 ax-Me), 3.22 (d, *J* = 13.5 Hz, 1H □ 0.55 ax-Me), 2.54 (d, *J* = 13.9 Hz, 1H □ 0.45 eq-Me), 2.39 (d, *J* = 13.8 Hz, 1H □ 0.45 eq-Me), 1.71 (s, 3H □ 0.45 eq-Me), 1.54 (two overlapping doublets, *J* = 6.9 Hz, 6H □ 0.45 eq-Me), 1.33 (d, *J* = 7.1 Hz, 3H □ 0.55 ax-Me), 1.29 (d, *J* = 7.1 Hz, 0.55 ax-Me), 0.72 (s, 3H □ 0.55 ax-Me).

<sup>1</sup>H-<sup>1</sup>H COSY (CDCl<sub>3</sub>): Among other correlations, spin-coupling between the following benzylic protons is evident: □ 3.74 and 3.22; □ 2.54 and 2.39.

<sup>1</sup>H-<sup>1</sup>H EXSY (CDCl<sub>3</sub>): EXSY confirms that the two species present in solution interconvert, consistent with our assignment as (*M*)- and (*P*)-conformers. Chemical exchange between the following equatorial and axial diastereotopic benzylic protons is evident: □ 3.74 and 2.39; □ 3.22 and 2.54. Chemical exchange between the accidentally equivalent isopropyl methyls (2) at □ 1.54 with the diastereotopic methyls at □ 1.33 and 1.29 is seen. Finally, chemical exchange between the equatorial Me at □ 1.71 and the axial Me at 0.72 is also evident. See end of experimental section of the Supporting Information for determination of exchange rate.

<sup>13</sup>C NMR (CDCl<sub>3</sub>) was consistent with an approximate 1:1 mixture of axial-Me and equatorial-Me conformers (44 resonances found for a possible 2 x 22 unique carbons): □ 173.4, 172.1, 165.3, 164.9, 140.64, 140.58, 139.77, 139.7, 138.6, 137.0, 134.2, 133.9, 132.3, 131.1, 130.8, 130.43, 130.40, 129.9, 129.77, 129.71, 129.47, 129.45, 129.39, 129.2, 128.5, 128.4, 128.2, 127.5, 126.7, 126.2, 124.7, 124.6, 68.5, 66.3, 53.6, 53.3, 47.6, 37.7, 28.5, 22.3, 22.0, 20.8, 20.6, 17.6.

HRMS calcd. for C<sub>26</sub>H<sub>26</sub>ClN<sub>2</sub>O (M+1) 417.1734, found 417.1743 (+2.2 ppm, +0.9 mmu).

[□]<sup>24</sup><sub>D</sub> = +31.4° (c = 0.15, CHCl<sub>3</sub>). Chiral stationary phase HPLC (Chiralcel AD-H) indicated 97 %ee. Conversion to the corresponding quaternary amino acid confirmed (*R*)-stereochemistry (see below).

### (3*S*)-**5** from Phe-derived benzodiazepine (3*S*)-**3c**

The general procedure was followed with (3*S*)-**3c** (50 mg, 0.124 mmol), HMPA (130 μL, 0.745 mmol), LDA (99 μL, 0.149 mmol, 1.5M in hexanes), *n*-BuLi (60 μL, 0.149 mmol, 2.5M in hexanes) and methyl iodide (77 μL, 1.24 mmol). The reaction mixture was stirred at -78 °C for 2.5 hours. Purification with flash column chromatography on silica gel (1:6 EtOAc:hexanes) provided 32.9 mg (64%) of (3*S*)-**5** as a pale yellow oil.

Chiral stationary phase HPLC (Chiralcel AD-H) indicated 96 %ee and (3*S*)-stereochemistry (comparison with (3*R*)-**5** synthesized from (3*S*)-**2c** above).

### (3*R*)-**6**

The general procedure was followed with (3*S*)-**2c** (50.0 mg, 0.15mmol), HMPA (160 □L, 0.90 mmol), LDA (123 □L, 0.18 mmol, 1.5M in hexanes), *n*-BuLi (74 □L, 0.18 mmol) and 4-methylbenzyl bromide (284.5 mg, 1.5 mmol). The reaction mixture was stirred at -78 °C for 6 h. Purification with flash column chromatography on silica gel (1:8 Hexanes/EtOAc) provided 45.0 mg (68%) of (3*R*)-**6** as a colorless oil,

<sup>1</sup>H NMR (CDCl<sub>3</sub>) indicated a 53:47 ratio of axial-Me and equatorial-Me conformers: □ 7.58 (t, *J* = 7.1 Hz, 2H), 7.50- 7.06 (unassigned aromatic protons, 8H), 7.01 (d, *J* = 8.0 Hz, 1H), 6.79 (d, *J* = 8.0 Hz, 1H), 4.60-4.53 (two overlapping septets, 1H), 3.70 (d, *J* = 13.6 Hz, 1H □ 0.53 ax-Me), 3.17 (d, *J* = 13.5 Hz, 1H □ 0.53 ax-Me), 2.49 (d, *J* = 13.7 Hz, 1H □ 0.47 eq-Me), 2.35 (s, 3H □ 0.53 ax-Me),

2.33 (d,  $J = 13.7$  Hz, 1H  $\square$  0.47 eq-Me), 2.28 (s, 3H  $\square$  0.47 eq-Me), 1.70 (s, 3H  $\square$  0.47 eq-Me), 1.56-1.52 (m, 6H x 0.53 ax-Me), 1.327 (d,  $J = 6.8$  Hz, 3H x 0.47 eq-Me), 1.289 (d,  $J = 6.8$  Hz, 3H x 0.47 eq-Me), 0.71 (s, 3H  $\square$  0.52 ax-Me).

$^{13}\text{C}$  NMR ( $\text{CDCl}_3$ ) was consistent with an approximate 1:1 mixture of conformers (44 resonances found for a possible 2 x 23 unique carbons):  $\square$  173.4, 172.3, 165.2, 164.8, 140.7, 140.6, 139.8, 139.7, 136.2, 135.7, 135.4, 134.3, 133.9, 133.8, 132.1, 131.0, 130.8, 130.4, 129.9, 129.7, 129.6, 129.5, 129.4, 129.2, 128.9, 128.5, 128.4, 128.3, 124.7, 124.6, 68.6, 66.3, 53.6, 53.2, 47.1, 37.3, 28.4, 22.3, 22.0, 21.2, 21.1, 20.7, 20.6, 17.6.

HRMS calcd. for  $\text{C}_{27}\text{H}_{28}\text{ClN}_2\text{O}$  ( $M+1$ ) 431.1890, found 431.1892 (+0.4 ppm, +0.2 mmu).

$[\alpha]_{\text{D}}^{21} = +31.2^\circ$  ( $c = 0.16$ ,  $\text{CHCl}_3$ ). Chiral stationary phase HPLC (Chiralcel AD-H) indicated 95 %ee. Stereochemistry assigned as (*R*)- based on the sign of rotation of the corresponding quaternary amino acid (see below).

### (3*R*)-7

The general procedure was followed with (3*S*)-**2c** (50.0 mg, 0.15mmol), HMPA (160  $\square$ L, 0.90 mmol), LDA (123  $\square$ L, 0.18 mmol), *n*-BuLi (74  $\square$ L, 0.18 mmol) and 2-phenylbenzyl bromide (284.5 mg, 1.5 mmol). The reaction mixture was stirred at  $-78^\circ\text{C}$  for 10 h. Purification with flash column chromatography on silica gel (1:8 Hexanes/EtOAc) provided 53.0 mg (70%) of (3*R*)-7 as a colorless oil.

$^1\text{H}$  NMR ( $\text{CDCl}_3$ ) indicated a 50:50 mixture of axial-Me and equatorial-Me conformers:  $\square$  8.11 (dd,  $J = 7.8, 1.2$  Hz, 1H x 0.5), 7.58-6.99 (unassigned protons, 16.5 H), 4.56 (septet,  $J = 7.1$  Hz, 1H  $\square$  0.50), 4.49 (septet,  $J = 6.9$  Hz, 1H  $\square$  0.50), 3.68 (d,  $J = 13.5$  Hz, 1H x 0.5 ax-Me), 3.63 (d,  $J = 13.5$  Hz, 1H x 0.5 ax-Me) 2.51 (apparent s, actually collapsed AB pattern of benzylic protons of eq-Me conformer, 2H x 0.5), 1.54 (d,  $J = 6.9$  Hz, 3H  $\square$  0.5), 1.46 (d,  $J = 6.7$  Hz, 3H  $\square$  0.5), 1.40 (s, 3H  $\square$  0.5 eq-Me), 1.29 (d,  $J = 7.1$  Hz, 3H  $\square$  0.5), 1.21 (d,  $J = 7.1$  Hz, 3H  $\square$  0.5), 0.33 (s, 3H  $\square$  0.50 ax-Me).

$^{13}\text{C}$  NMR ( $\text{CDCl}_3$ ) was consistent with a 1:1 mixture of conformers (55 resonances found for a possible 2 x 28 unique carbons):  $\square$  172.8, 172.1, 165.0, 164.5, 144.1, 143.2, 142.8, 141.7, 140.6, 140.5, 139.9, 139.5, 135.9, 134.7, 134.0, 133.9, 133.6, 131.0, 130.7, 130.6, 130.4, 130.3, 130.1, 129.9, 129.8, 129.7, 129.5, 129.4, 129.3, 129.2, 129.1, 128.4, 128.21, 128.19, 128.16, 127.2, 126.9, 126.5, 126.37, 126.30, 126.2, 124.7, 124.6, 69.0, 67.3, 53.5, 53.2, 42.4, 33.6, 28.0, 22.2, 22.0, 20.8, 20.5, 17.2.

HRMS calcd. for  $\text{C}_{32}\text{H}_{30}\text{ClN}_2\text{O}$  ( $M+1$ ) 493.2047, found 493.2051 (+0.9 ppm, +0.4 mmu).

$[\alpha]_{\text{D}}^{24} = +163.7^\circ$  ( $c = 0.14$ ,  $\text{CHCl}_3$ ). Chiral stationary phase HPLC (AD-H) indicated 99% ee. The stereochemistry is assumed to be (*R*) based on other retentive alkylations.

### (3*R*)-8

The general procedure was followed with (3*S*)-**2c** (145.8 mg, 0.45mmol), HMPA (481  $\square$ L, 2.69 mmol), LDA (370  $\square$ L, 0.54 mmol, 1.5M in hexanes), *n*-BuLi (221  $\square$ L, 0.54 mmol, 2.5M in hexanes) and allyl bromide (350  $\square$ L, 4.5 mmol). The reaction mixture was stirred at  $-78^\circ\text{C}$  for 4 h. Purification with flash column chromatography on silica gel (1:10 Hexanes/EtOAc) provided 124.7 mg (76%) of (3*R*)-8 as a colorless oil,

$^1\text{H}$  NMR ( $\text{CDCl}_3$ ) indicated a 50:50 mixture of axial-Me and equatorial-Me conformers:  $\square$  7.62-7.55 (m, 2H), 7.48-7.37 (m, 4H), 7.31 (dd,  $J = 8.7, 5.5$  Hz, 1H), 7.19 (dd,  $J = 7.6$  Hz, 2.6 Hz, 1H), 6.29-6.20 (m, 1H  $\square$  0.5), 5.61-5.52 (m, 1H  $\square$  0.5), 5.22 (apparent d,  $J = 16.3$  Hz, 1H  $\square$  0.5), 5.17 (apparent d,  $J = 10.3$  Hz, 1H x 0.5), 4.94 (apparent d,  $J = 10.3$  Hz, 1H  $\square$  0.5), 4.63 (apparent d,  $J =$

16.3 Hz, 1H  $\square$  0.5), 4.56-4.45 (two overlapping septets, 1H), 3.101 (dd,  $J$  = 13.9, 5.7 Hz, 1H  $\square$  0.5 ax-Me), 2.737 (dd,  $J$  = 13.9, 8.3 Hz, 1H  $\square$  0.5 ax-Me), 1.93-1.83 (m, 2H x 0.5), 1.83 (s, 3H  $\square$  0.5 eq-Me), 1.510 (d,  $J$  = 3.5 Hz, 3H x 0.5), 1.497 (d,  $J$  = 3.5 Hz, 3H x 0.5), 1.287 (d,  $J$  = 7.1 Hz, 3H x 0.5), 1.267 (d,  $J$  = 7.1 Hz, 3H x 0.5), 0.78 (s, 3H  $\square$  0.5 ax-Me).

$^{13}\text{C}$  NMR ( $\text{CDCl}_3$ ) was consistent with a 50:50 mixture of conformers (40 resonances found from 2 x 20 unique carbons):  $\square$  173.1, 172.3, 165.2, 165.0, 140.6, 140.3, 139.6, 139.5, 135.8, 134.1, 133.9, 134.1, 133.9, 132.9, 130.9, 130.8, 130.5, 130.4, 129.8, 129.7, 129.4, 129.34, 129.30, 128.5, 124.8, 124.7, 118.3, 118.0, 67.5, 65.8, 53.4, 53.1, 47.3, 37.2, 28.6, 22.2, 22.1, 20.7, 20.6, 18.0.

HRMS calcd. for  $\text{C}_{22}\text{H}_{24}\text{ClN}_2\text{O}$  ( $M+1$ ) 367.1577, found 367.1577.

$[\alpha]_{\text{D}}^{24} = +50.0$  ( $c = 0.33$ ,  $\text{CHCl}_3$ ). Chiral stationary phase HPLC (Chiralcel OD) indicated 94 %ee. The stereochemistry is assumed to be (*R*) based on other retentive alkylations.

### (3*S*)-10 from (3*S*)-3c

The general procedure was followed with (3*S*)-3c (20 mg, 0.0496 mmol), HMPA (52  $\mu\text{L}$ , 0.298 mmol), LDA (40  $\mu\text{L}$ , 0.0595 mmol, 1.5M in hexanes), *n*-BuLi (24  $\mu\text{L}$ , 0.0595 mmol, 2.5M in hexanes) and allyl bromide (43  $\mu\text{L}$ , 0.496 mmol). The reaction mixture was stirred at  $-78^\circ\text{C}$  for 20 minutes. Purification with flash column chromatography on silica gel (1 EtOAc: 8 Hex) provided 12.1 mg (57%) of (3*S*)-5 as a pale yellow oil.

$^1\text{H}$  NMR ( $\text{CDCl}_3$ ) indicated a 60:40 mixture of conformers:  $\square$  7.6-6.96 (several multiplets, 13H), 6.41-6.32 (m, 1H x 0.4), 5.71-5.62 (m, 1H x 0.6), 5.27 (apparent d,  $J$  = 10.0 Hz, 1H x 0.4), 5.23 (apparent d,  $J$  = 16.3 Hz, 1H x 0.4), 5.01 (dd,  $J$  = 10.0, 1.6 Hz, 1H x 0.6), 4.65 (dd,  $J$  = 16.8, 1.6 Hz, 1H x 0.6), 4.56 (two overlapped septets,  $J$  = 6.9 Hz, 1H), 3.67 (d,  $J$  = 14.6 Hz, 1H x 0.6), 3.39 (d,  $J$  = 14.6 Hz, 1H x 0.6), 3.03 (complex d,  $J$  = 14.7 Hz, 1H x 0.4), 2.69 (dd,  $J$  = 14.7, 8.7 Hz, 1H x 0.4), 2.46 (d,  $J$  = 14.3 Hz, 1H x 0.4), 2.42 (d,  $J$  = 14.3 Hz, 1H x 0.4), 1.88 (dd,  $J$  = 15.0, 6.8 Hz, 1H x 0.6), 1.59-1.54 (m, 1H x 0.6), 1.52 (two overlapped doublets,  $J$  = 6.9 Hz, 6H x 0.4), 1.30 (d,  $J$  = 7.0 Hz, 3H x 0.6), 1.285 (d,  $J$  = 7.0 Hz, 3H x 0.6).

$^{13}\text{C}$  NMR ( $\text{CDCl}_3$ ) was consistent with a near 1:1 mixture of conformers (48 resonances found for 2 x 24 unique carbons):  $\square$  171.9, 171.6, 165.0, 164.7, 140.4, 140.0, 139.8, 139.6, 138.5, 136.6, 135.9, 134.1, 133.6, 132.9, 132.3, 130.9, 130.50, 130.48, 130.4, 129.8, 129.7, 129.6, 129.5, 129.4, 129.3, 129.2, 128.43, 128.36, 128.2, 127.5, 126.6, 126.3, 124.74, 124.70, 118.4, 118.2, 70.4, 70.0, 53.4, 53.3, 43.2, 42.6, 34.5, 32.5, 22.1, 21.9, 20.5, 20.4.

HRMS: calcd for  $\text{C}_{28}\text{H}_{27}\text{N}_2\text{OCl}$  443.1890, found 443.1898 (+1.7 ppm, +0.8 mmu).

$[\alpha]_{\text{D}}^{21} = +72.1^\circ$  ( $c = 0.315$ ,  $\text{CHCl}_3$ ). Chiral stationary phase HPLC (Chiralcel AD-H) indicated 86 %ee. The stereochemistry is assumed to be (*S*) on the basis of other retentive alkylations.

### (3*S*)-9: deuteration of enolate derived from (3*S*)-2c

A solution of (3*S*)-2c (16.6 mg, 0.05 mmol) and HMPA (53  $\mu\text{L}$ , 0.3 mmol) in anhydrous THF (1.0 mL) was cooled to  $-78^\circ\text{C}$  under nitrogen in a dry ice-acetone bath and LDA (41.0  $\mu\text{L}$ , 0.06 mmol, 1.5M in hexanes) was added dropwise via syringe at  $-78^\circ\text{C}$ . After the mixture was stirred for 30 min, *n*-BuLi (25  $\mu\text{L}$ , 0.06 mmol, 2.5M in hexanes) was added and then the reaction mixture was stirred for 20 min. The enolate was quenched at  $-78^\circ\text{C}$  with a mixture of deuteriotrifluoroacetic acid and deuterium oxide (4  $\mu\text{L}$  of D-OTFA in 200.0  $\mu\text{L}$  of  $\text{D}_2\text{O}$ ). Workup and purification with flash column chromatography on silica gel (1:5 Hexanes/EtOAc) provided 14.2 mg (85%) of (3*S*)-9 as a pale yellow oil (96%D by  $^1\text{H}$  NMR).

$^1\text{H}$  NMR ( $\text{CDCl}_3$ )  $\square$  7.62-7.58 (m, 2H), 7.50-7.33 (m, 5H), 7.28-7.25 (m, 1H), 4.56 (septet,  $J$  = 6.8 Hz), 1.69 (s, 3H), 1.48 (d,  $J$  = 6.9 Hz, 3H), 1.20 (d,  $J$  = 7.1 Hz).

$^{13}\text{C}$  NMR ( $\text{CDCl}_3$ )  $\delta$  170.8, 166.7, 140.4, 138.1, 133.0, 130.64, 130.59, 130.3, 129.4, 129.3, 128.6, 125.3, 59.7 (t,  $^1J_{\text{CD}} = 19.6$  Hz), 20.7, 17.1.

FABMS  $m/z$  328.1 ( $\text{M}+1$ ),

$[\alpha]_{\text{D}}^{24} = +219.2^\circ$  ( $c = 0.37$ ,  $\text{CHCl}_3$ ). Chiral stationary phase HPLC (Chiralcel AD) indicated 99% ee and (3*S*)-stereochemistry

### General procedure for hydrolysis of *N*-*i*-Pr-1,4-benzodiazepine-2-ones to the corresponding quaternary amino acids.

The benzodiazepine to be hydrolyzed (0.1 mmol) was combined with hydrochloric acid (9.0M, 2.0mL) in a pressure tube (Teflon screw cap) and heated at 140 °C (bath temperature) for 3 days. Water (2.0 mL) was added and then the mixture was extracted with EtOAc (3 x 3mL). The water layer was separated, concentrated in vacuo and the residue was dissolved in EtOH (2.0 mL). Propylene oxide (0.3 mL) was added, and the resulting solution was heated at reflux for 30 minutes. Upon cooling the precipitated solid was collected and washed with ethyl acetate and acetone, affording the corresponding free amino acid.

### (*R*)- $\alpha$ -methylphenylalanine **11**

41.6 mg (0.1 mmol) of (3*R*)-**5** was treated as above to afford 9.0 mg of (*R*)- $\alpha$ -methylphenylalanine **11** (50%).

$^1\text{H}$  NMR ( $d_6$ -DMSO)  $\delta$  7.60-7.15 (br m, 7H), 2.79 (d,  $J = 13.7$  Hz, 1H), 2.51 (d,  $J = 13.7$  Hz, 1H), 1.23 (s, 3H). This spectrum was identical in every aspect to commercial  $\alpha$ -methylphenylalanine.

$[\alpha]_{\text{D}}^{26} = +25.6$  ( $c = 1.25$ ,  $\text{H}_2\text{O}$ ). Acros (*S*)- $\alpha$ -methylphenylalanine (item# 27543-2500) is levorotatory:  $[\alpha]_{\text{D}}^{25} = -24.8^\circ$ , ( $c = 1.25$ ,  $\text{H}_2\text{O}$ ). We thus assign (*R*)-stereochemistry to our synthesized amino acid.

### (*R*)- $\alpha$ -methyl-(4-methylphenyl)alanine **12**

33.1 mg (0.77 mmol) of (3*R*)-**6** was treated as above to afford 9.2 mg of  $\alpha$ -methyl-(4-methylphenyl)alanine **12** (62%).

$^1\text{H}$  NMR ( $d_6$ -DMSO)  $\delta$  7.50-6.80 (br m, 6H), 2.96 (d,  $J = 13.5$  Hz, 1H), 2.73 (d,  $J = 13.5$  Hz, 1H), 2.26 (s, 3H), 1.22 (s, 3H).

HRMS: calcd for  $\text{C}_{11}\text{H}_{15}\text{NO}_2$  194.1181, found 194.1185 (+2.0 ppm, +0.4 mmu).

$[\alpha]_{\text{D}}^{19} = +16.6^\circ$  ( $c = 0.10$ ,  $\text{H}_2\text{O}$ ).

The optical rotations of the enantiomers of this compound are not known in the literature—we assigned the (*R*)-configuration based on the positive sign of the optical rotation, and the structural similarity with  $\alpha$ -methylphenylalanine **11**.

### Dynamic NMR Studies of **1b**, **1c**, and **5**

NMR probe temperatures were determined by calibration with ethylene glycol. The barriers to inversion of **1b** and **1c** were determined by achieving coalescence in  $d_6$ -DMSO on a 400 MHz spectrometer. **1b**:  $T_c$ (methylene protons) = 117 °C,  $\Delta\nu = 316.4$  Hz,  $J = 10.8$  Hz,  $\Delta G^\ddagger = 18.0$  kcal/mol (lit.<sup>5</sup> 17.6 kcal/mol in  $d_5$ -pyridine). **1c**:  $T_c$ (*i*-Pr methyl protons) = 159 °C,  $\Delta\nu = 89.4$  Hz,  $\Delta G^\ddagger = 21.1$  kcal/mol. The barrier to inversion in **5** in  $\text{CDCl}_3$  at 24 °C was determined by EXSY<sup>6</sup> (400 MHz), using a mixing time of 1 sec and a relaxation delay of 2 sec. Since the M and P conformers exist in a nearly 1:1 ratio, we made the simplifying assumption that the M→P and P→M exchange rates are equal.

## B. Tabulation of HPLC Conditions and Retention Times

Reported retention times are determined from racemic and enantiomerically enriched/pure samples. The HPLC columns are not thermostatted and as a consequence retention times are subject to day to day variability (cf. cpds **2c**, **9**; **9** is the deuterated analogue of **2c**).

| compound  | column | solvent, flow rate                 | fast enantiomer<br>(config)<br>retention time                 | slow enantiomer<br>(config)<br>retention time                 |
|-----------|--------|------------------------------------|---------------------------------------------------------------|---------------------------------------------------------------|
| <b>2a</b> | AD     | 10% isopropanol-hexane<br>1 mL/min | 11.0 min ( <i>3R</i> )                                        | 13.9 min ( <i>3S</i> )                                        |
| <b>3a</b> | OD     | 3% isopropanol-hexane<br>1 mL/min  | 27.4 min ( <i>3R</i> )                                        | 30.9 min ( <i>3S</i> )                                        |
| <b>2b</b> | AD     | 5% isopropanol-hexane<br>1 mL/min  | 14.7 min ( <i>3R</i> )                                        | 16.5 min ( <i>3S</i> )                                        |
| <b>2c</b> | AD     | 1% isopropanol-hexane<br>1 mL/min  | 16.4 min ( <i>3R</i> )                                        | 18.2 min ( <i>3S</i> )                                        |
| <b>3c</b> | AD     | 5% isopropanol-hexane<br>1 mL/min  | 14.7 min ( <i>3R</i> )                                        | 16.2 min ( <i>3S</i> )                                        |
| <b>4</b>  | AD-H   | 2% isopropanol-hexane<br>1 mL/min  | 19.4 min                                                      | 24.4                                                          |
| <b>5</b>  | AD-H   | 1% isopropanol-hexane<br>1 mL/min  | 20.2 min ( <i>3S</i> )                                        | 22.6 min ( <i>3R</i> )                                        |
| <b>6</b>  | AD-H   | 1% isopropanol-hexane<br>1 mL/min  | 12.8 min ( <i>3R</i> )                                        | 18.2 min ( <i>3S</i> )                                        |
| <b>7</b>  | AD-H   | 1% isopropanol-hexane<br>1 mL/min  | 13.6 min<br>major enantiomer<br>from ( <i>3S</i> )- <b>2c</b> | 16.4 min                                                      |
| <b>8</b>  | OD     | 100% hexane<br>1 mL/min            | 17.9 min                                                      | 19.1 min<br>major enantiomer<br>from ( <i>3S</i> )- <b>2c</b> |
| <b>9</b>  | AD     | 1% isopropanol-hexane<br>1 mL/min  | 15.8 min ( <i>3R</i> )                                        | 16.9 min ( <i>3S</i> )                                        |
| <b>10</b> | AD-H   | 1% isopropanol-hexane<br>1 mL/min  | 13.3 min                                                      | 14.3 min<br>major enantiomer<br>from ( <i>3S</i> )- <b>3c</b> |



### C. Computational Details, Absolute Energies, and Cartesian Coordinates for Calculated Structures

B3LYP/6-31G\* equilibrium geometries and ring inversion transition structures of the enolates, and single point electronic energies ( $E_0$ ) at the B3LYP/6-31+G\*\*/B3LYP/6-31G\* level were obtained using Gaussian 98 (v.A.11). Vibrational frequency analysis was used to identify stationary points as minima (no imaginary frequencies) or transition states (1 imaginary frequency). Displacement vectors associated with the sole imaginary frequencies confirmed that the located transition structures were associated with the ring inversion process. The standard Gaussian 98 statistical mechanics calculations were used to determine the enthalpic corrections ( $H_{\text{corr}}$ ) and total entropy ( $S_{\text{tot}}$ ) from the B3LYP/6-31G\* vibrational frequencies and temperature (195 K). The free energy correction ( $G_{\text{corr}}$ ) was obtained from  $G_{\text{corr}} = H_{\text{corr}} - TS_{\text{tot}}$ ; relative free energies  $\Delta G_{195}$  were obtained by comparing values of ( $E_0 + G_{\text{corr}}$ )

|     | R <sub>2</sub> | structure                            | $E_0$<br>(hartrees) | $H_{\text{corr}}$ (195 K)<br>(kcal/mol) | $S_{\text{tot}}$ (195 K)<br>(cal/molK) | $G_{\text{corr}}$ (195 K)<br>(kcal/mol) | $\Delta G_{195}$<br>(kcal/mol) |
|-----|----------------|--------------------------------------|---------------------|-----------------------------------------|----------------------------------------|-----------------------------------------|--------------------------------|
| 13b | Me             | equil.<br>geometry                   | -841.643735         | 176.99                                  | 106.25                                 | 156.3                                   | 0                              |
|     |                | ring inv.<br>transition<br>structure | -841.624731         | 176.63                                  | 101.80                                 | 156.8                                   | 12.4                           |
| 13c | <i>i</i> -Pr   | equil.<br>geometry                   | -920.270594         | 212.51                                  | 114.84                                 | 190.1                                   | 0                              |
|     |                | ring inv.<br>transition<br>structure | -920.243390         | 212.30                                  | 111.76                                 | 190.5                                   | 17.5                           |

#### Coordinates for 13b (B3LYP/6-31G\* equilibrium geometry)

HEADER

REMARK 13b B3LYP/6-31G\* equilibrium geometry

|        |    |   |   |        |        |        |
|--------|----|---|---|--------|--------|--------|
| HETATM | 1  | C | 1 | 0.000  | 0.000  | 0.000  |
| HETATM | 2  | C | 1 | 0.000  | 0.000  | 1.417  |
| HETATM | 3  | C | 1 | 1.212  | 0.000  | -0.707 |
| HETATM | 4  | N | 1 | -1.249 | -0.074 | -0.695 |
| HETATM | 5  | C | 1 | 2.440  | -0.045 | -0.045 |
| HETATM | 6  | C | 1 | 1.260  | -0.015 | 2.058  |
| HETATM | 7  | H | 1 | 1.191  | 0.006  | -1.792 |
| HETATM | 8  | C | 1 | -1.246 | -0.724 | -1.997 |
| HETATM | 9  | C | 1 | -1.243 | 0.175  | 2.192  |
| HETATM | 10 | C | 1 | -2.084 | 1.095  | -0.638 |
| HETATM | 11 | C | 1 | 2.458  | -0.052 | 1.351  |
| HETATM | 12 | H | 1 | 3.365  | -0.075 | -0.616 |
| HETATM | 13 | H | 1 | 1.284  | 0.008  | 3.143  |
| HETATM | 14 | H | 1 | -0.799 | -0.119 | -2.801 |
| HETATM | 15 | N | 1 | -2.194 | 1.039  | 1.838  |
| HETATM | 16 | C | 1 | -1.389 | -0.417 | 3.532  |
| HETATM | 17 | C | 1 | -2.439 | 1.611  | 0.665  |
| HETATM | 18 | O | 1 | -2.587 | 1.519  | -1.693 |
| HETATM | 19 | H | 1 | -2.279 | -0.925 | -2.289 |
| HETATM | 20 | H | 1 | -0.698 | -1.668 | -1.913 |
| HETATM | 21 | H | 1 | 3.404  | -0.074 | 1.890  |

```

HETATM 22 C 1 -2.313 0.117 4.467
HETATM 23 C 1 -0.690 -1.579 3.940
HETATM 24 C 1 -3.447 2.743 0.648
HETATM 25 C 1 -0.878 -2.146 5.200
HETATM 26 C 1 -2.495 -0.449 5.722
HETATM 27 H 1 -2.882 0.989 4.163
HETATM 28 H 1 -0.001 -2.052 3.247
HETATM 29 H 1 -3.027 3.661 0.211
HETATM 30 H 1 -3.756 2.959 1.676
HETATM 31 H 1 -4.337 2.503 0.048
HETATM 32 C 1 -1.777 -1.588 6.112
HETATM 33 H 1 -0.320 -3.043 5.466
HETATM 34 H 1 -3.207 0.004 6.411
HETATM 35 H 1 -1.924 -2.032 7.094
CONNECT 1 2 3 4
CONNECT 2 1 6 9
CONNECT 3 1 5 7
CONNECT 4 1 8 10
CONNECT 5 3 11 12
CONNECT 6 2 11 13
CONNECT 7 3
CONNECT 8 4 14 19 20
CONNECT 9 2 15 16
CONNECT 10 4 17 18
CONNECT 11 5 6 21
CONNECT 12 5
CONNECT 13 6
CONNECT 14 8
CONNECT 15 9 17
CONNECT 16 9 22 23
CONNECT 17 10 15 24
CONNECT 18 10
CONNECT 19 8
CONNECT 20 8
CONNECT 21 11
CONNECT 22 16 26 27
CONNECT 23 16 25 28
CONNECT 24 17 29 30 31
CONNECT 25 23 32 33
CONNECT 26 22 32 34
CONNECT 27 22
CONNECT 28 23
CONNECT 29 24
CONNECT 30 24
CONNECT 31 24
CONNECT 32 25 26 35
CONNECT 33 25
CONNECT 34 26
CONNECT 35 32
END

```

### Coordinates for 13b (B3LYP/6-31G\* ring inversion transition structure)

```

HEADER
REMARK 13b B3LYP/6-31G*
REMARK ring inversion transition structure
HETATM 1 C 1 0.000 0.000 0.000
HETATM 2 C 1 0.000 0.000 1.442
HETATM 3 C 1 1.249 0.000 -0.650

```

|        |    |    |    |    |        |        |        |  |
|--------|----|----|----|----|--------|--------|--------|--|
| HETATM | 4  | N  |    | 1  | -1.148 | -0.071 | -0.845 |  |
| HETATM | 5  | C  |    | 1  | 2.470  | -0.179 | 0.014  |  |
| HETATM | 6  | C  |    | 1  | 1.238  | -0.296 | 2.056  |  |
| HETATM | 7  | H  |    | 1  | 1.286  | 0.127  | -1.723 |  |
| HETATM | 8  | C  |    | 1  | -1.162 | 0.267  | 2.310  |  |
| HETATM | 9  | C  |    | 1  | -0.907 | -0.434 | -2.238 |  |
| HETATM | 10 | C  |    | 1  | -2.534 | 0.166  | -0.553 |  |
| HETATM | 11 | C  |    | 1  | 2.456  | -0.386 | 1.383  |  |
| HETATM | 12 | H  |    | 1  | 3.396  | -0.186 | -0.558 |  |
| HETATM | 13 | H  |    | 1  | 1.236  | -0.444 | 3.129  |  |
| HETATM | 14 | N  |    | 1  | -2.431 | 0.339  | 1.945  |  |
| HETATM | 15 | H  |    | 1  | -1.866 | -0.681 | -2.685 |  |
| HETATM | 16 | C  |    | 1  | -0.984 | 0.568  | 3.759  |  |
| HETATM | 17 | C  |    | 1  | -3.059 | 0.315  | 0.784  |  |
| HETATM | 18 | O  |    | 1  | -3.313 | 0.205  | -1.523 |  |
| HETATM | 19 | H  |    | 1  | -0.466 | 0.388  | -2.824 |  |
| HETATM | 20 | H  |    | 1  | -0.225 | -1.291 | -2.288 |  |
| HETATM | 21 | H  |    | 1  | 3.368  | -0.602 | 1.936  |  |
| HETATM | 22 | C  |    | 1  | -1.967 | 0.142  | 4.684  |  |
| HETATM | 23 | C  |    | 1  | 0.064  | 1.359  | 4.288  |  |
| HETATM | 24 | C  |    | 1  | -4.565 | 0.508  | 0.832  |  |
| HETATM | 25 | C  |    | 1  | 0.130  | 1.684  | 5.642  |  |
| HETATM | 26 | C  |    | 1  | -1.898 | 0.462  | 6.035  |  |
| HETATM | 27 | H  |    | 1  | -2.799 | -0.439 | 4.300  |  |
| HETATM | 28 | H  |    | 1  | 0.826  | 1.746  | 3.618  |  |
| HETATM | 29 | H  |    | 1  | -5.114 | -0.341 | 0.399  |  |
| HETATM | 30 | H  |    | 1  | -4.894 | 1.394  | 0.269  |  |
| HETATM | 31 | H  |    | 1  | -4.864 | 0.625  | 1.878  |  |
| HETATM | 32 | C  |    | 1  | -0.844 | 1.235  | 6.536  |  |
| HETATM | 33 | H  |    | 1  | 0.949  | 2.309  | 5.998  |  |
| HETATM | 34 | H  |    | 1  | -2.674 | 0.101  | 6.709  |  |
| HETATM | 35 | H  |    | 1  | -0.787 | 1.483  | 7.594  |  |
| CONECT | 1  | 2  | 3  | 4  |        |        |        |  |
| CONECT | 2  | 1  | 6  | 8  |        |        |        |  |
| CONECT | 3  | 1  | 5  | 7  |        |        |        |  |
| CONECT | 4  | 1  | 9  | 10 |        |        |        |  |
| CONECT | 5  | 3  | 11 | 12 |        |        |        |  |
| CONECT | 6  | 2  | 11 | 13 |        |        |        |  |
| CONECT | 7  | 3  |    |    |        |        |        |  |
| CONECT | 8  | 2  | 14 | 16 |        |        |        |  |
| CONECT | 9  | 4  | 15 | 19 | 20     |        |        |  |
| CONECT | 10 | 4  | 17 | 18 |        |        |        |  |
| CONECT | 11 | 5  | 6  | 21 |        |        |        |  |
| CONECT | 12 | 5  |    |    |        |        |        |  |
| CONECT | 13 | 6  |    |    |        |        |        |  |
| CONECT | 14 | 8  | 17 |    |        |        |        |  |
| CONECT | 15 | 9  |    |    |        |        |        |  |
| CONECT | 16 | 8  | 22 | 23 |        |        |        |  |
| CONECT | 17 | 10 | 14 | 24 |        |        |        |  |
| CONECT | 18 | 10 |    |    |        |        |        |  |
| CONECT | 19 | 9  |    |    |        |        |        |  |
| CONECT | 20 | 9  |    |    |        |        |        |  |
| CONECT | 21 | 11 |    |    |        |        |        |  |
| CONECT | 22 | 16 | 26 | 27 |        |        |        |  |
| CONECT | 23 | 16 | 25 | 28 |        |        |        |  |
| CONECT | 24 | 17 | 29 | 30 | 31     |        |        |  |
| CONECT | 25 | 23 | 32 | 33 |        |        |        |  |
| CONECT | 26 | 22 | 32 | 34 |        |        |        |  |

```

CONNECT 27 22
CONNECT 28 23
CONNECT 29 24
CONNECT 30 24
CONNECT 31 24
CONNECT 32 25 26 35
CONNECT 33 25
CONNECT 34 26
CONNECT 35 32
END

```

### Coordinates for 13c (B3LYP/6-31G\* equilibrium geometry)

HEADER

REMARK 13c B3LYP/6-31G\* equilibrium geometry

|         |    |   |   |        |        |        |
|---------|----|---|---|--------|--------|--------|
| HETATM  | 1  | C | 1 | 0.000  | 0.000  | 0.000  |
| HETATM  | 2  | C | 1 | 0.000  | 0.000  | 1.414  |
| HETATM  | 3  | C | 1 | 1.210  | 0.000  | -0.712 |
| HETATM  | 4  | N | 1 | -1.273 | -0.022 | -0.664 |
| HETATM  | 5  | C | 1 | 2.431  | -0.106 | -0.050 |
| HETATM  | 6  | C | 1 | 1.255  | -0.097 | 2.061  |
| HETATM  | 7  | H | 1 | 1.182  | 0.045  | -1.798 |
| HETATM  | 8  | C | 1 | -1.431 | -0.837 | -1.880 |
| HETATM  | 9  | C | 1 | -1.233 | 0.314  | 2.154  |
| HETATM  | 10 | C | 1 | -1.824 | 1.314  | -0.705 |
| HETATM  | 11 | C | 1 | 2.447  | -0.166 | 1.349  |
| HETATM  | 12 | H | 1 | 3.359  | -0.142 | -0.617 |
| HETATM  | 13 | H | 1 | 1.281  | -0.092 | 3.147  |
| HETATM  | 14 | H | 1 | -0.922 | -0.369 | -2.742 |
| HETATM  | 15 | N | 1 | -2.056 | 1.290  | 1.766  |
| HETATM  | 16 | C | 1 | -1.479 | -0.242 | 3.495  |
| HETATM  | 17 | C | 1 | -2.162 | 1.883  | 0.580  |
| HETATM  | 18 | O | 1 | -2.104 | 1.854  | -1.790 |
| HETATM  | 19 | C | 1 | -2.922 | -0.953 | -2.235 |
| HETATM  | 20 | C | 1 | -0.863 | -2.247 | -1.664 |
| HETATM  | 21 | H | 1 | 3.392  | -0.242 | 1.884  |
| HETATM  | 22 | C | 1 | -2.372 | 0.390  | 4.395  |
| HETATM  | 23 | C | 1 | -0.901 | -1.458 | 3.932  |
| HETATM  | 24 | H | 1 | -3.471 | -1.408 | -1.401 |
| HETATM  | 25 | H | 1 | -3.046 | -1.591 | -3.120 |
| HETATM  | 26 | H | 1 | -3.345 | 0.029  | -2.446 |
| HETATM  | 27 | H | 1 | -1.356 | -2.722 | -0.807 |
| HETATM  | 28 | H | 1 | 0.213  | -2.249 | -1.474 |
| HETATM  | 29 | H | 1 | -1.053 | -2.860 | -2.554 |
| HETATM  | 30 | C | 1 | -2.938 | 3.183  | 0.527  |
| HETATM  | 31 | C | 1 | -1.171 | -1.986 | 5.194  |
| HETATM  | 32 | C | 1 | -2.637 | -0.139 | 5.652  |
| HETATM  | 33 | H | 1 | -2.846 | 1.308  | 4.065  |
| HETATM  | 34 | H | 1 | -0.244 | -2.001 | 3.260  |
| HETATM  | 35 | H | 1 | -2.305 | 4.026  | 0.209  |
| HETATM  | 36 | H | 1 | -3.330 | 3.406  | 1.524  |
| HETATM  | 37 | H | 1 | -3.769 | 3.141  | -0.191 |
| HETATM  | 38 | C | 1 | -2.038 | -1.334 | 6.073  |
| HETATM  | 39 | H | 1 | -0.706 | -2.927 | 5.487  |
| HETATM  | 40 | H | 1 | -3.322 | 0.386  | 6.317  |
| HETATM  | 41 | H | 1 | -2.251 | -1.748 | 7.056  |
| CONNECT | 1  | 2 | 3 | 4      |        |        |
| CONNECT | 2  | 1 | 6 | 9      |        |        |
| CONNECT | 3  | 1 | 5 | 7      |        |        |

```

CONNECT  4   1   8  10
CONNECT  5   3  11  12
CONNECT  6   2  11  13
CONNECT  7   3
CONNECT  8   4  14  19  20
CONNECT  9   2  15  16
CONNECT 10   4  17  18
CONNECT 11   5   6  21
CONNECT 12   5
CONNECT 13   6
CONNECT 14   8
CONNECT 15   9  17
CONNECT 16   9  22  23
CONNECT 17  10  15  30
CONNECT 18  10
CONNECT 19   8  24  25  26
CONNECT 20   8  27  28  29
CONNECT 21  11
CONNECT 22  16  32  33
CONNECT 23  16  31  34
CONNECT 24  19
CONNECT 25  19
CONNECT 26  19
CONNECT 27  20
CONNECT 28  20
CONNECT 29  20
CONNECT 30  17  35  36  37
CONNECT 31  23  38  39
CONNECT 32  22  38  40
CONNECT 33  22
CONNECT 34  23
CONNECT 35  30
CONNECT 36  30
CONNECT 37  30
CONNECT 38  31  32  41
CONNECT 39  31
CONNECT 40  32
CONNECT 41  38
END

```

### Coordinates for 13c (B3LYP/6-31G\* ring inversion transition structure)

HEADER

REMARK 13c B3LYP/6-31G\*

REMARK ring inversion transition structure

|        |    |   |   |        |        |        |
|--------|----|---|---|--------|--------|--------|
| HETATM | 1  | C | 1 | 0.000  | 0.000  | 0.000  |
| HETATM | 2  | C | 1 | 0.000  | 0.000  | 2.860  |
| HETATM | 3  | C | 1 | 1.254  | 0.000  | 0.713  |
| HETATM | 4  | C | 1 | -1.154 | -0.229 | 0.774  |
| HETATM | 5  | C | 1 | -1.178 | -0.236 | 2.172  |
| HETATM | 6  | C | 1 | 1.175  | 0.107  | 2.120  |
| HETATM | 7  | H | 1 | -2.095 | -0.388 | 0.275  |
| HETATM | 8  | H | 1 | -2.122 | -0.400 | 2.689  |
| HETATM | 9  | H | 1 | 2.108  | 0.248  | 2.654  |
| HETATM | 10 | H | 1 | 0.026  | 0.074  | 3.945  |
| HETATM | 11 | N | 1 | -0.192 | 0.233  | -1.400 |
| HETATM | 12 | C | 1 | 2.608  | -0.105 | 0.128  |
| HETATM | 13 | N | 1 | 2.947  | 0.150  | -1.119 |
| HETATM | 14 | C | 1 | -1.558 | 0.510  | -1.924 |

|         |    |    |    |    |        |        |        |
|---------|----|----|----|----|--------|--------|--------|
| HETATM  | 15 | H  |    | 1  | -1.339 | 0.859  | -2.931 |
| HETATM  | 16 | C  |    | 1  | 3.758  | -0.569 | 0.949  |
| HETATM  | 17 | C  |    | 1  | 6.068  | -1.518 | 2.345  |
| HETATM  | 18 | C  |    | 1  | 5.059  | -0.083 | 0.669  |
| HETATM  | 19 | C  |    | 1  | 3.672  | -1.564 | 1.952  |
| HETATM  | 20 | C  |    | 1  | 4.799  | -2.027 | 2.630  |
| HETATM  | 21 | C  |    | 1  | 6.181  | -0.541 | 1.349  |
| HETATM  | 22 | H  |    | 1  | 5.158  | 0.659  | -0.117 |
| HETATM  | 23 | H  |    | 1  | 2.704  | -1.995 | 2.189  |
| HETATM  | 24 | H  |    | 1  | 4.681  | -2.804 | 3.385  |
| HETATM  | 25 | H  |    | 1  | 7.159  | -0.126 | 1.104  |
| HETATM  | 26 | C  |    | 1  | 0.818  | 0.412  | -2.427 |
| HETATM  | 27 | C  |    | 1  | 2.244  | 0.410  | -2.209 |
| HETATM  | 28 | O  |    | 1  | 0.408  | 0.579  | -3.593 |
| HETATM  | 29 | C  |    | 1  | -2.419 | -0.747 | -2.160 |
| HETATM  | 30 | H  |    | 1  | -2.745 | -1.271 | -1.257 |
| HETATM  | 31 | H  |    | 1  | -1.849 | -1.455 | -2.771 |
| HETATM  | 32 | H  |    | 1  | -3.321 | -0.467 | -2.722 |
| HETATM  | 33 | C  |    | 1  | -2.291 | 1.688  | -1.253 |
| HETATM  | 34 | H  |    | 1  | -2.680 | 1.493  | -0.251 |
| HETATM  | 35 | H  |    | 1  | -3.138 | 1.977  | -1.890 |
| HETATM  | 36 | H  |    | 1  | -1.616 | 2.549  | -1.184 |
| HETATM  | 37 | H  |    | 1  | 6.946  | -1.875 | 2.880  |
| HETATM  | 38 | C  |    | 1  | 3.052  | 0.635  | -3.476 |
| HETATM  | 39 | H  |    | 1  | 2.836  | 1.605  | -3.947 |
| HETATM  | 40 | H  |    | 1  | 2.851  | -0.123 | -4.248 |
| HETATM  | 41 | H  |    | 1  | 4.115  | 0.598  | -3.217 |
| CONNECT | 1  | 3  | 4  | 11 |        |        |        |
| CONNECT | 2  | 5  | 6  | 10 |        |        |        |
| CONNECT | 3  | 1  | 6  | 12 |        |        |        |
| CONNECT | 4  | 1  | 5  | 7  |        |        |        |
| CONNECT | 5  | 2  | 4  | 8  |        |        |        |
| CONNECT | 6  | 2  | 3  | 9  |        |        |        |
| CONNECT | 7  | 4  |    |    |        |        |        |
| CONNECT | 8  | 5  |    |    |        |        |        |
| CONNECT | 9  | 6  |    |    |        |        |        |
| CONNECT | 10 | 2  |    |    |        |        |        |
| CONNECT | 11 | 1  | 14 | 26 |        |        |        |
| CONNECT | 12 | 3  | 13 | 16 |        |        |        |
| CONNECT | 13 | 12 | 27 |    |        |        |        |
| CONNECT | 14 | 11 | 15 | 29 | 33     |        |        |
| CONNECT | 15 | 14 |    |    |        |        |        |
| CONNECT | 16 | 12 | 18 | 19 |        |        |        |
| CONNECT | 17 | 20 | 21 | 37 |        |        |        |
| CONNECT | 18 | 16 | 21 | 22 |        |        |        |
| CONNECT | 19 | 16 | 20 | 23 |        |        |        |
| CONNECT | 20 | 17 | 19 | 24 |        |        |        |
| CONNECT | 21 | 17 | 18 | 25 |        |        |        |
| CONNECT | 22 | 18 |    |    |        |        |        |
| CONNECT | 23 | 19 |    |    |        |        |        |
| CONNECT | 24 | 20 |    |    |        |        |        |
| CONNECT | 25 | 21 |    |    |        |        |        |
| CONNECT | 26 | 11 | 27 | 28 |        |        |        |
| CONNECT | 27 | 13 | 26 | 38 |        |        |        |
| CONNECT | 28 | 26 |    |    |        |        |        |
| CONNECT | 29 | 14 | 30 | 31 | 32     |        |        |
| CONNECT | 30 | 29 |    |    |        |        |        |
| CONNECT | 31 | 29 |    |    |        |        |        |

```

CONNECT 32 29
CONNECT 33 14 34 35 36
CONNECT 34 33
CONNECT 35 33
CONNECT 36 33
CONNECT 37 17
CONNECT 38 27 39 40 41
CONNECT 39 38
CONNECT 40 38
CONNECT 41 38
END

```

- [1] Sternbach, L. H.; Fryer, R. I.; Metlesics, W.; Reeder, E.; Sach, G.; Saucy, G.; Stempel, A. *J. Org. Chem.* **1962**, 27, 3788-3796.
- [2] Hart, B. R.; Rush, D. J.; Shea, K. J. *J. Am. Chem. Soc.* **2000**, 122, 460-465.
- [3] Beard, C. D.; Baum, K.; Grakauskas, V. *J. Org. Chem.* **1973**, 38, 3673-3677.
- [4] Sunjic, V.; Kajfez, F.; Stromar, I.; Blazevic, N.; Kolbah, D. *J. Heterocyclic Chem.* **1973**, 10, 591-599.
- [5] Linscheid, P.; Lehn, J.-M. *Bull. Chim. Soc. Fr.* **1967**, 992-997.
- [6] Perrin, C. L.; Dwyer, T. J. *Chem. Rev.* **1990**, 90, 935-967.

Project Name: HONGWU  
Reported by User: JOE

S16

Breeze

## SAMPLE INFORMATION

Sample Name: HWZ-ILP137  
Sample Type: Unknown  
Vial: 1  
Injection #: 1  
Injection Volume: 10.00 ul  
Run Time: 25.00 Minutes

Acquired By: HongWu  
Date Acquired: 3/5/03 1:14:04 PM  
Acq. Method: 10%B Isopropanol  
Date Processed: 3/5/03 1:44:16 PM  
Channel Name: 2487Channel 1  
Sample Set Name: Hongw u

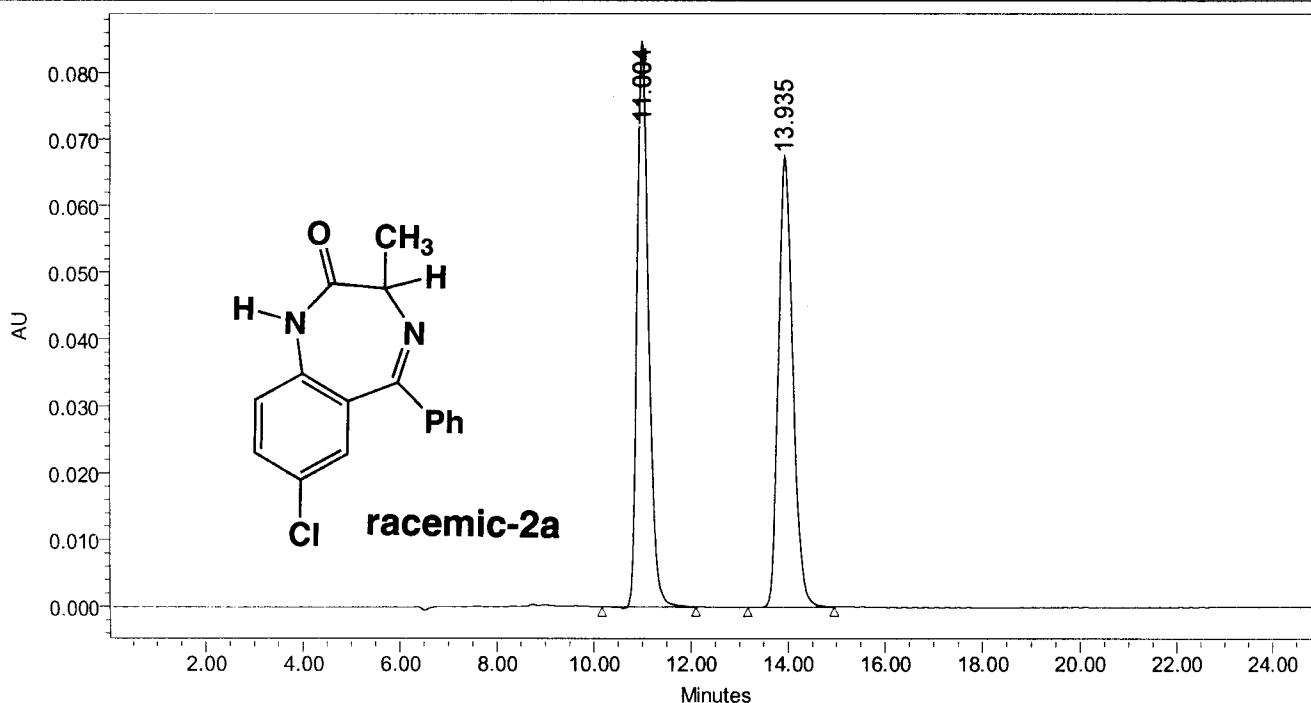

|   | RT<br>(min) | Area<br>( $\mu\text{V}\cdot\text{sec}$ ) | % Area | Height<br>( $\mu\text{V}$ ) | %<br>Height |
|---|-------------|------------------------------------------|--------|-----------------------------|-------------|
| 1 | 11.004      | 1399071                                  | 50.06  | 84693                       | 55.67       |
| 2 | 13.935      | 1395552                                  | 49.94  | 67429                       | 44.33       |



Project Name: HONGWU  
Reported by User: JOE

S17

Breeze

## SAMPLE INFORMATION

Sample Name: HWZ-III-P15  
Sample Type: Unknown  
Vial: 1  
Injection #: 1  
Injection Volume: 10.00 ul  
Run Time: 25.00 Minutes

Acquired By: HongWu  
Date Acquired: 3/5/03 2:04:42 PM  
Acq. Method: 10%B Isopropanol  
Date Processed: 3/5/03 2:30:59 PM  
Channel Name: 2487Channel 1  
Sample Set Name: Hongwu

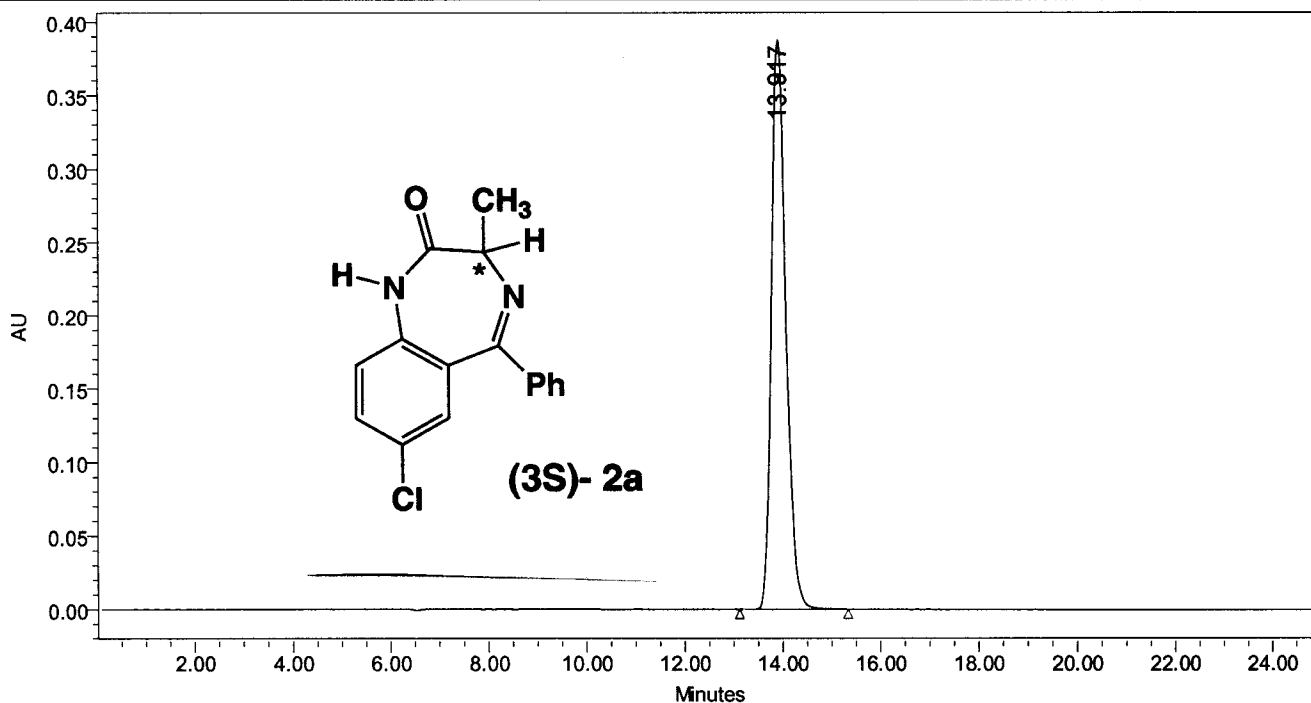

|   | RT<br>(min) | Area<br>( $\mu\text{V}\cdot\text{sec}$ ) | % Area | Height<br>( $\mu\text{V}$ ) | %<br>Height |
|---|-------------|------------------------------------------|--------|-----------------------------|-------------|
| 1 | 13.917      | 7930531                                  | 100.00 | 387021                      | 100.00      |

Project Name: HONGWU  
Reported by User: JOE

S18

Breeze

## SAMPLE INFORMATION

Sample Name: HWZ-ILP143  
Sample Type: Unknown  
Vial: 1  
Injection #: 1  
Injection Volume: 10.00  $\mu$ l  
Run Time: 30.00 Minutes

Acquired By: HongWu  
Date Acquired: 3/13/03 12:04:49 PM  
Acq. Method: 5%B Isopropanol  
Date Processed: 3/13/03 2:00:01 PM  
Channel Name: 2487Channel 1  
Sample Set Name: Hongw u

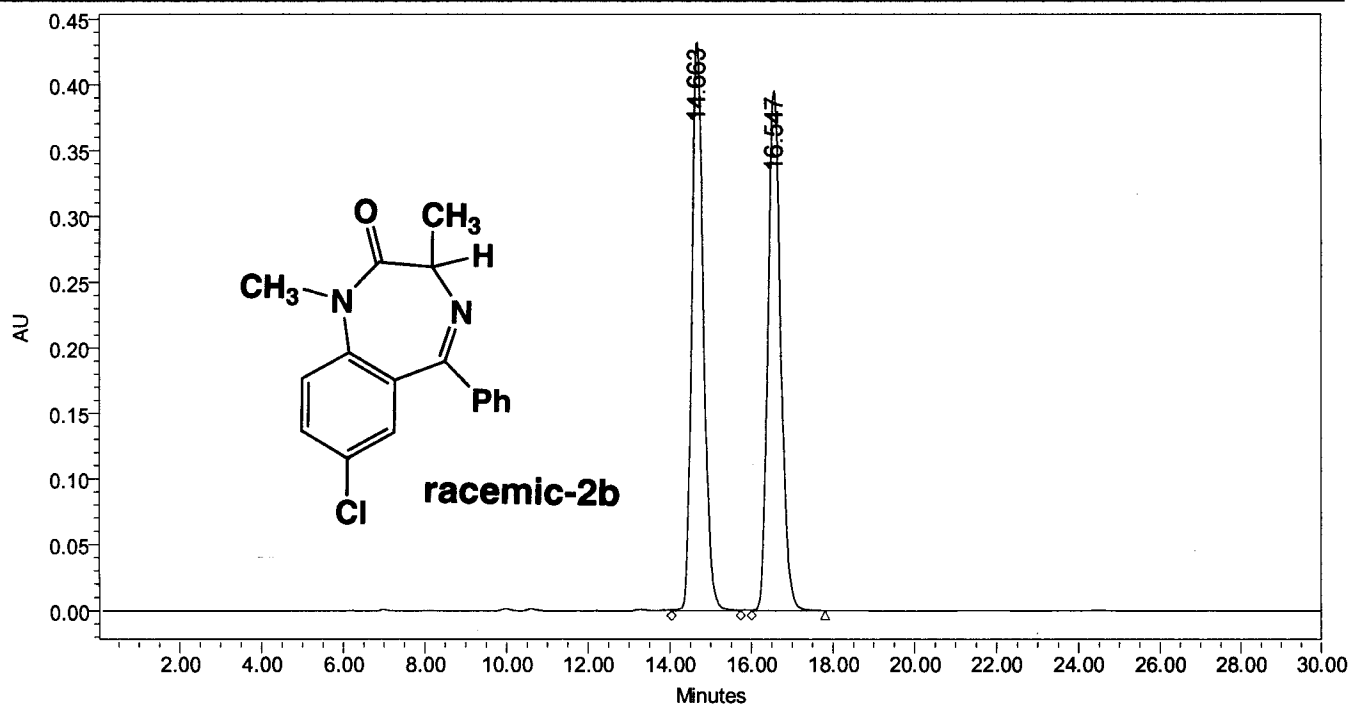

|   | RT<br>(min) | Area<br>( $\mu$ V*sec) | % Area | Height<br>( $\mu$ V) | %<br>Height |
|---|-------------|------------------------|--------|----------------------|-------------|
| 1 | 14.663      | 8608993                | 50.02  | 432337               | 52.28       |
| 2 | 16.547      | 8603447                | 49.98  | 394697               | 47.72       |

Project Name: HONGWU  
Reported by User: JOE

S 19

Breeze

## SAMPLE INFORMATION

Sample Name: HWZ-III-P121  
Sample Type: Unknown  
Vial: 1  
Injection #: 1  
Injection Volume: 10.00 ul  
Run Time: 30.00 Minutes

Acquired By: HongWu  
Date Acquired: 3/13/03 1:00:03 PM  
Acq. Method: 5%B Isopropanol  
Date Processed: 3/13/03 1:58:04 PM  
Channel Name: 2487Channel 1  
Sample Set Name: Hongw u

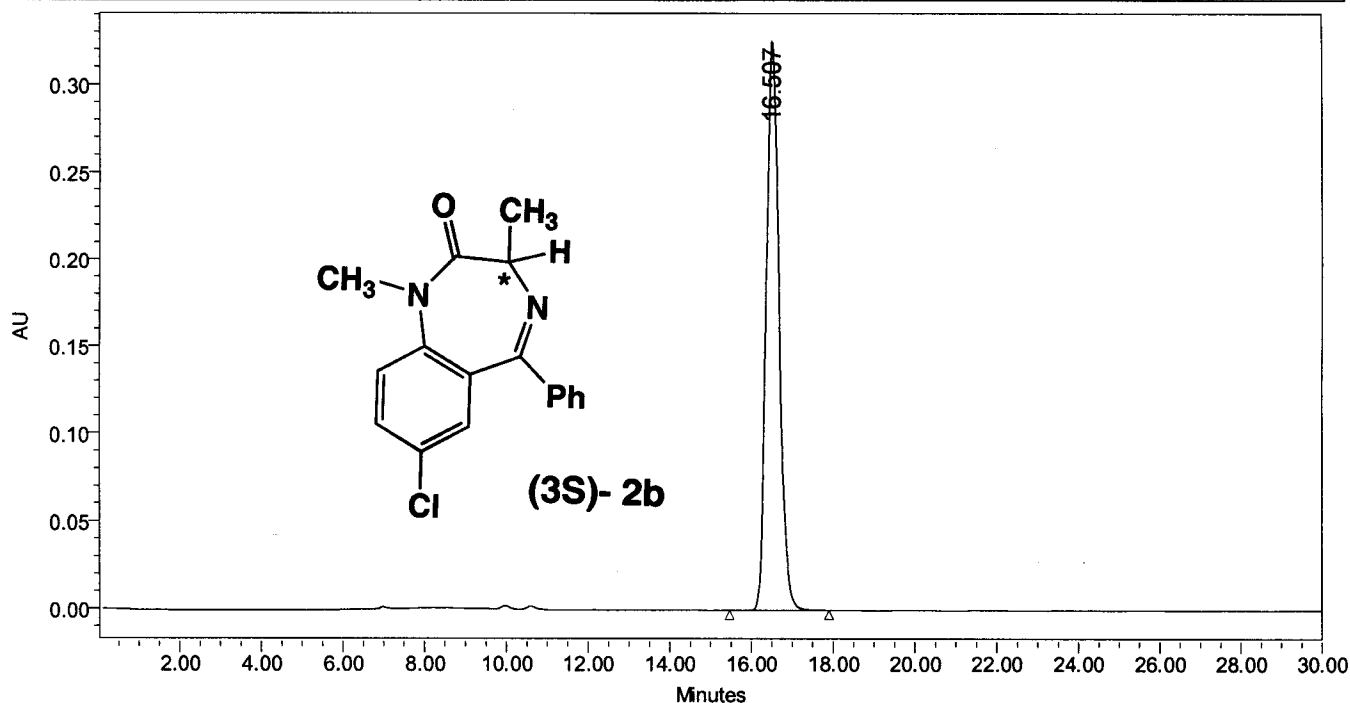

|   | RT<br>(min) | Area<br>( $\mu\text{V}\cdot\text{sec}$ ) | % Area | Height<br>( $\mu\text{V}$ ) | %<br>Height |
|---|-------------|------------------------------------------|--------|-----------------------------|-------------|
| 1 | 16.507      | 7107896                                  | 100.00 | 325693                      | 100.00      |

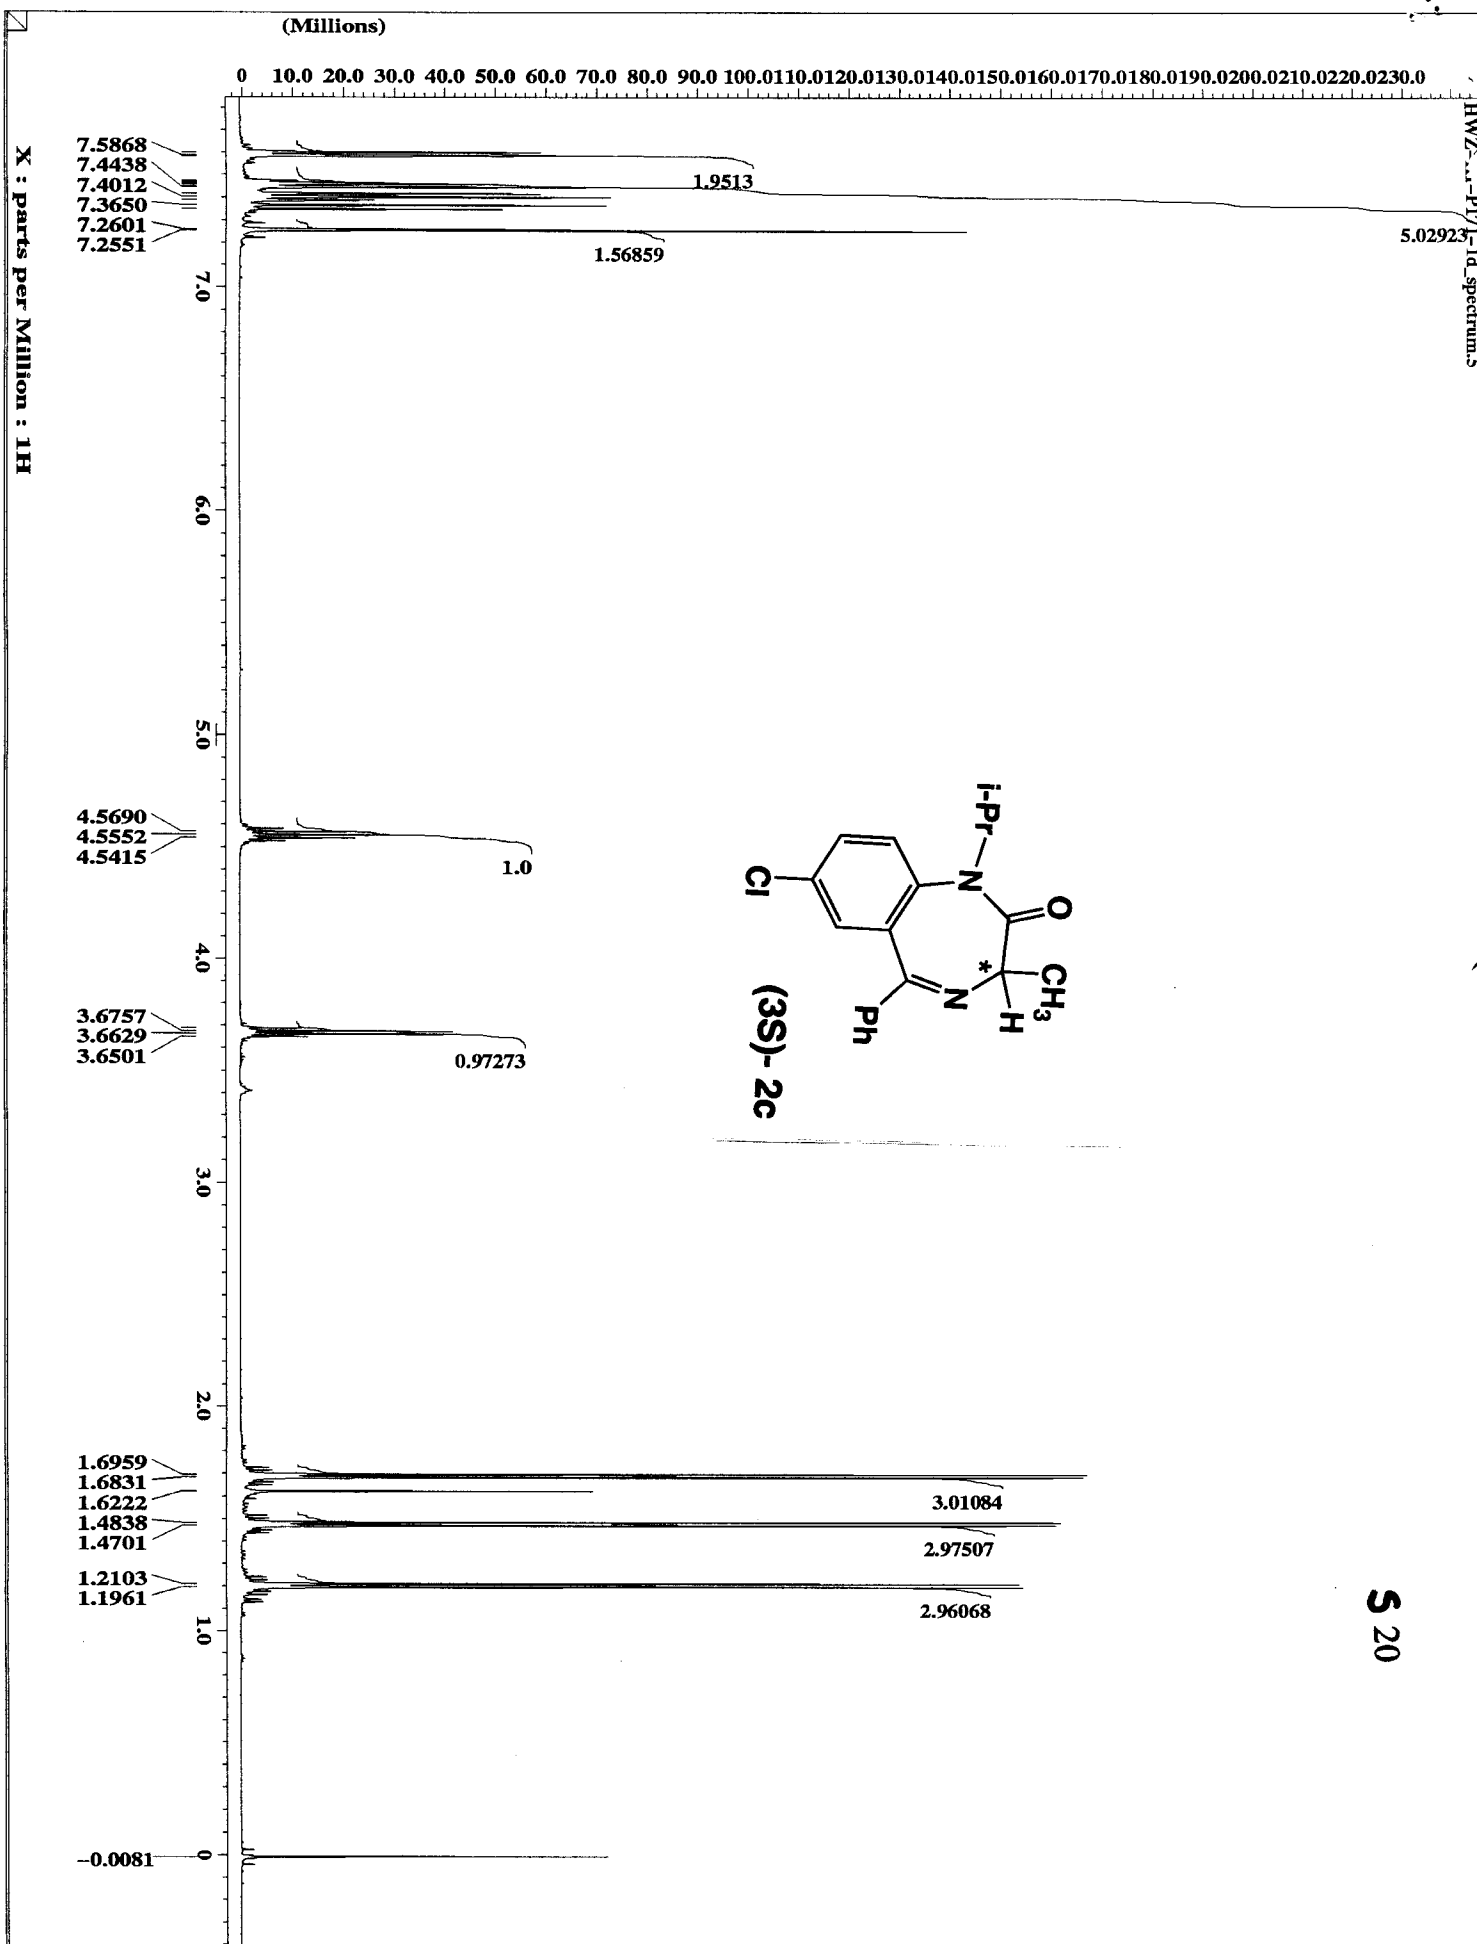

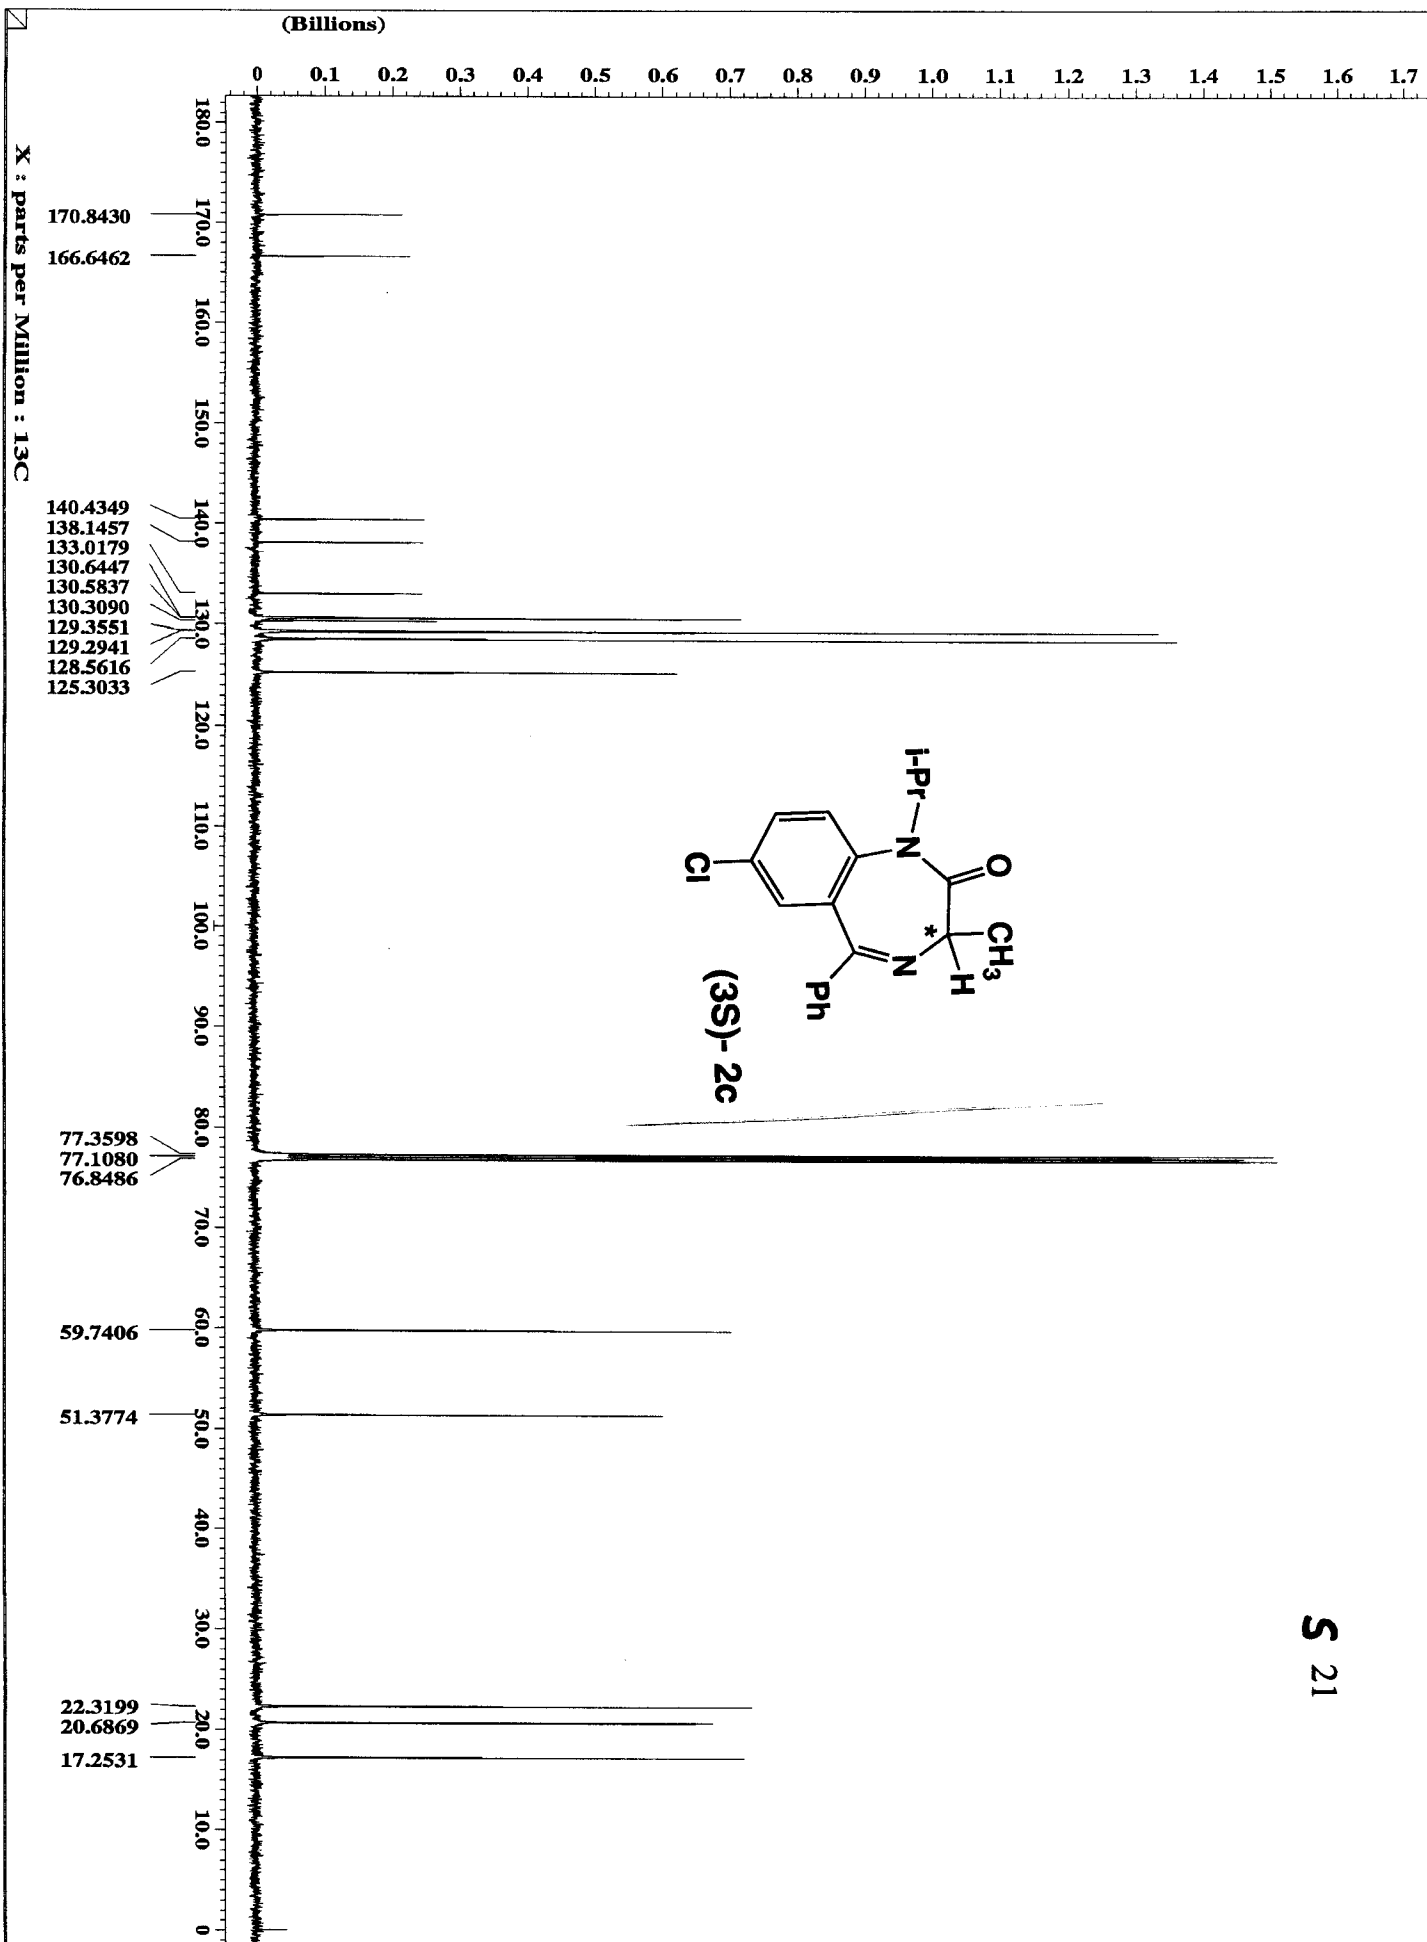

Project Name: HONGWU  
Reported by User: JOE

## SAMPLE INFORMATION

Sample Name: HWZ-II-P161  
Sample Type: Unknown  
Vial: 1  
Injection #: 1  
Injection Volume: 10.00 ul  
Run Time: 25.00 Minutes

Acquired By: HongWu  
Date Acquired: 2/26/03 12:23:29 PM  
Acq. Method: 1%B  
Date Processed: 2/26/03 12:48:43 PM  
Channel Name: 2487Channel 1  
Sample Set Name: Hongwu

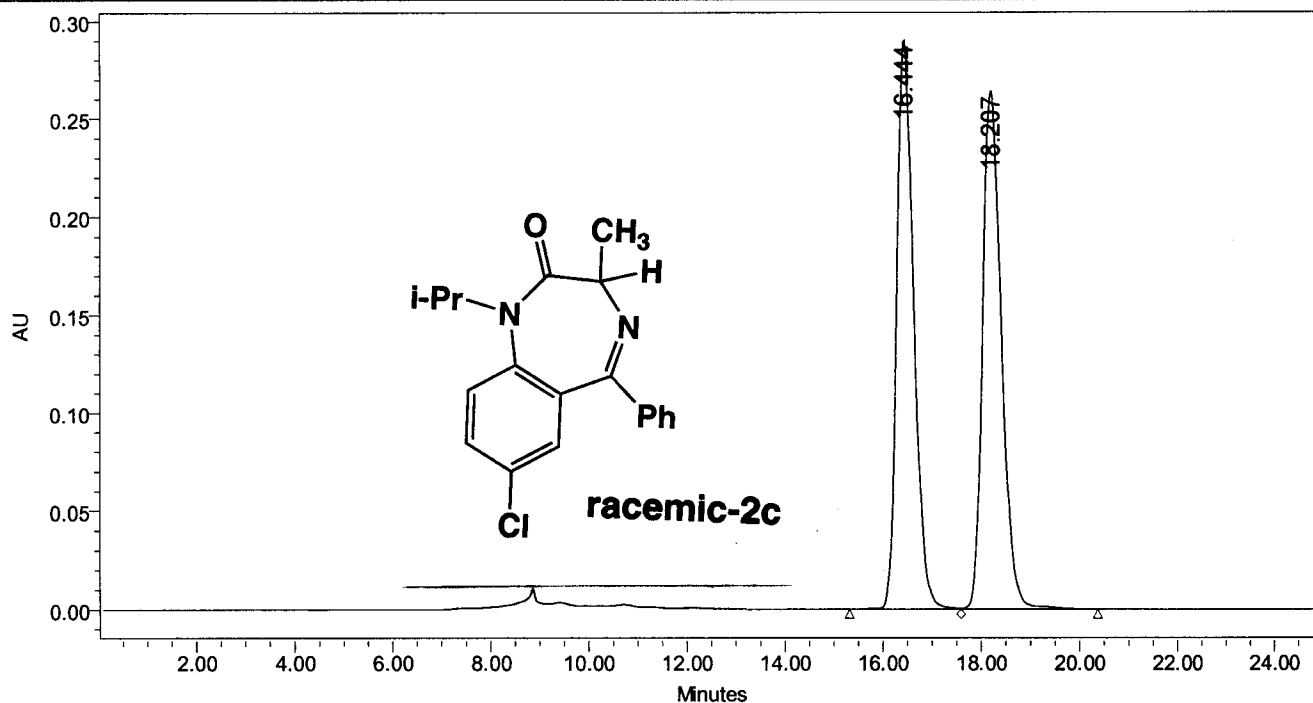

|   | RT<br>(min) | Area<br>( $\mu\text{V}\cdot\text{sec}$ ) | % Area | Height<br>( $\mu\text{V}$ ) | %<br>Height |
|---|-------------|------------------------------------------|--------|-----------------------------|-------------|
| 1 | 16.444      | 6947419                                  | 49.90  | 289950                      | 52.36       |
| 2 | 18.207      | 6975494                                  | 50.10  | 263840                      | 47.64       |

Project Name: HONGWU  
Reported by User: JOE

S 23

Breeze

## SAMPLE INFORMATION

Sample Name: HWZ-III-P109  
Sample Type: Unknown  
Vial: 1  
Injection #: 1  
Injection Volume: 10.00 ul  
Run Time: 25.00 Minutes

Acquired By: HongWu  
Date Acquired: 2/26/03 11:32:02 AM  
Acq. Method: 1%B  
Date Processed: 2/26/03 11:57:16 AM  
Channel Name: 2487Channel 1  
Sample Set Name: Hongw u

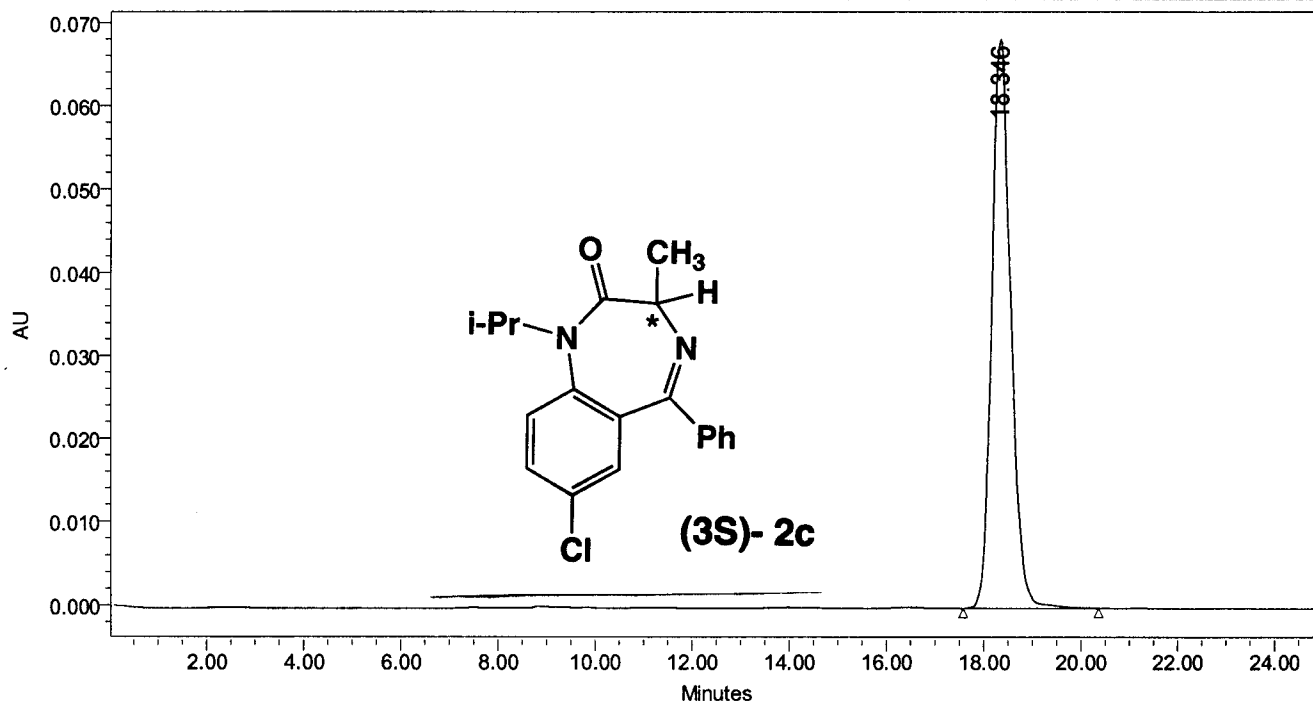

|   | RT<br>(min) | Area<br>( $\mu\text{V}\cdot\text{sec}$ ) | % Area | Height<br>( $\mu\text{V}$ ) | %<br>Height |
|---|-------------|------------------------------------------|--------|-----------------------------|-------------|
| 1 | 18.346      | 1849662                                  | 100.00 | 68272                       | 100.00      |

Project Name: Joe\_Chiral  
Reported by User: JOE

S 24 Breeze

## SAMPLE INFORMATION

Sample Name: JCD-II-73  
Sample Type: Unknown  
Vial: 1  
Injection #: 1  
Injection Volume: 10.00 ul  
Run Time: 40.00 Minutes

Acquired By: JOE  
Date Acquired: 2/7/03 4:21:48 PM  
Acq. Method: 3% B  
Date Processed: 2/7/03 5:44:12 PM  
Channel Name: 2487Channel 1  
Sample Set Name: JOE

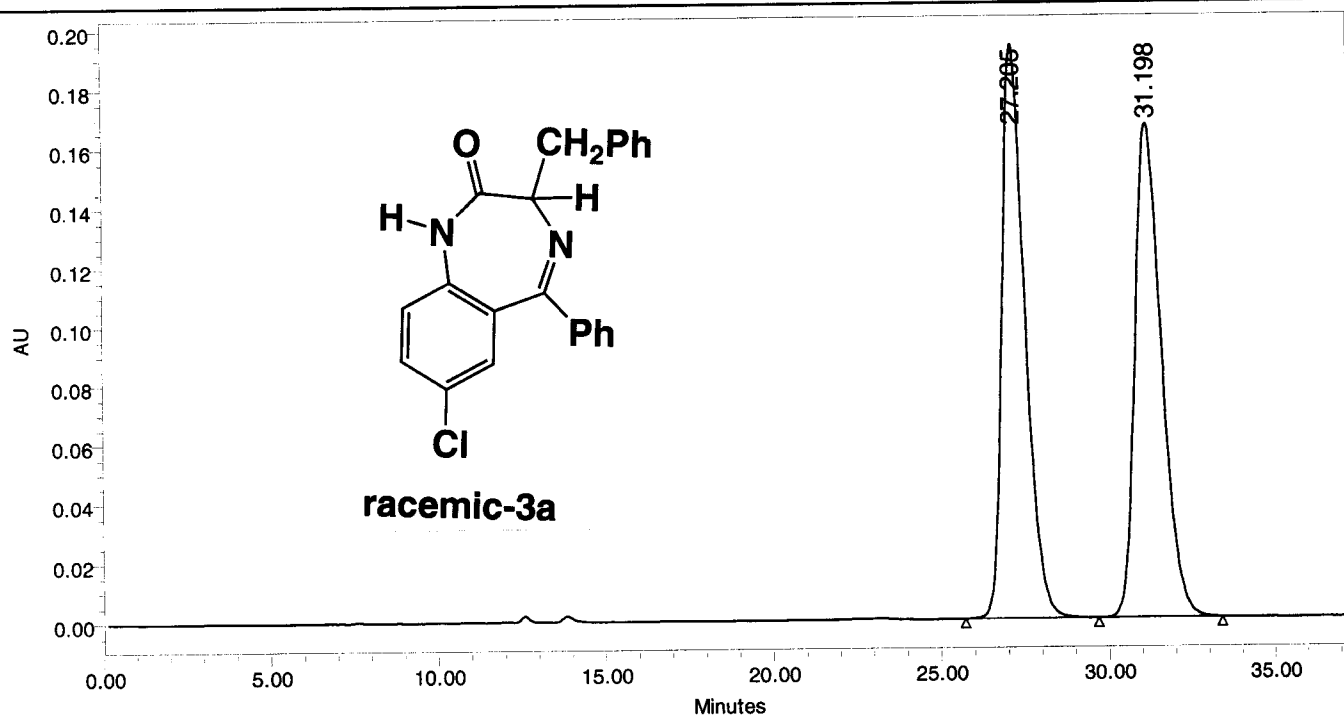

|   | RT<br>(min) | Area<br>( $\mu\text{V}\cdot\text{sec}$ ) | % Area | Height<br>( $\mu\text{V}$ ) | %<br>Height |
|---|-------------|------------------------------------------|--------|-----------------------------|-------------|
| 1 | 27.205      | 9158208                                  | 49.86  | 193589                      | 53.77       |
| 2 | 31.198      | 9209905                                  | 50.14  | 166470                      | 46.23       |



Project Name: Joe\_Chiral  
Reported by User: JOE

S 25 Breeze

## SAMPLE INFORMATION

Sample Name: JCD-III-120(6-10)  
Sample Type: Unknown  
Vial: 1  
Injection #: 1  
Injection Volume: 10.00 ul  
Run Time: 40.00 Minutes

Acquired By: JOE  
Date Acquired: 2/7/03 5:02:03 PM  
Acq. Method: 3% B  
Date Processed: 2/7/03 5:42:20 PM  
Channel Name: 2487Channel 1  
Sample Set Name: JOE

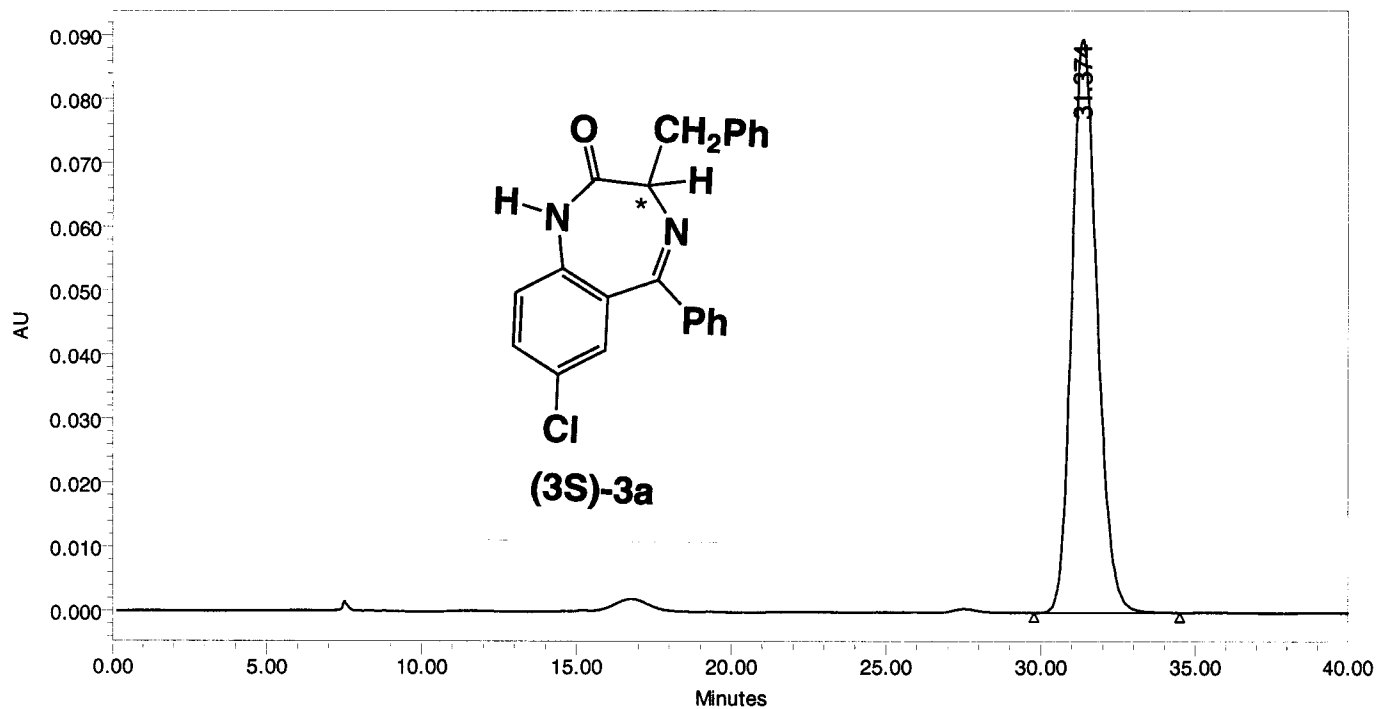

|   | RT<br>(min) | Area<br>( $\mu\text{V}\cdot\text{sec}$ ) | % Area | Height<br>( $\mu\text{V}$ ) | %<br>Height |
|---|-------------|------------------------------------------|--------|-----------------------------|-------------|
| 1 | 31.374      | 5110168                                  | 100.00 | 89533                       | 100.00      |

JCD-III-187-06-01-03.3

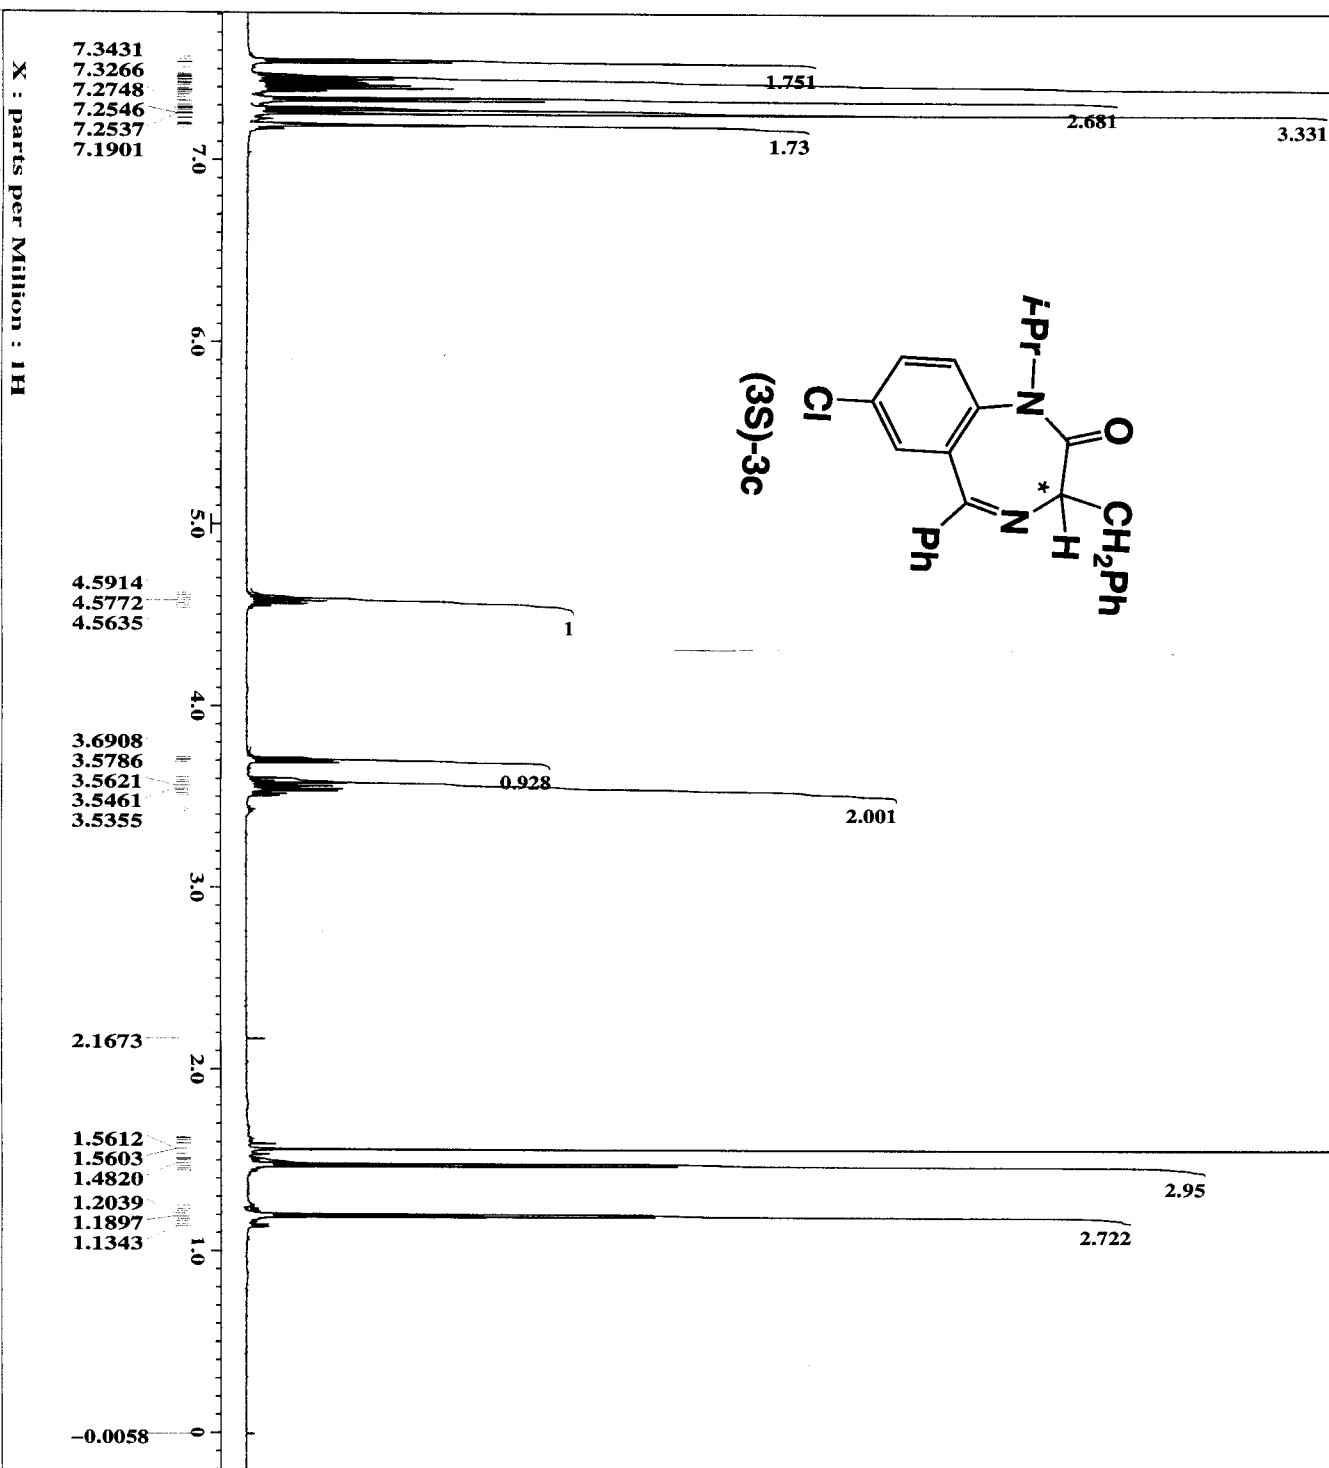

----- ACQUISITION PARAMETERS -----  
 Derived from: JCD-III-187-06-01-03.1  
 File Name = JCD-III-187-06-01-03.  
 Author = carlier  
 Sample ID = JCD-III-187-06-01-03  
 Content = Single Pulse Experiment  
 Creation Date = 1-JUN-2003 19:19:20  
 Revision Date = 4-JUN-2003 13:53:35  
 Spec Site = Eclipse+ 500  
 Spec Type = DELTA\_NMR  
 Data Format = 1D COMPLEX  
 Dimensions = X  
 Dim Title = 1H  
 Dim Size = 32768  
 Dim Units = [ppm]  
 Field strength = 11.7473579 [T] (500 [MH  
 X acq duration = 4.3646976 [s]  
 X domain = 1H  
 X freq = 500.15991521 [MHz]  
 X offset = 51 [ppm]  
 X points = 32768  
 X prescans = 0  
 X resolution = 0.22911095 [Hz]  
 X sweep = 7.50750751 [KHz]  
 Mod return = 1  
 Scans = 32  
 Total\_scans = 32  
 X 90\_width = 11.5 [us]  
 X acq\_time = 4.3646976 [s]  
 X angle = 30 [deg]  
 X pulse = 3.83333333 [us]  
 Initial\_wait = 1 [s]  
 Phase preset = 3 [us]  
 Relaxation\_delay = 1 [s]  
 Unblank\_time = 2 [us]

jcd-111-17-5

pad=2.5 run with findz0 before acquisition

Archive directory: /export/home/robot/vnmrSYS/data  
 Sample directory: jcd-111-17-5\_loc1\_2003-05-06

Pulse Sequence: s2pul1

Solvent: CDCl<sub>3</sub>  
 Ambient temperature  
 File: CARBON\_01  
 INOVA-400 "Inova400"

Relax. delay 1.000 sec  
 Pulse 45.0 degrees  
 Acq. time 1.139 sec  
 Width 25141.4 Hz  
 10000 repetitions  
 OBSERVE C13, 100.5654514 MHz  
 DECOUPLE H1, 399.9438386 MHz  
 Power 45 dB  
 continuously on  
 WALTZ-16 modulated  
 DATA PROCESSING  
 Line broadening 1.0 Hz  
 FT size 65536  
 Total time 6 hr, 8 min, 2 sec  
 May 8 2003  
 VA Tech Chemistry NMR Lab

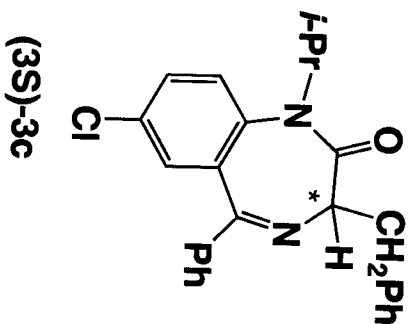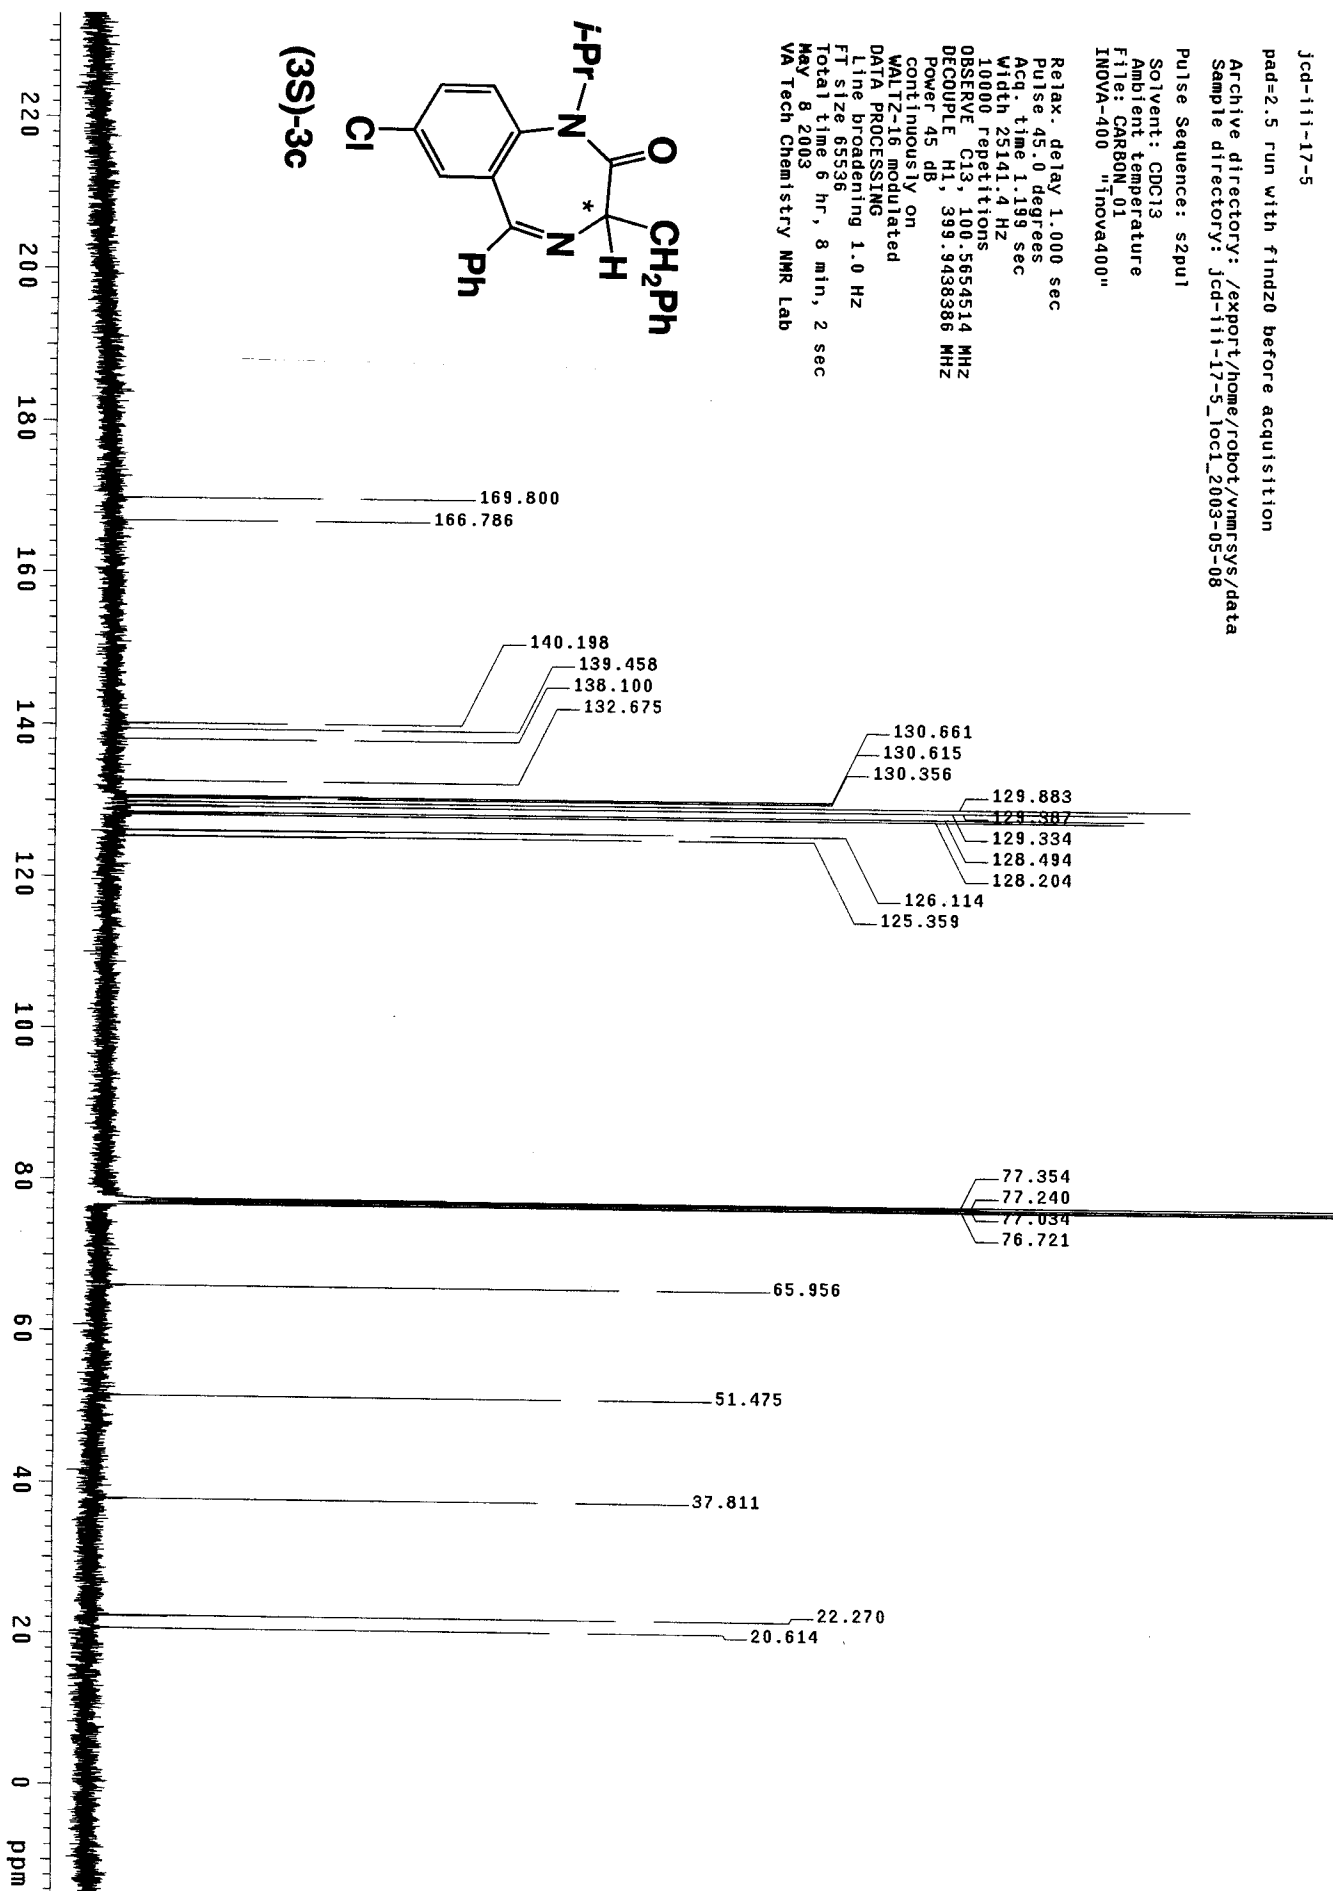

Project Name: Joe\_Chiral  
Reported by User: JOE

528 Breeze

## SAMPLE INFORMATION

Sample Name: JCD-III-159-175AD  
Sample Type: Unknown  
Vial: 1  
Injection #: 1  
Injection Volume: 10.00 ul  
Run Time: 30.00 Minutes

Acquired By: JOE  
Date Acquired: 4/24/03 12:35:25 PM  
Acq. Method: 5% B  
Date Processed: 4/24/03 1:25:06 PM  
Channel Name: 2487Channel 1  
Sample Set Name: JOE

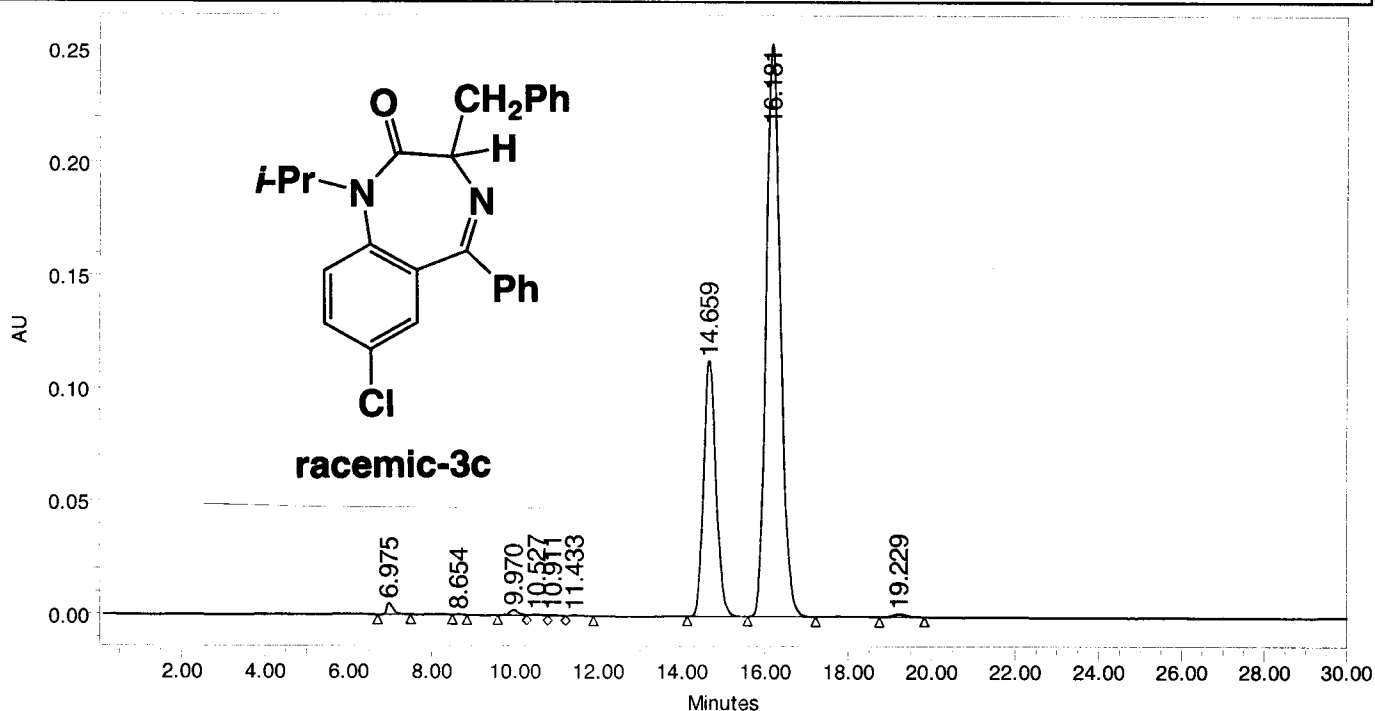

|   | RT<br>(min) | Area<br>( $\mu\text{V}\cdot\text{sec}$ ) | % Area | Height<br>( $\mu\text{V}$ ) | %<br>Height |
|---|-------------|------------------------------------------|--------|-----------------------------|-------------|
| 1 | 6.975       | 54925                                    | 0.64   | 5048                        | 1.34        |
| 2 | 8.654       | 2833                                     | 0.03   | 294                         | 0.08        |
| 3 | 9.970       | 35070                                    | 0.41   | 2307                        | 0.61        |
| 4 | 10.527      | 11620                                    | 0.14   | 532                         | 0.14        |
| 5 | 10.911      | 5919                                     | 0.07   | 402                         | 0.11        |
| 6 | 11.433      | 6398                                     | 0.07   | 342                         | 0.09        |
| 7 | 14.659      | 2340778                                  | 27.43  | 113126                      | 30.00       |
| 8 | 16.181      | 6046821                                  | 70.86  | 253754                      | 67.30       |
| 9 | 19.229      | 29593                                    | 0.35   | 1270                        | 0.34        |

Project Name: Joe\_Chiral  
Reported by User: JOE

S29 Breeze

## SAMPLE INFORMATION

Sample Name: JCD-III-159AD  
Sample Type: Unknown  
Vial: 2  
Injection #: 1  
Injection Volume: 10.00 ul  
Run Time: 30.00 Minutes

Acquired By: JOE  
Date Acquired: 3/28/03 1:28:14 PM  
Acq. Method: 5% B  
Date Processed: 6/9/03 1:38:58 PM  
Channel Name: 2487Channel 1  
Sample Set Name: JOE

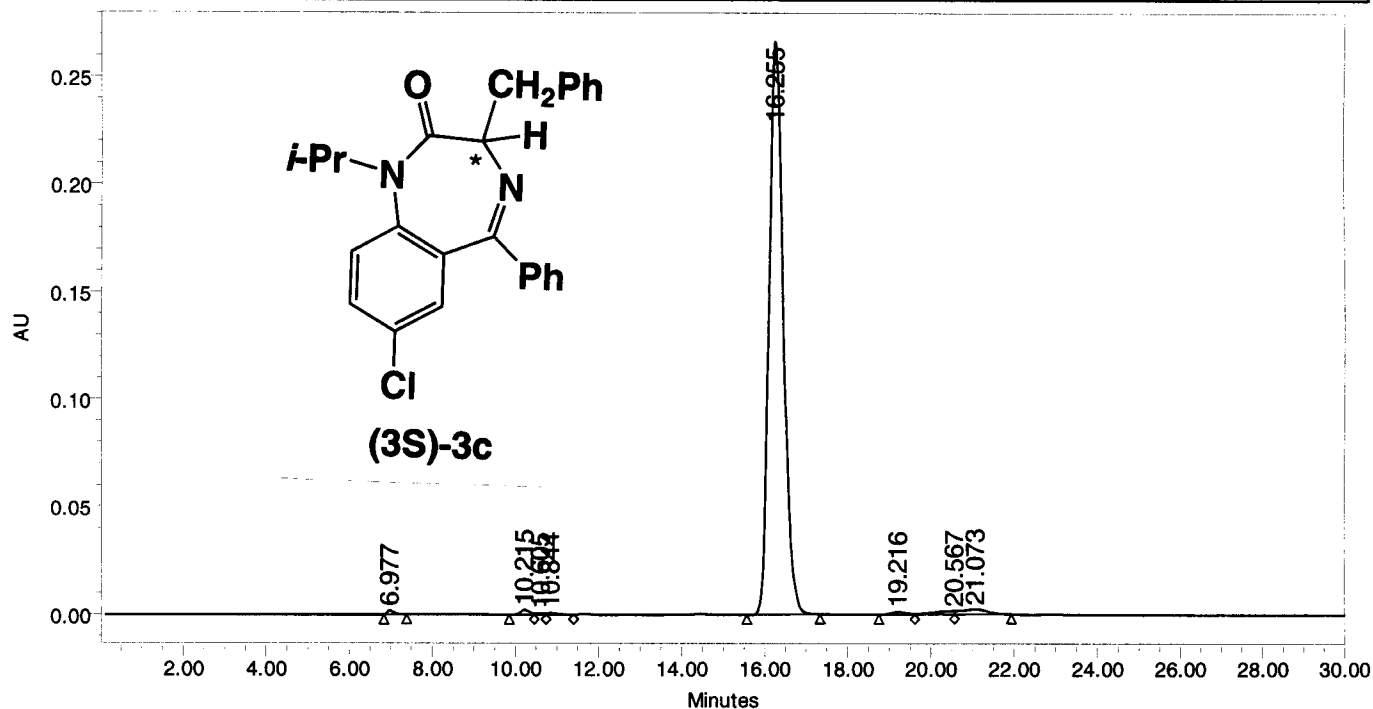

|   | RT<br>(min) | Area<br>( $\mu\text{V}\cdot\text{sec}$ ) | % Area | Height<br>( $\mu\text{V}$ ) | %<br>Height |
|---|-------------|------------------------------------------|--------|-----------------------------|-------------|
| 1 | 6.977       | 20358                                    | 0.31   | 1870                        | 0.67        |
| 2 | 10.215      | 33601                                    | 0.51   | 2252                        | 0.81        |
| 3 | 10.605      | 13001                                    | 0.20   | 823                         | 0.30        |
| 4 | 10.844      | 15064                                    | 0.23   | 843                         | 0.30        |
| 5 | 16.255      | 6325619                                  | 95.80  | 266783                      | 96.02       |
| 6 | 19.216      | 29933                                    | 0.45   | 1234                        | 0.44        |
| 7 | 20.567      | 57192                                    | 0.87   | 1643                        | 0.59        |
| 8 | 21.073      | 108410                                   | 1.64   | 2400                        | 0.86        |

: parts per Million : 1H

(Millions)

0 10.0 20.0 30.0 40.0 50.0 60.0 70.0 80.0 90.0 100.0 110.0 120.0 130.0 140.0 150.0 160.0 170.0

7.5726  
7.5584  
7.4667  
7.4525  
7.4232  
7.4081  
7.2560

6.8575  
6.8456

0.81909

13.30742

6.0

5.0

4.0

3.7220  
3.6949  
3.4861  
3.4641  
3.2996  
3.2731

0.48449

3

0.52466

3.0

2.5676  
2.5250

0.86042

2.0

2.0436

1.7463

1.5754

1.16389

1.0

0.8819  
0.7862

1.48563

0.0051  
-0.0017  
-0.0081

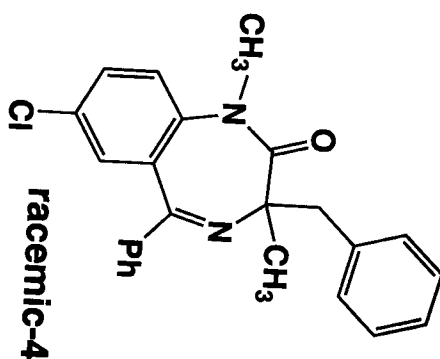

S 30

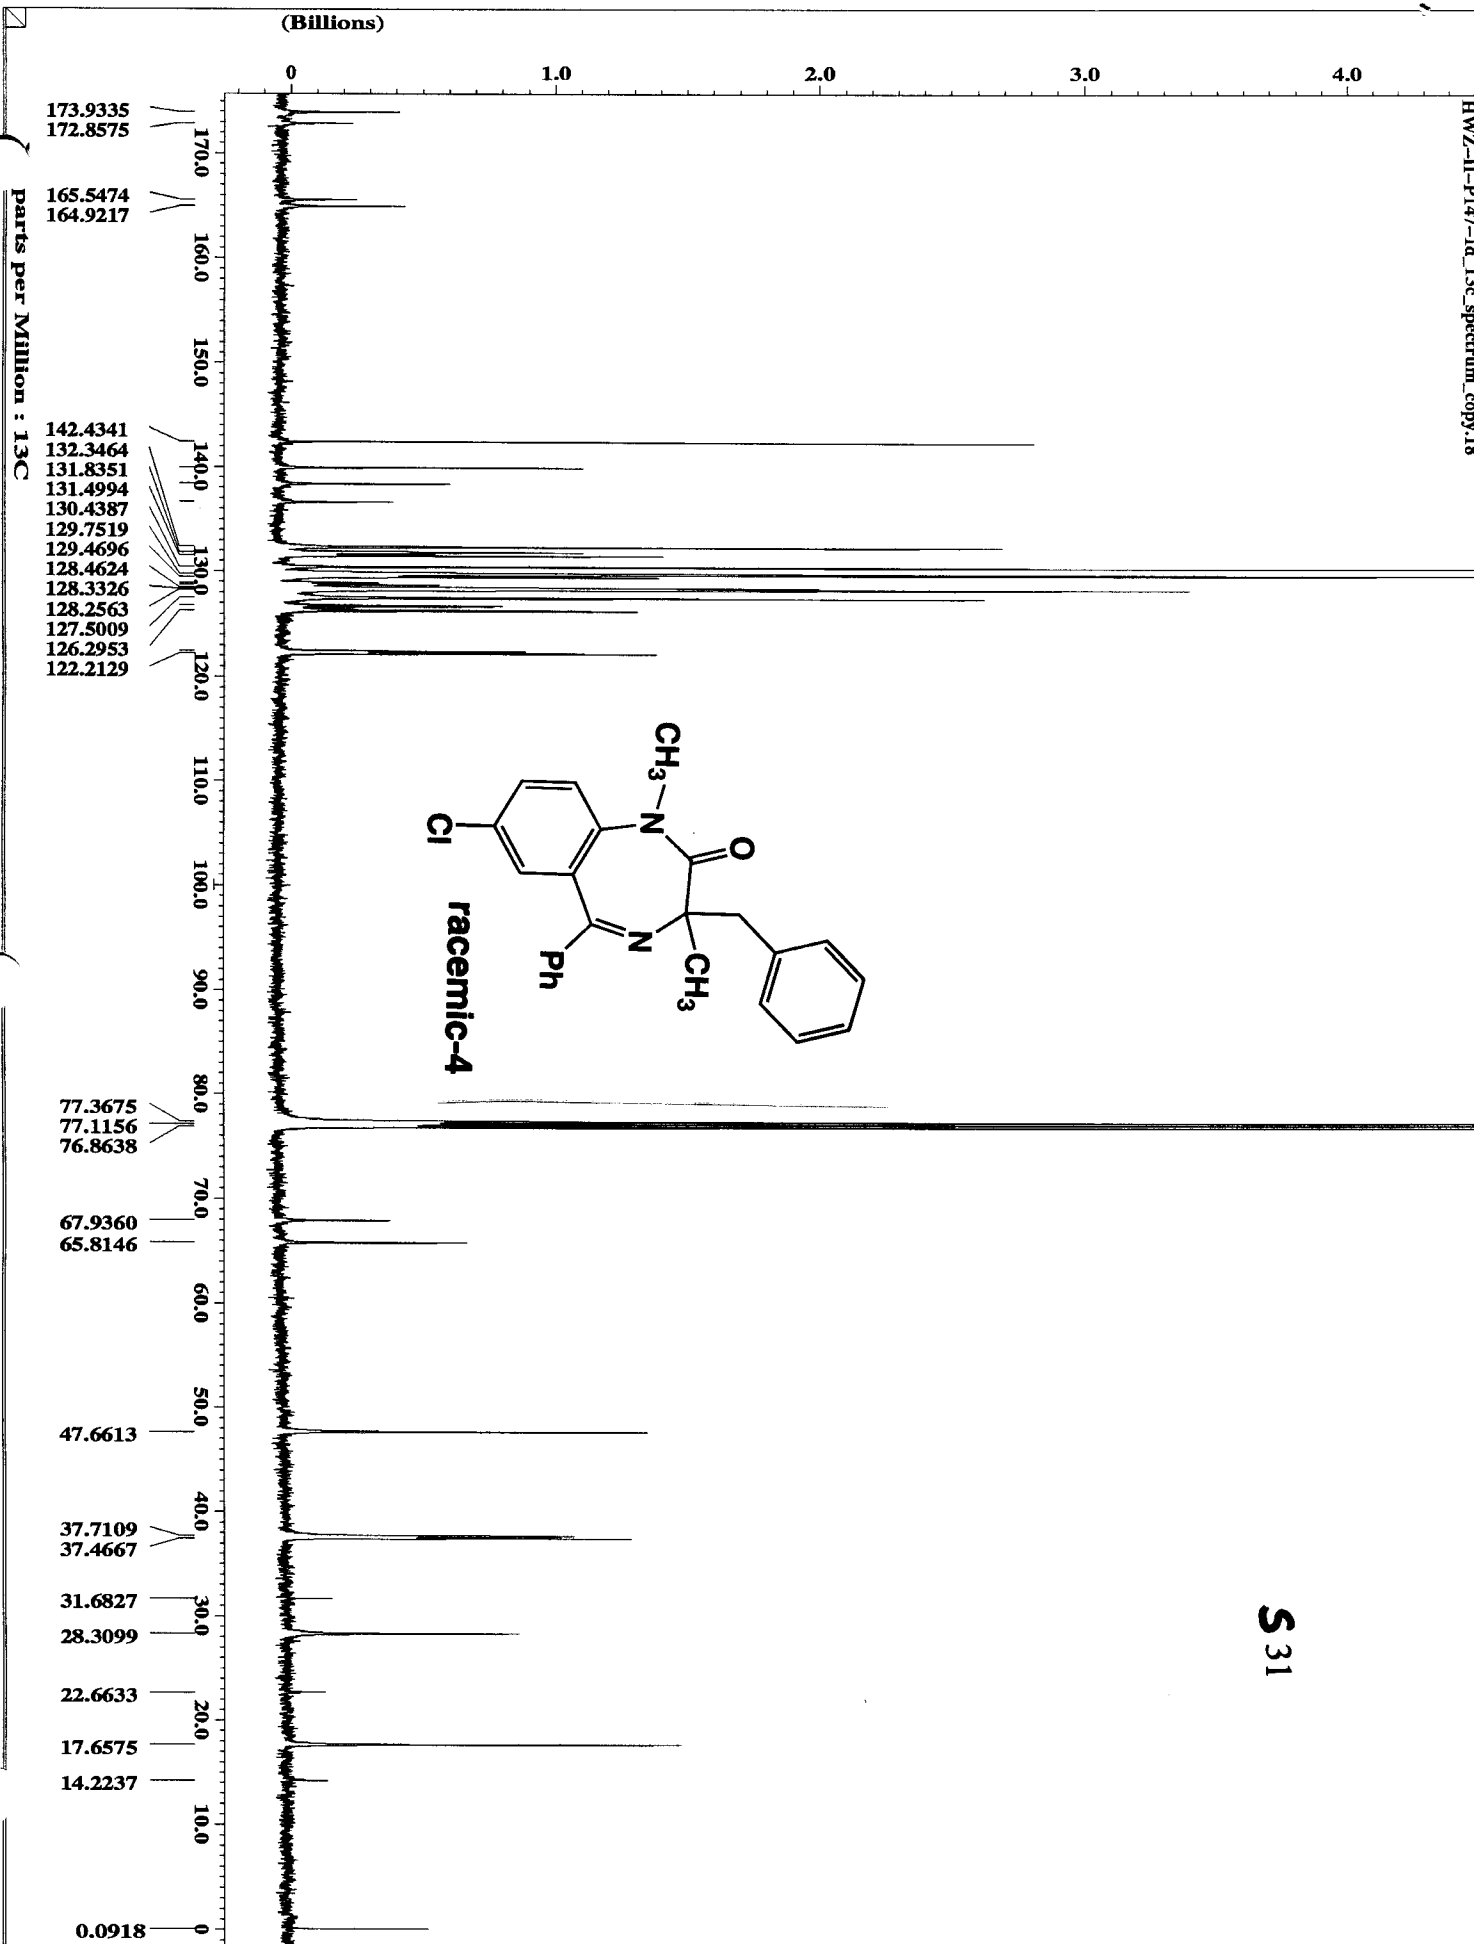

Project Name: HONGWU  
Reported by User: JOE

S32

Breeze

## SAMPLE INFORMATION

Sample Name: HWZ-II-P147-AD-H  
Sample Type: Unknown  
Vial: 1  
Injection #: 1  
Injection Volume: 10.00 ul  
Run Time: 40.00 Minutes

Acquired By: HongWu  
Date Acquired: 5/2/03 2:25:30 PM  
Acq. Method: 2%B  
Date Processed: 6/6/03 5:45:34 PM  
Channel Name: 2487Channel 1  
Sample Set Name: Hongw u

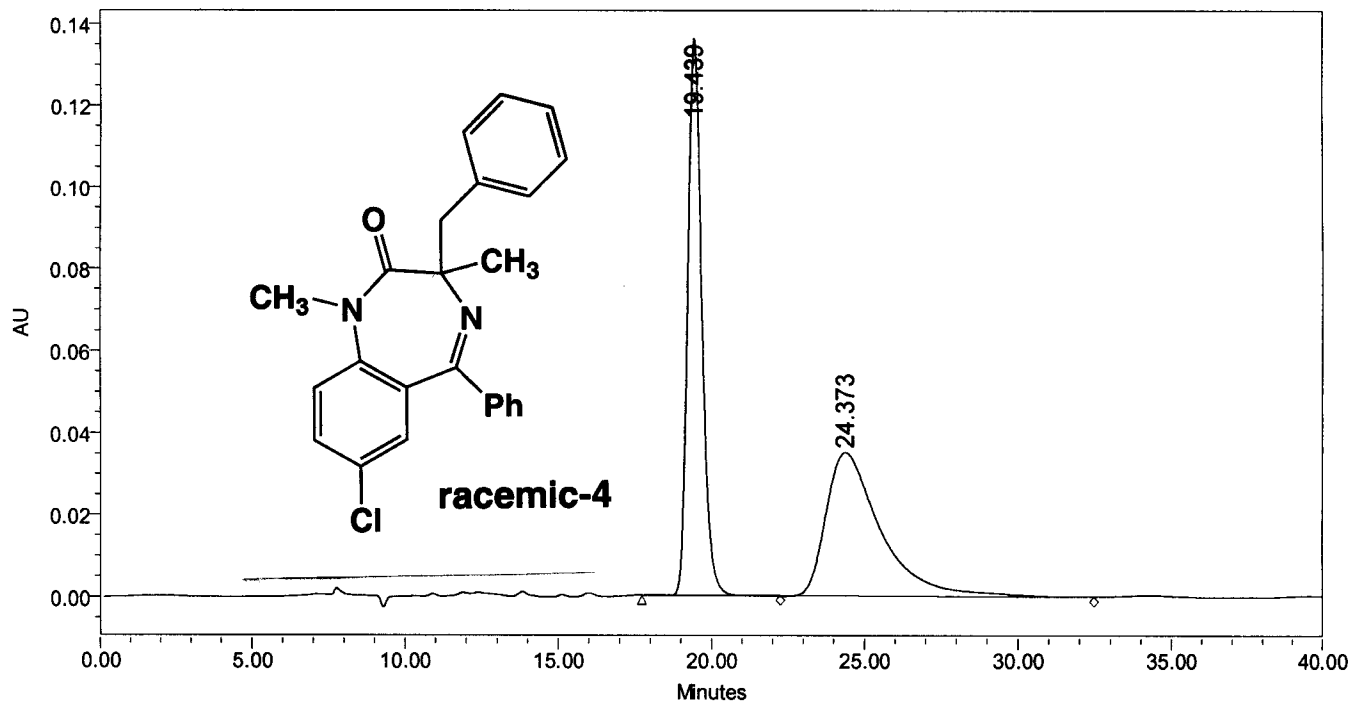

|   | RT<br>(min) | Area<br>( $\mu V \cdot sec$ ) | % Area | Height<br>( $\mu V$ ) | %<br>Height |
|---|-------------|-------------------------------|--------|-----------------------|-------------|
| 1 | 19.439      | 4373175                       | 50.23  | 135999                | 79.50       |
| 2 | 24.373      | 4332324                       | 49.77  | 35069                 | 20.50       |



Project Name: HONGWU  
Reported by User: HongWu

S33

Breeze

## SAMPLE INFORMATION

Sample Name: HWZ-IV-P18-AD-H  
Sample Type: Unknown  
Vial: 1  
Injection #: 1  
Injection Volume: 10.00 ul  
Run Time: 35.00 Minutes

Acquired By: HongWu  
Date Acquired: 5/2/03 5:46:07 PM  
Acq. Method: 2%B  
Date Processed: 5/2/03 6:32:28 PM  
Channel Name: 2487Channel 1  
Sample Set Name: Hongwu

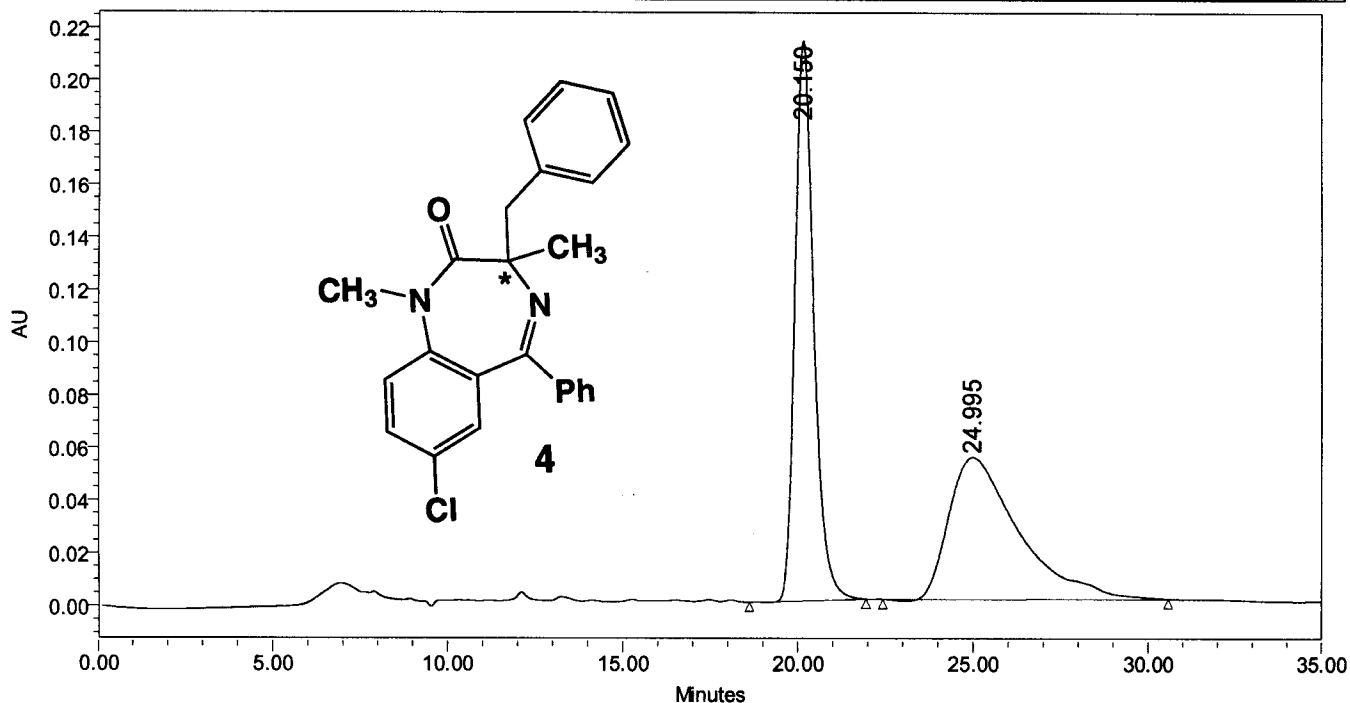

|   | RT<br>(min) | Area<br>( $\mu\text{V}\cdot\text{sec}$ ) | % Area | Height<br>( $\mu\text{V}$ ) | %<br>Height |
|---|-------------|------------------------------------------|--------|-----------------------------|-------------|
| 1 | 20.150      | 7971859                                  | 51.69  | 213123                      | 79.83       |
| 2 | 24.995      | 7450687                                  | 48.31  | 53841                       | 20.17       |

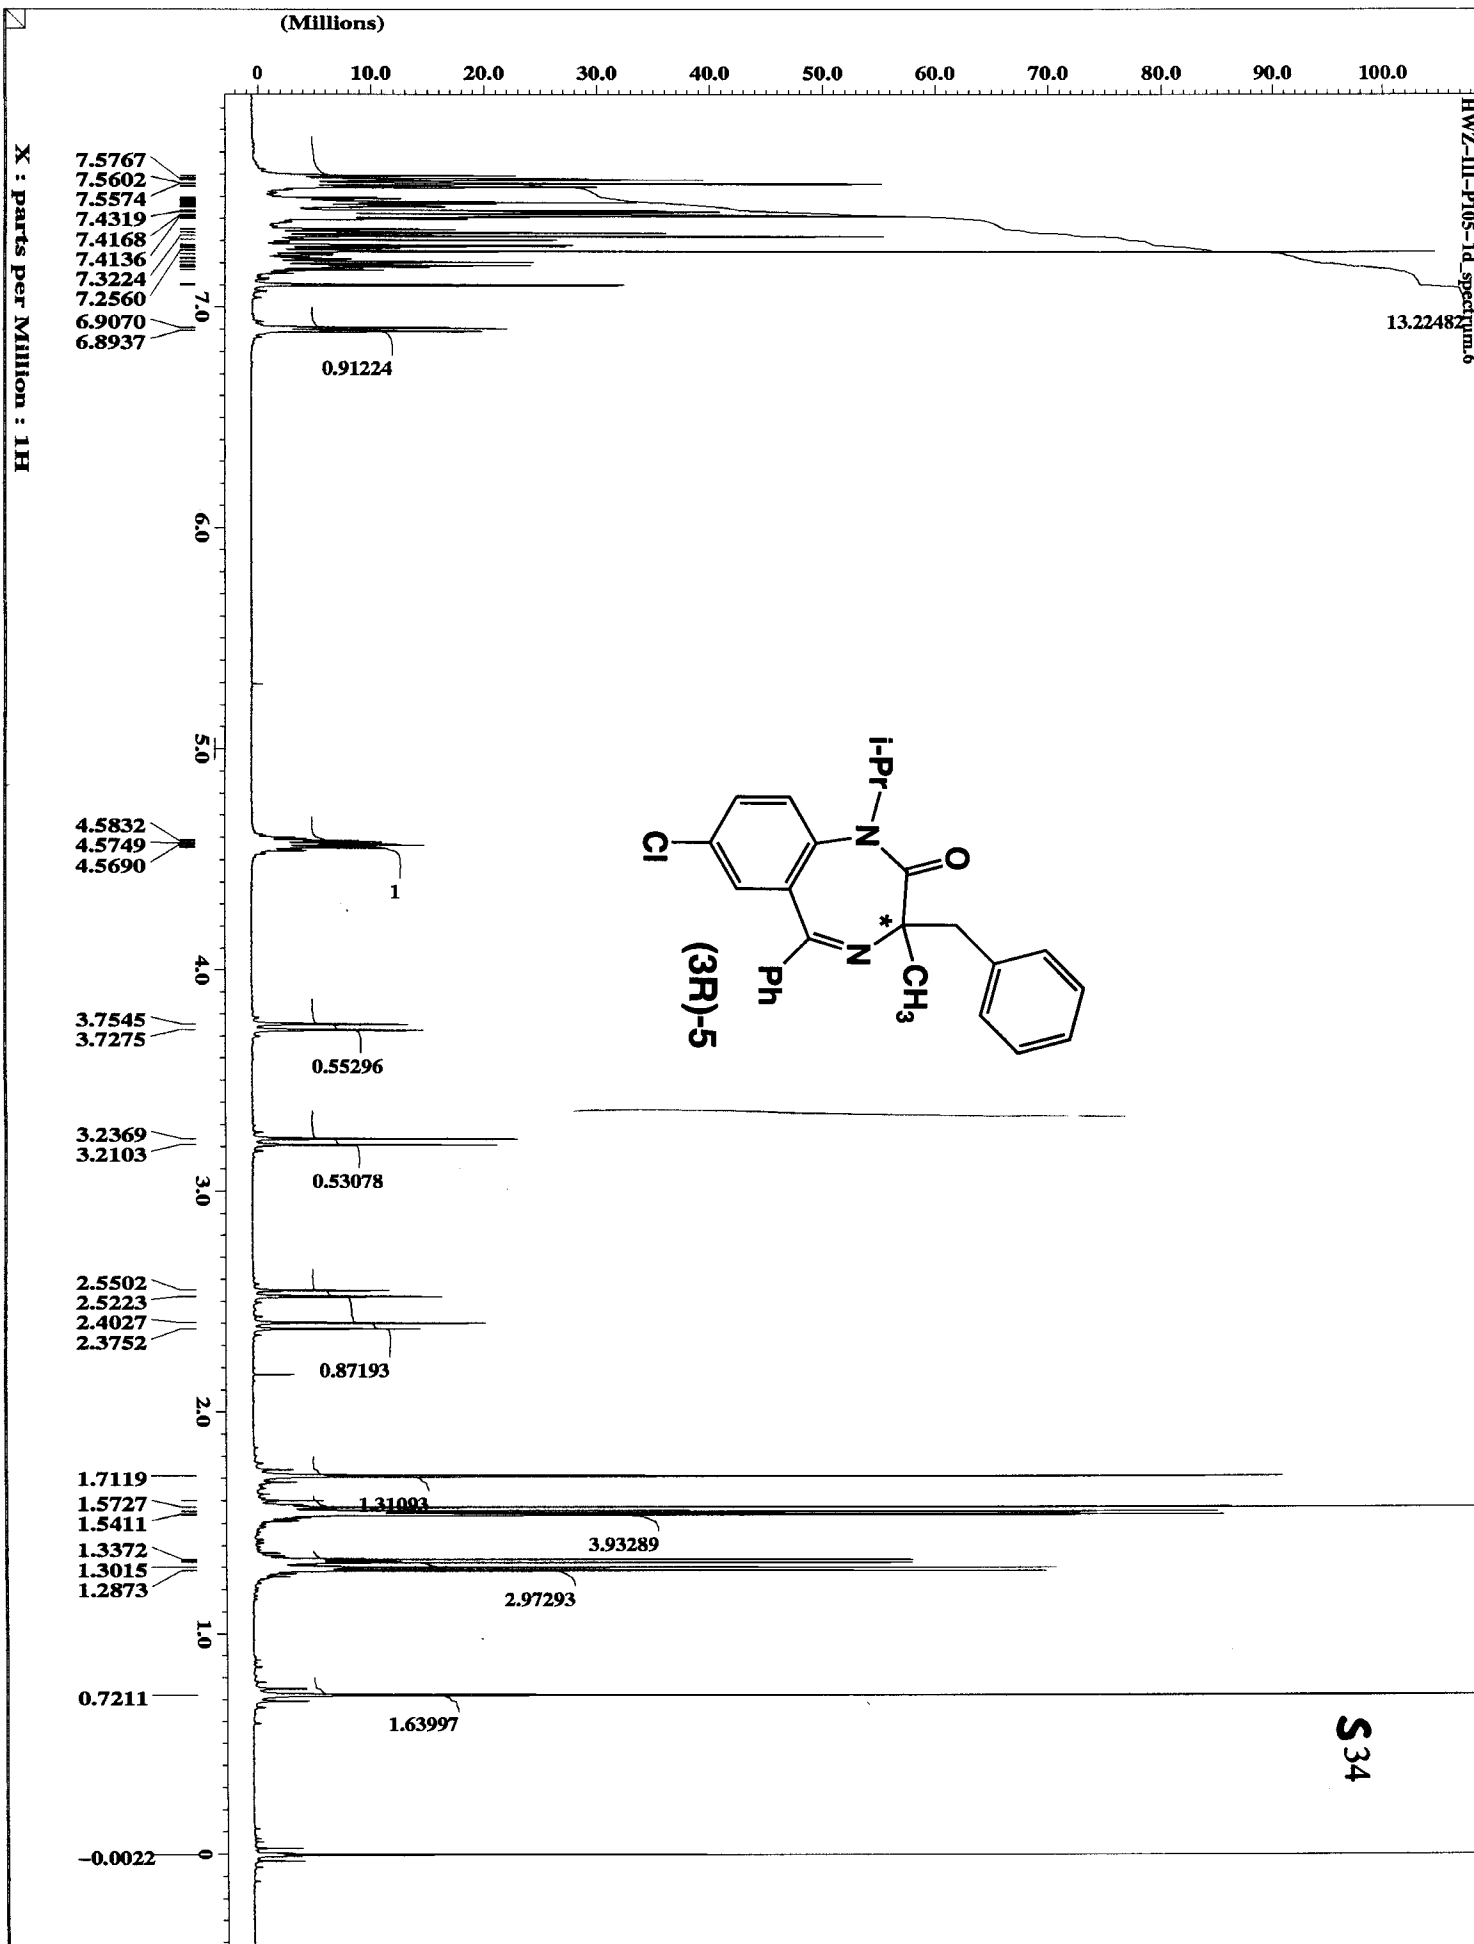

1ch-xi-115-2

pad=2.5 run with findz0 before acquisition

Archive directory: /export/home/robot/vnmr/sys/data  
Sample directory: 1ch-xi-115-2\_1oc3\_2003-06-04

Pulse Sequence: gcosy

Solvent: CDCl3  
Ambient temperature  
File: gcosy\_01  
INDVA-400 "inovaa400"

Relax. delay 1.000 sec  
Acq. time 0.150 sec  
Width 4174.9 Hz  
2D Width 4174.9 Hz  
2 repetitions  
128 increments  
OBSERVE H1 399.9418409 MHz  
DATA PROCESSING  
Sg. sine bell 0.075 sec  
F1 DATA PROCESSING  
Sg. sine bell 0.031 sec  
F1 size 2048 x 2048  
Total time 5 min, 20 sec  
Jun 4 2003  
VA Tech Chemistry NMR Lab

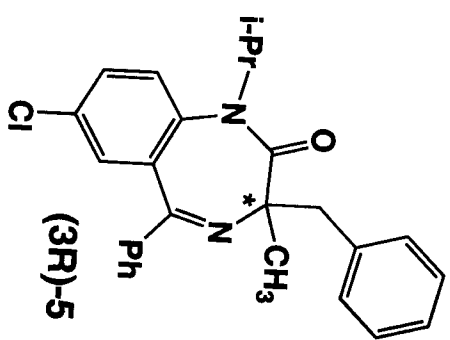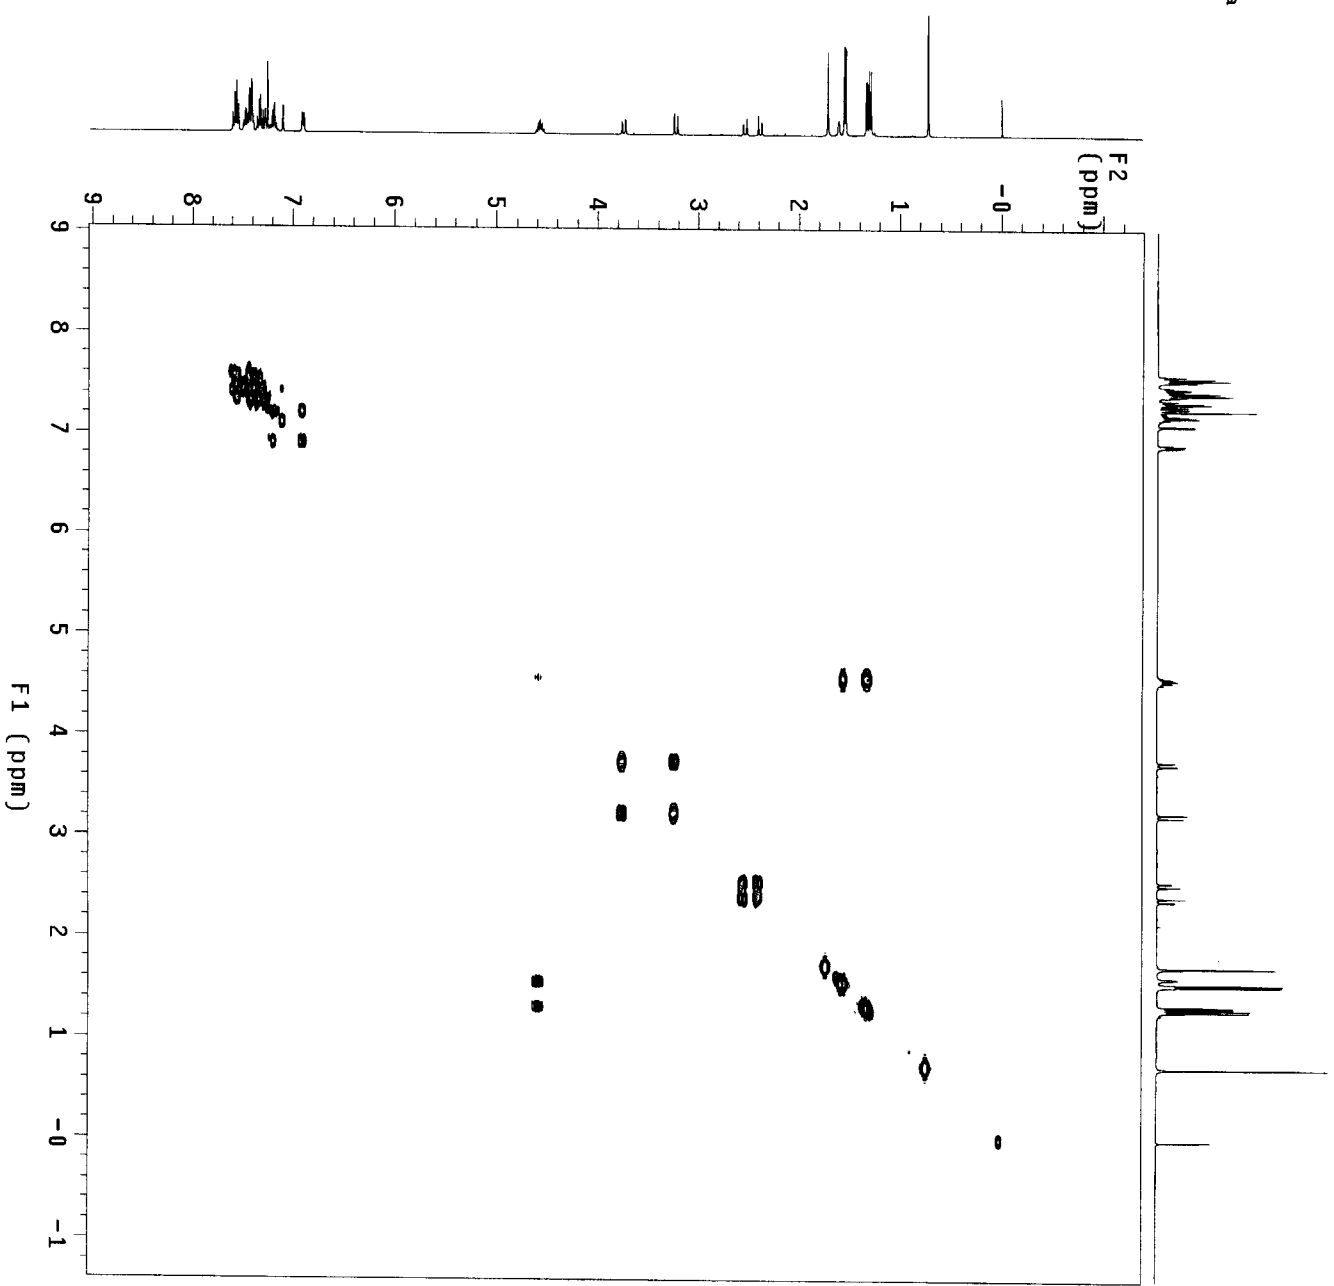

1ch-xi-115-2

pad=2.5 run with findz0 before acquisition

Archive directory: /export/home/robot/vnmrSYS/data  
 Sample directory: 1ch-xi-115-2\_1oc3\_2003-06-04

Pulse Sequence: gCOSY

Solvent: CDCl<sub>3</sub>

Ambient temperature

File: gCOSY\_01

INOVA-400 "inova400"

Relax. delay 1.000 sec  
 Acq. time 0.150 sec  
 Width 4174.9 Hz  
 2D Width 4174.9 Hz  
 2 repetitions  
 128 increments  
 OBSERVE H1, 399.9418409 MHz  
 DATA PROCESSING  
 S4. sine bell 0.075 sec  
 F1 DATA PROCESSING  
 S4. sine bell 0.031 sec  
 F1 size 2048 x 2048  
 Total time 5 min, 20 sec  
 Jun 4 2003  
 VA Tech Chemistry NMR Lab

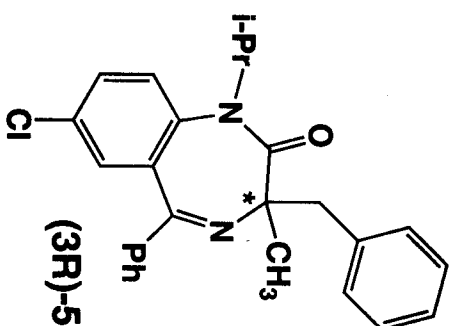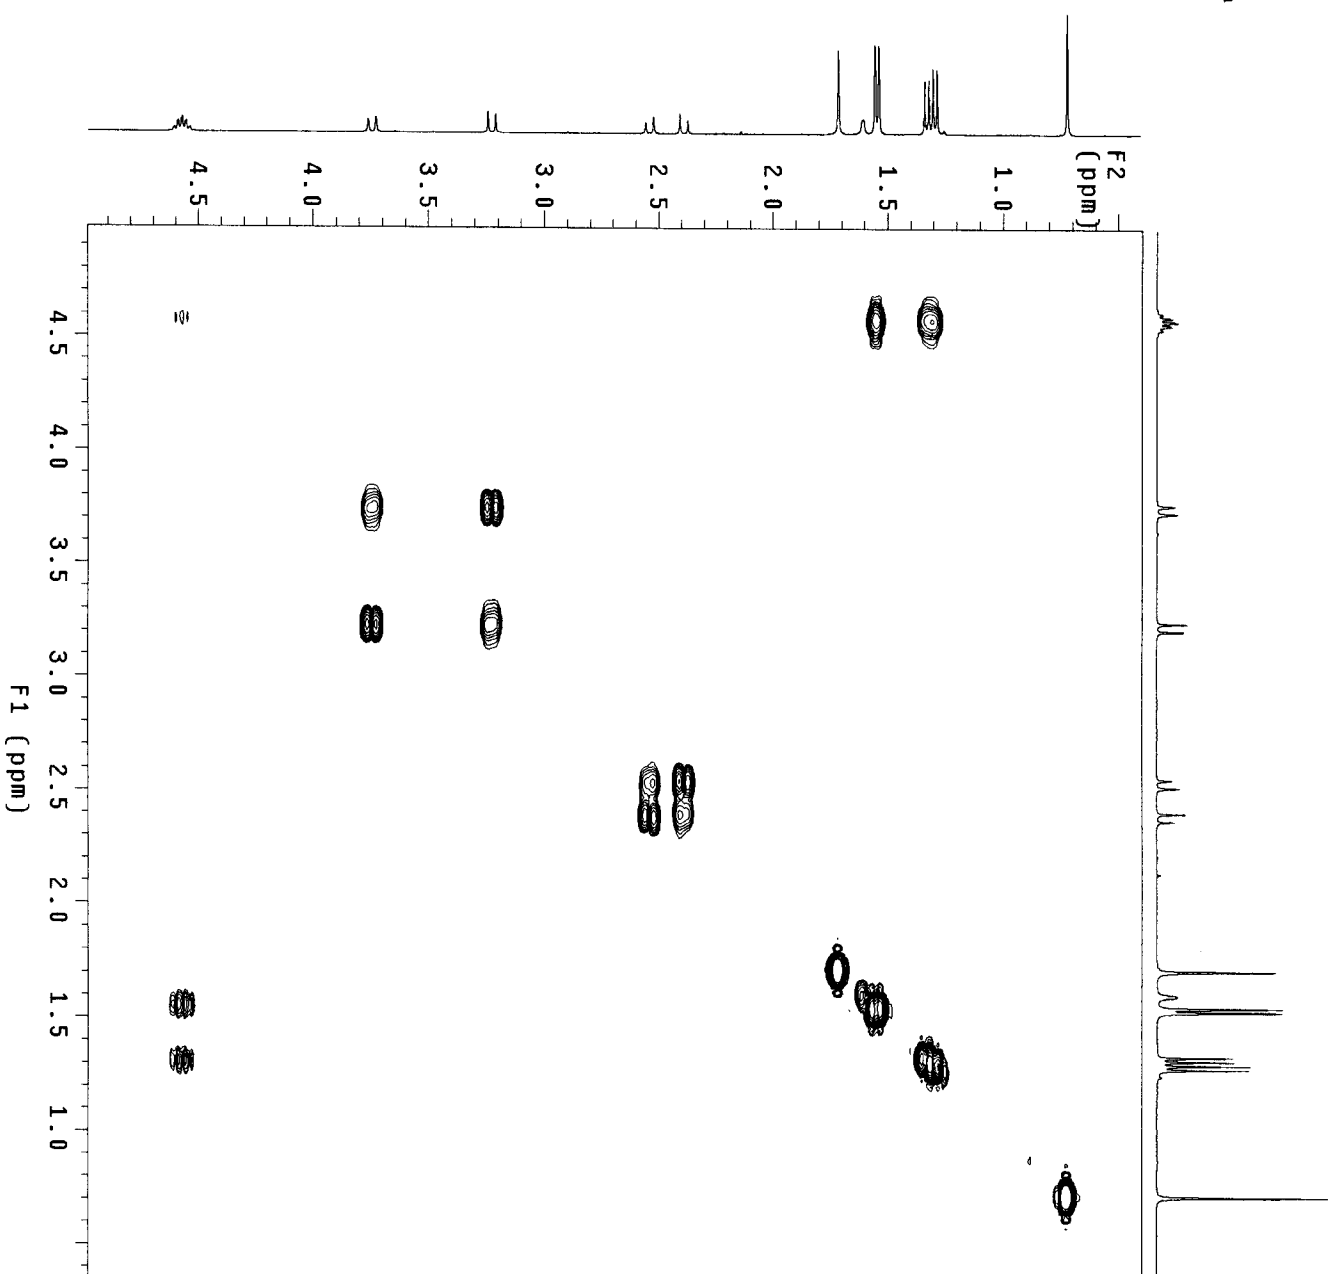

1ch-xi-115-2

Archive directory: /export/home/robot/vnmrsws/data  
 Sample directory: 1ch-xi-115-2\_joc3\_2003-06-04-180044

Pulse Sequence: NOESY

Solvent: CDCl<sub>3</sub>

Ambient temperature

File: NOESY\_01

INOVA-400 "inova400"

Relax. delay 2.000 sec  
 Mixing 1.000 sec  
 Acq. time 0.150 sec  
 Width 4174.9 Hz  
 2D Width 4174.9 Hz  
 4 repetitions  
 2 x 128 increments  
 OBSERVE H1 399.9418406 MHz  
 DATA PROCESSING  
 Gauss apodization 0.069 sec  
 F1 DATA PROCESSING  
 Gauss apodization 0.028 sec  
 FI size 2048 x 2048  
 Total time 55 min, 56 sec  
 Jun 4 2003  
 VA Tech Chemistry NMR Lab

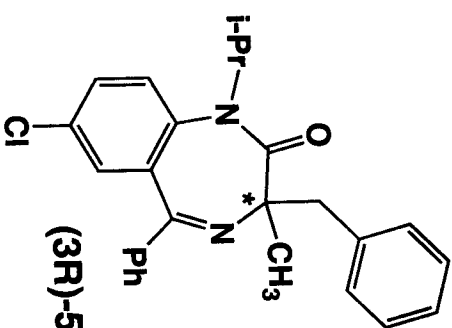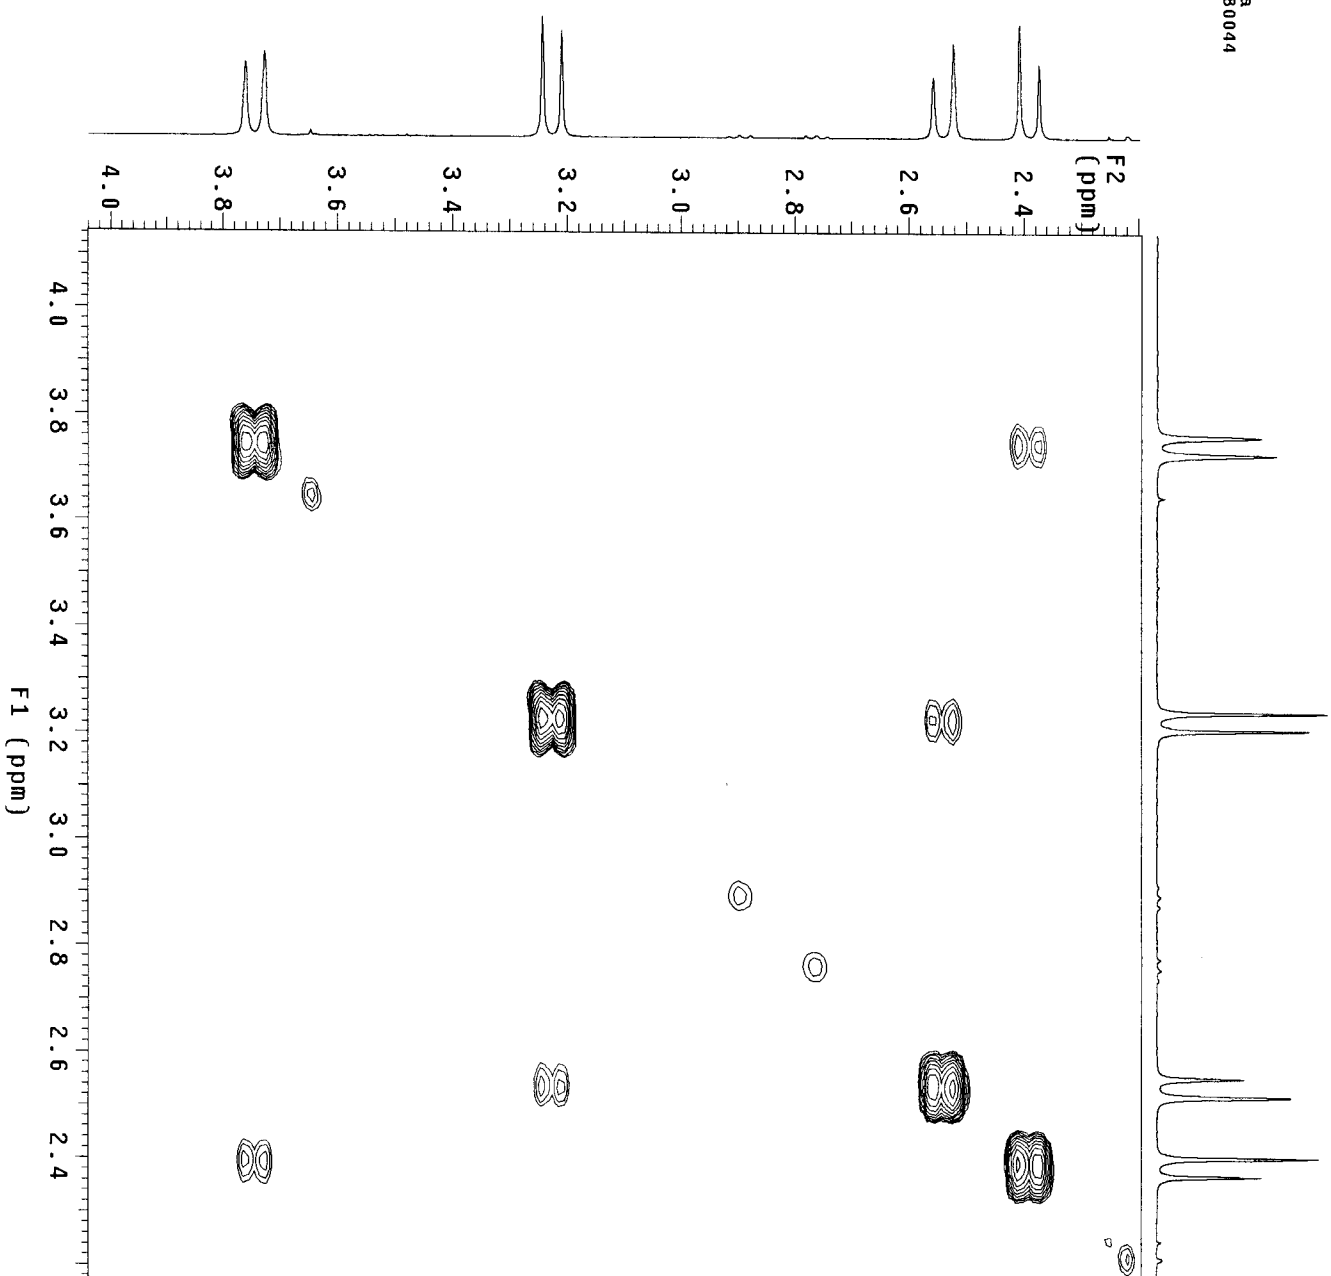

1ch-x11-115-2

Archive directory: /export/home/robot/vnmr/sys/data  
 Sample directory: 1ch-x11-115-2\_1oc3\_2003-06-04-180044

Pulse Sequence: NOESY

Solvent: CDCl<sub>3</sub>

Ambient temperature

File: NOESY 01

INOVA-400 "inova400"

Relax. delay 2.000 sec  
 Mixing 1.000 sec  
 Acq. time 0.150 sec  
 Width 4174.9 Hz  
 2D Width 4174.9 Hz  
 4 repetitions  
 2 x 128 increments  
 OBSERVE H1, 399.9418406 MHz  
 DATA PROCESSING  
 Gauss apodization 0.069 sec  
 F1 DATA PROCESSING  
 Gauss apodization 0.028 sec  
 F1 size 2048 x 2048  
 Total time 55 min, 56 sec  
 Jun 4 2003  
 VA Tech Chemistry NMR Lab

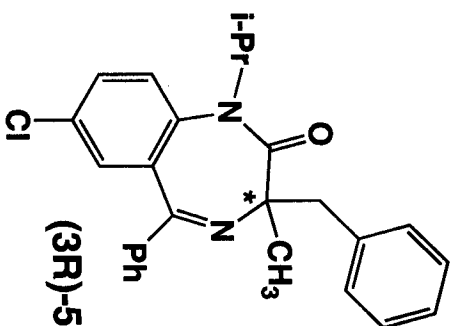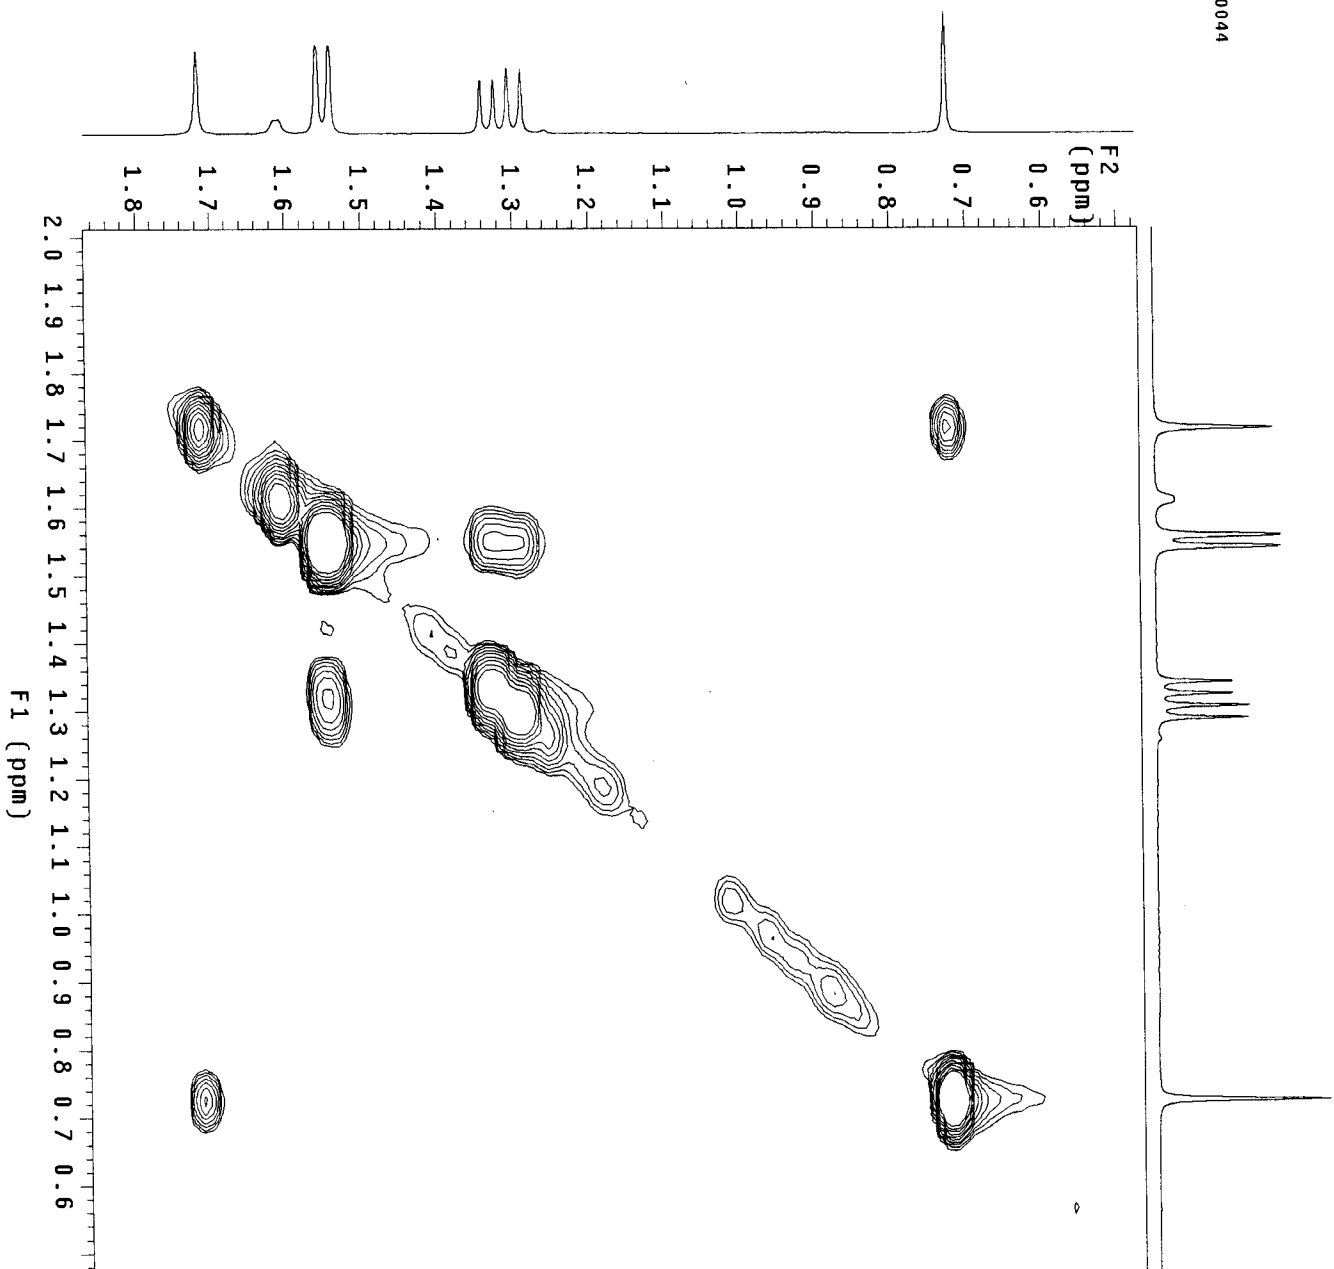

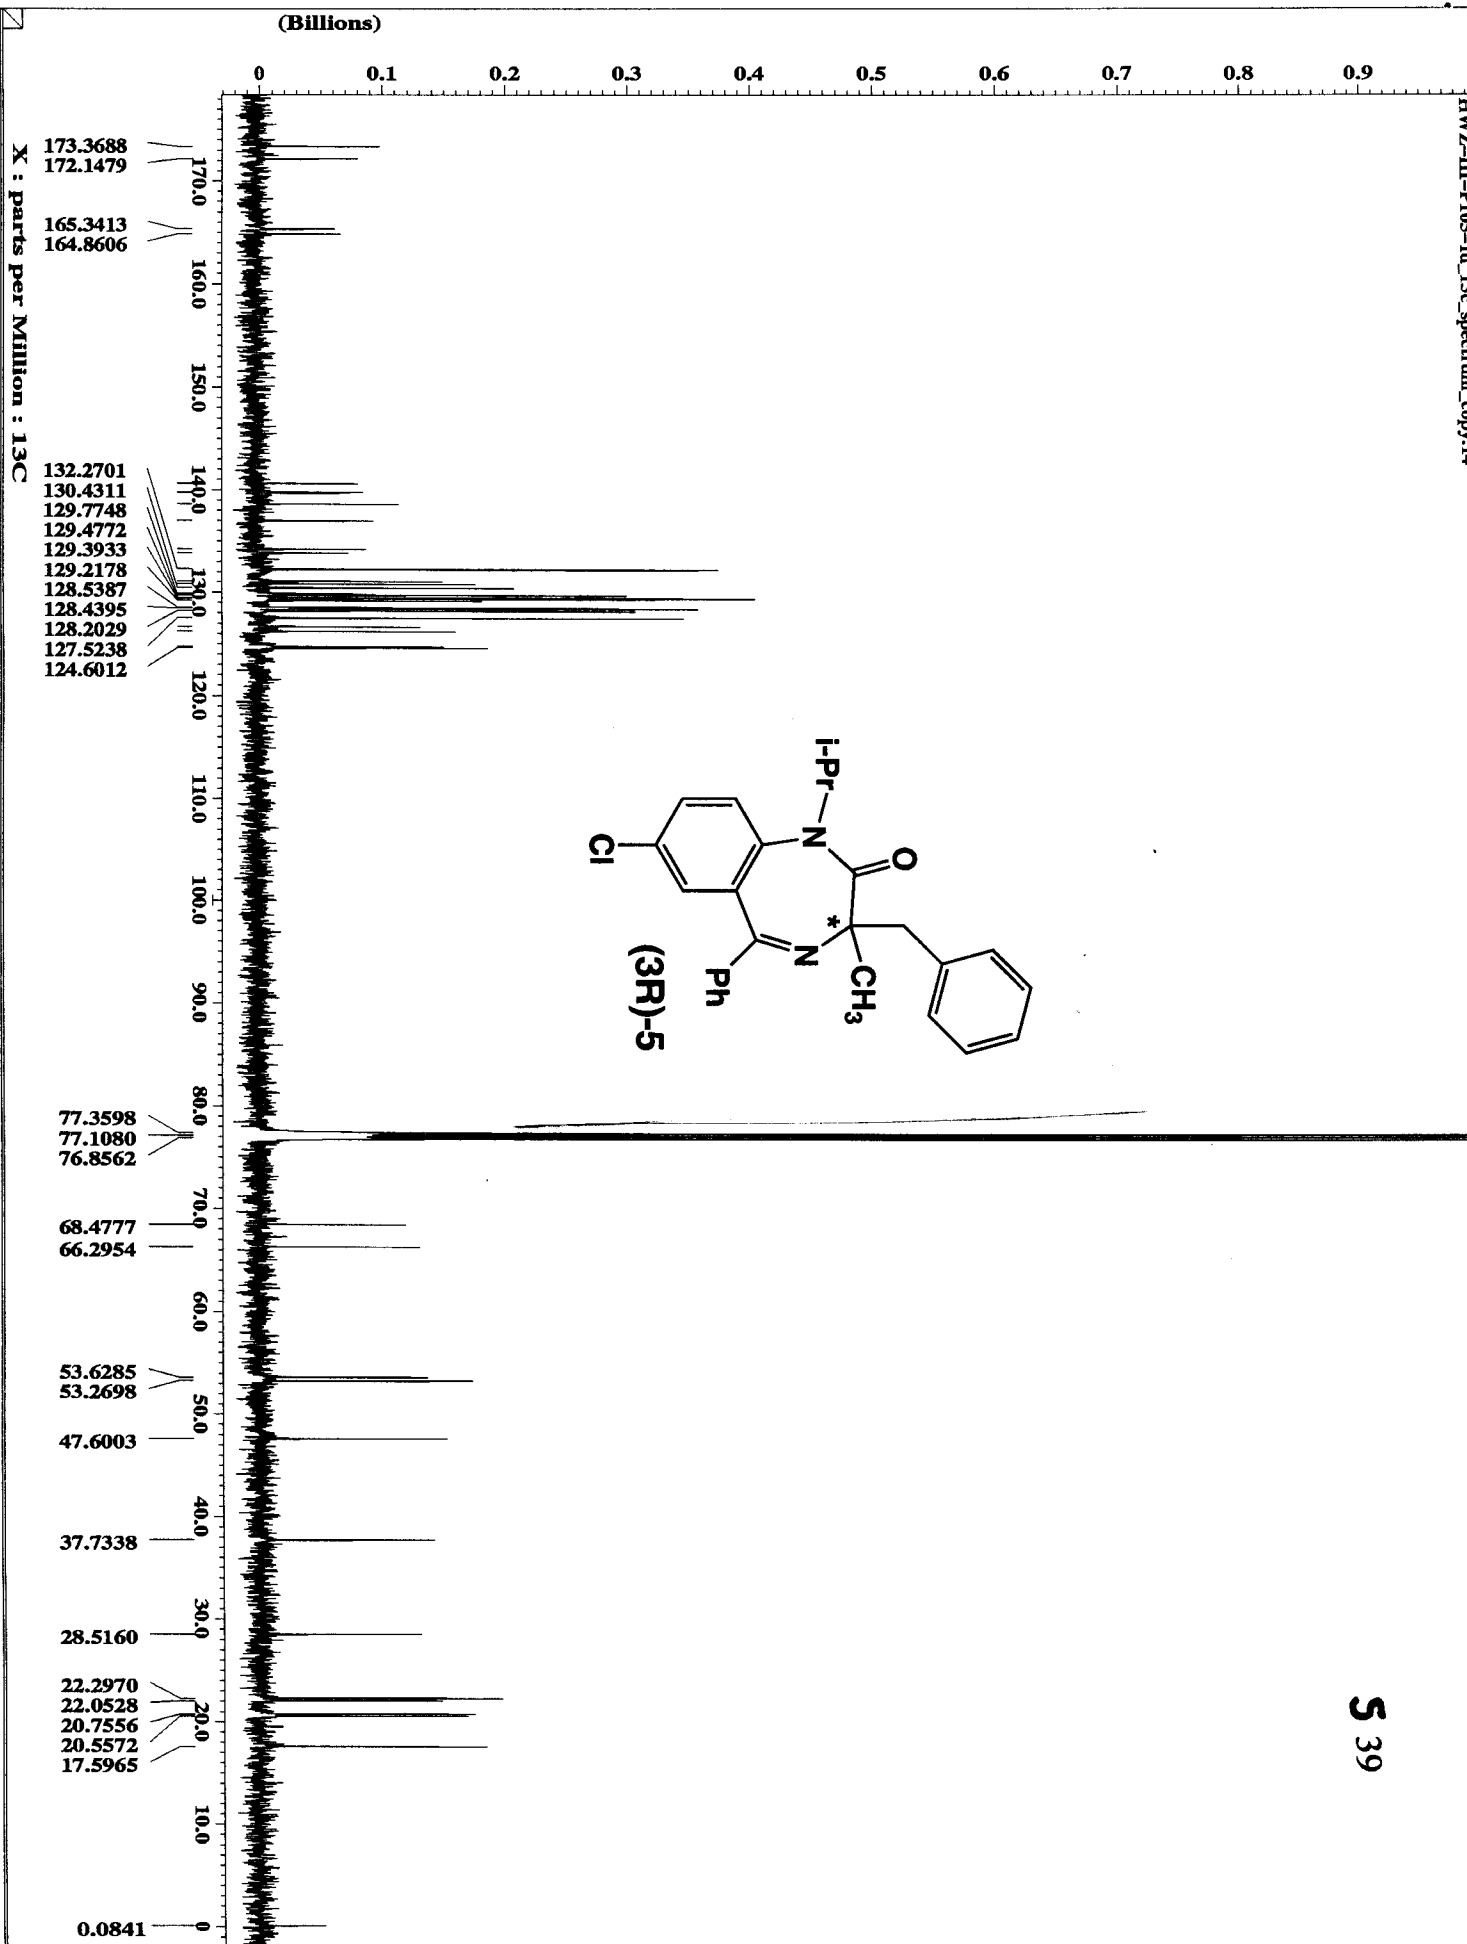

Project Name: Joe\_Chiral  
Reported by User: JOE

S40

Breeze

## SAMPLE INFORMATION

Sample Name: HWZ-III-53  
Sample Type: Unknown  
Vial: 1  
Injection #: 1  
Injection Volume: 10.00  $\mu$ l  
Run Time: 120.00 Minutes

Acquired By: JOE  
Date Acquired: 3/3/03 2:13:25 PM  
Acq. Method: 1% B  
Date Processed: 3/3/03 4:29:55 PM  
Channel Name: 2487Channel 1  
Sample Set Name: JOE

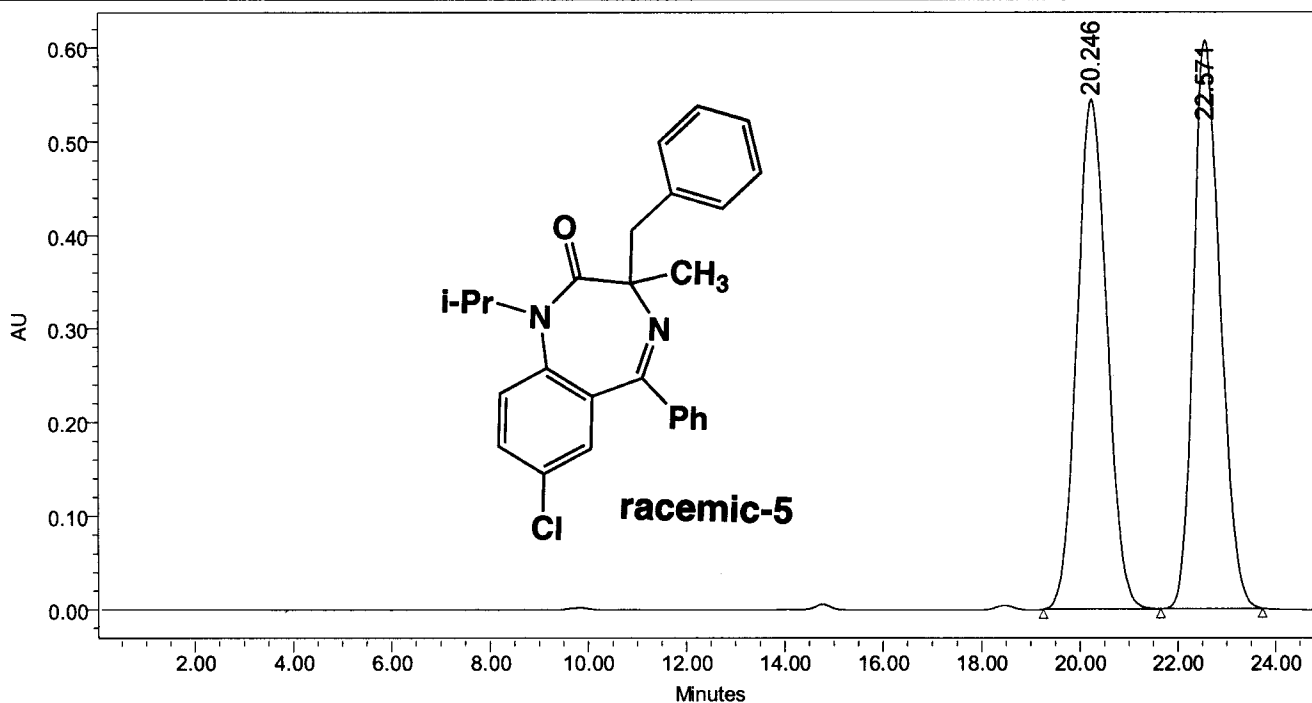

|   | RT<br>(min) | Area<br>( $\mu$ V*sec) | % Area | Height<br>( $\mu$ V) | %<br>Height |
|---|-------------|------------------------|--------|----------------------|-------------|
| 1 | 20.246      | 23102924               | 49.98  | 544191               | 47.29       |
| 2 | 22.571      | 23117471               | 50.02  | 606565               | 52.71       |



Project Name: Joe\_Chiral  
Reported by User: JOE

S41

Breeze

## SAMPLE INFORMATION

Sample Name: HWZ-III-P89  
Sample Type: Unknown  
Vial: 1  
Injection #: 1  
Injection Volume: 10.00 ul  
Run Time: 30.00 Minutes

Acquired By: JOE  
Date Acquired: 3/3/03 6:28:46 PM  
Acq. Method: 1% B  
Date Processed: 3/4/03 8:34:58 AM  
Channel Name: 2487Channel 1  
Sample Set Name: Hongwu

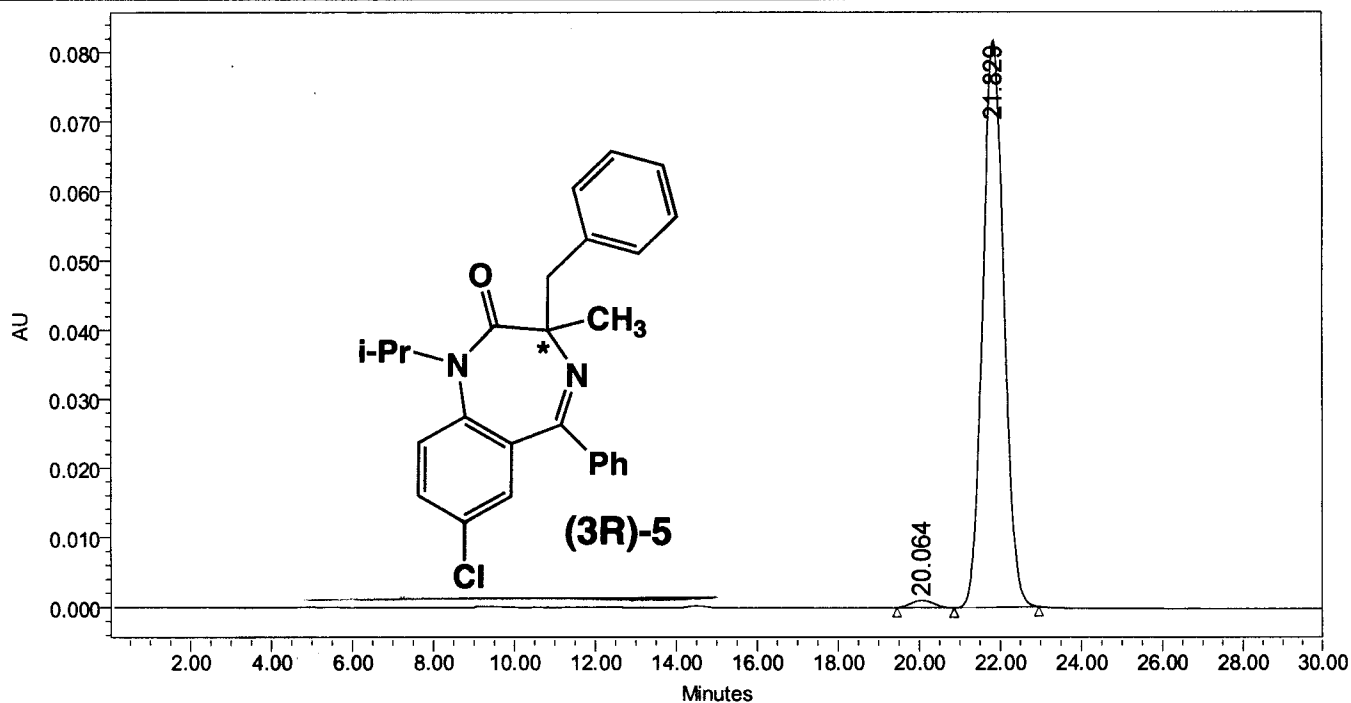

|   | RT<br>(min) | Area<br>( $\mu\text{V}\cdot\text{sec}$ ) | % Area | Height<br>( $\mu\text{V}$ ) | %<br>Height |
|---|-------------|------------------------------------------|--------|-----------------------------|-------------|
| 1 | 20.064      | 41119                                    | 1.37   | 1045                        | 1.26        |
| 2 | 21.829      | 2958167                                  | 98.63  | 81767                       | 98.74       |

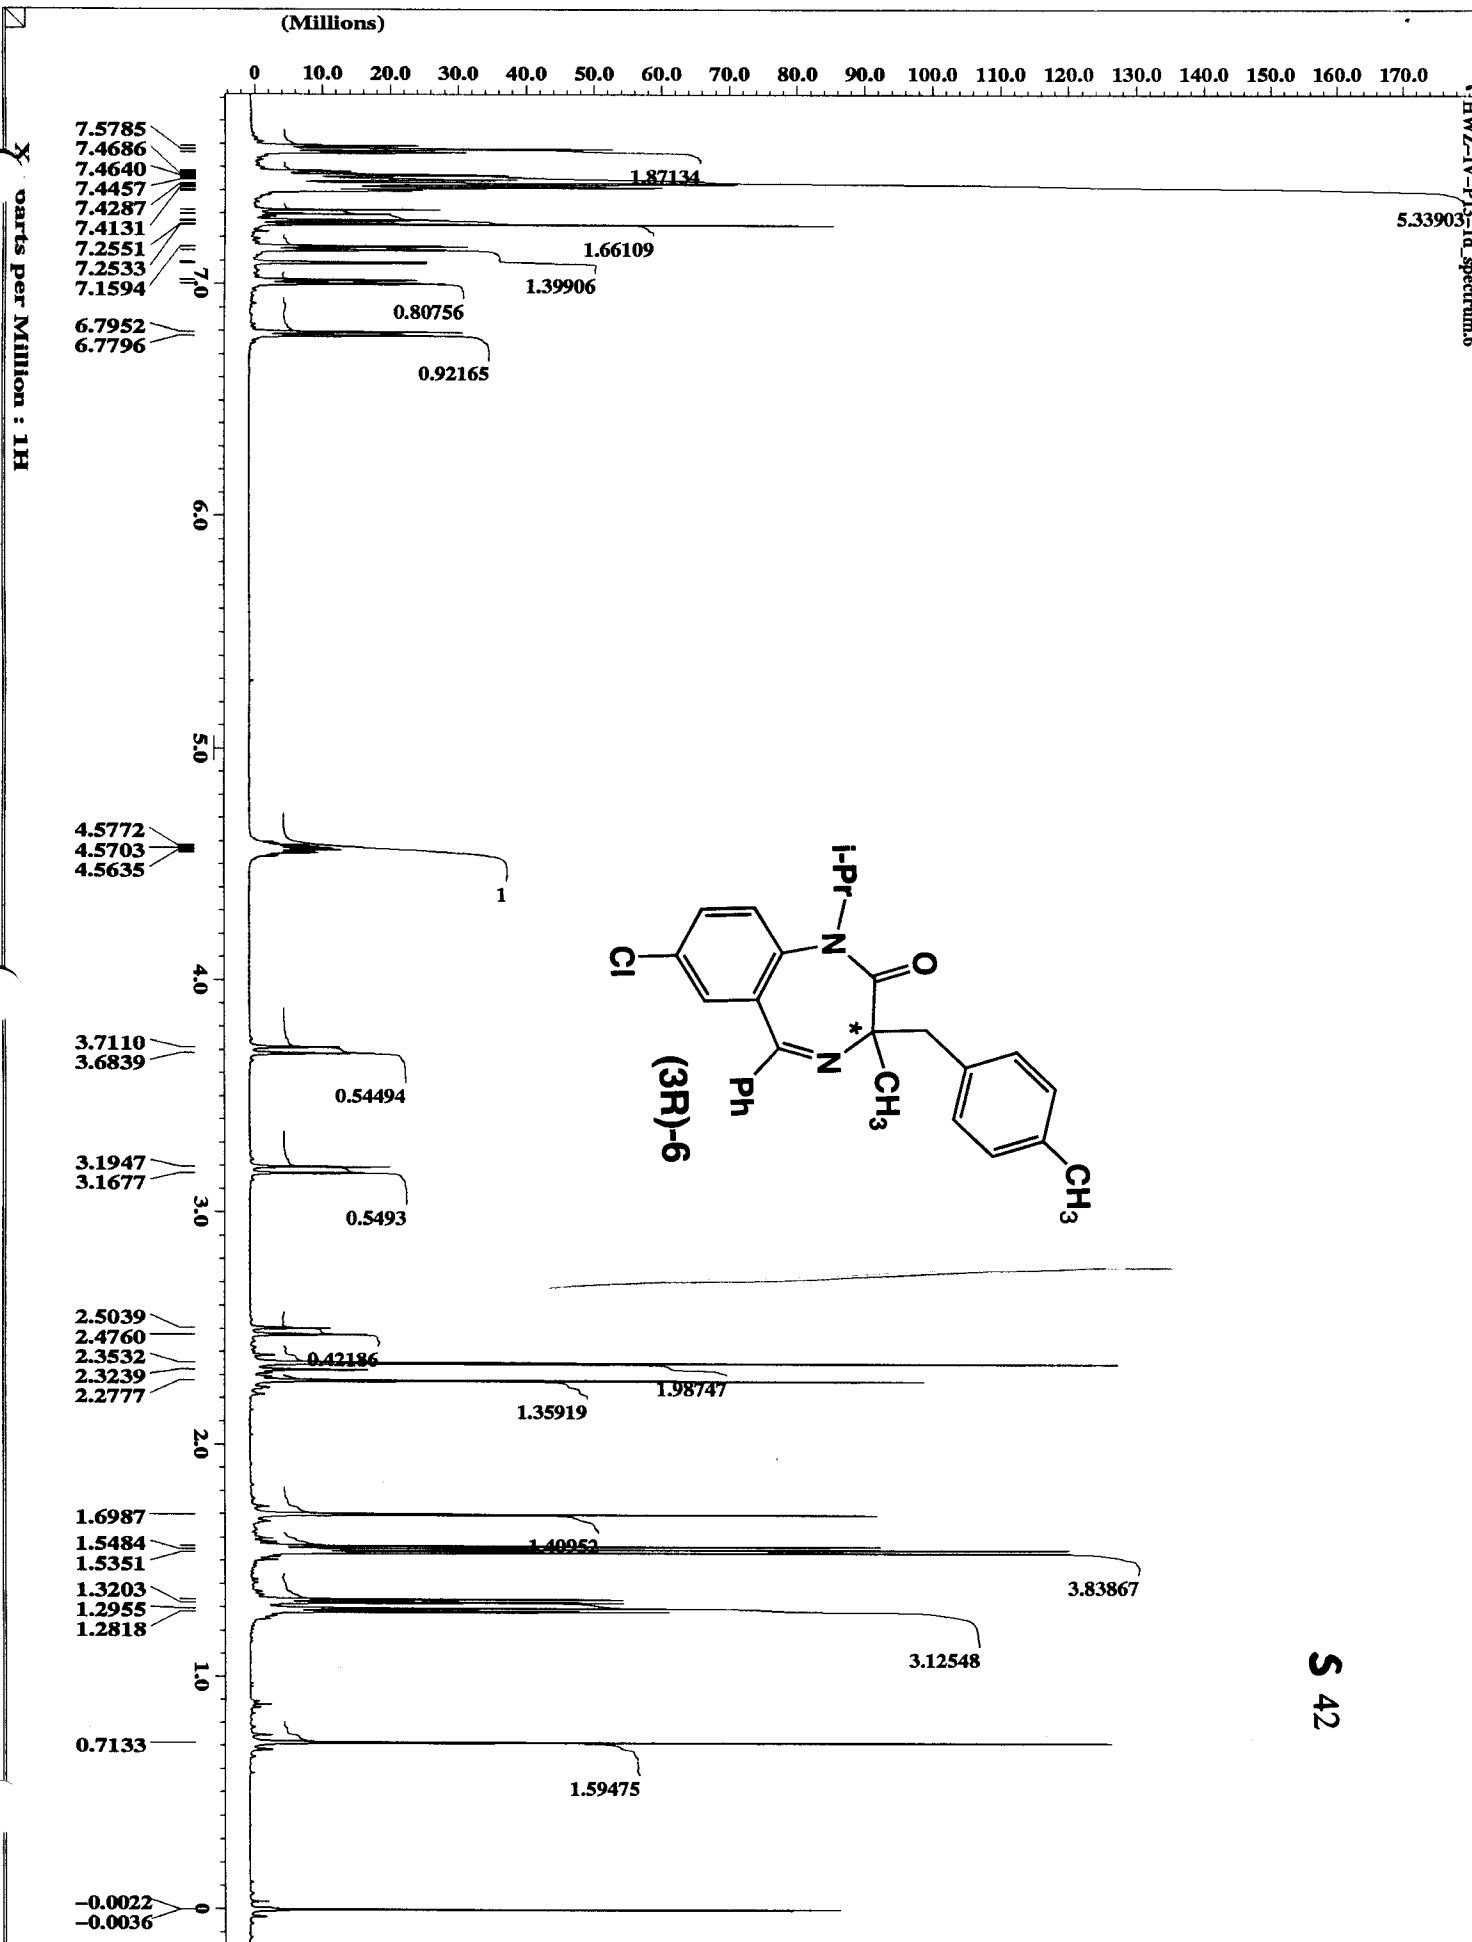

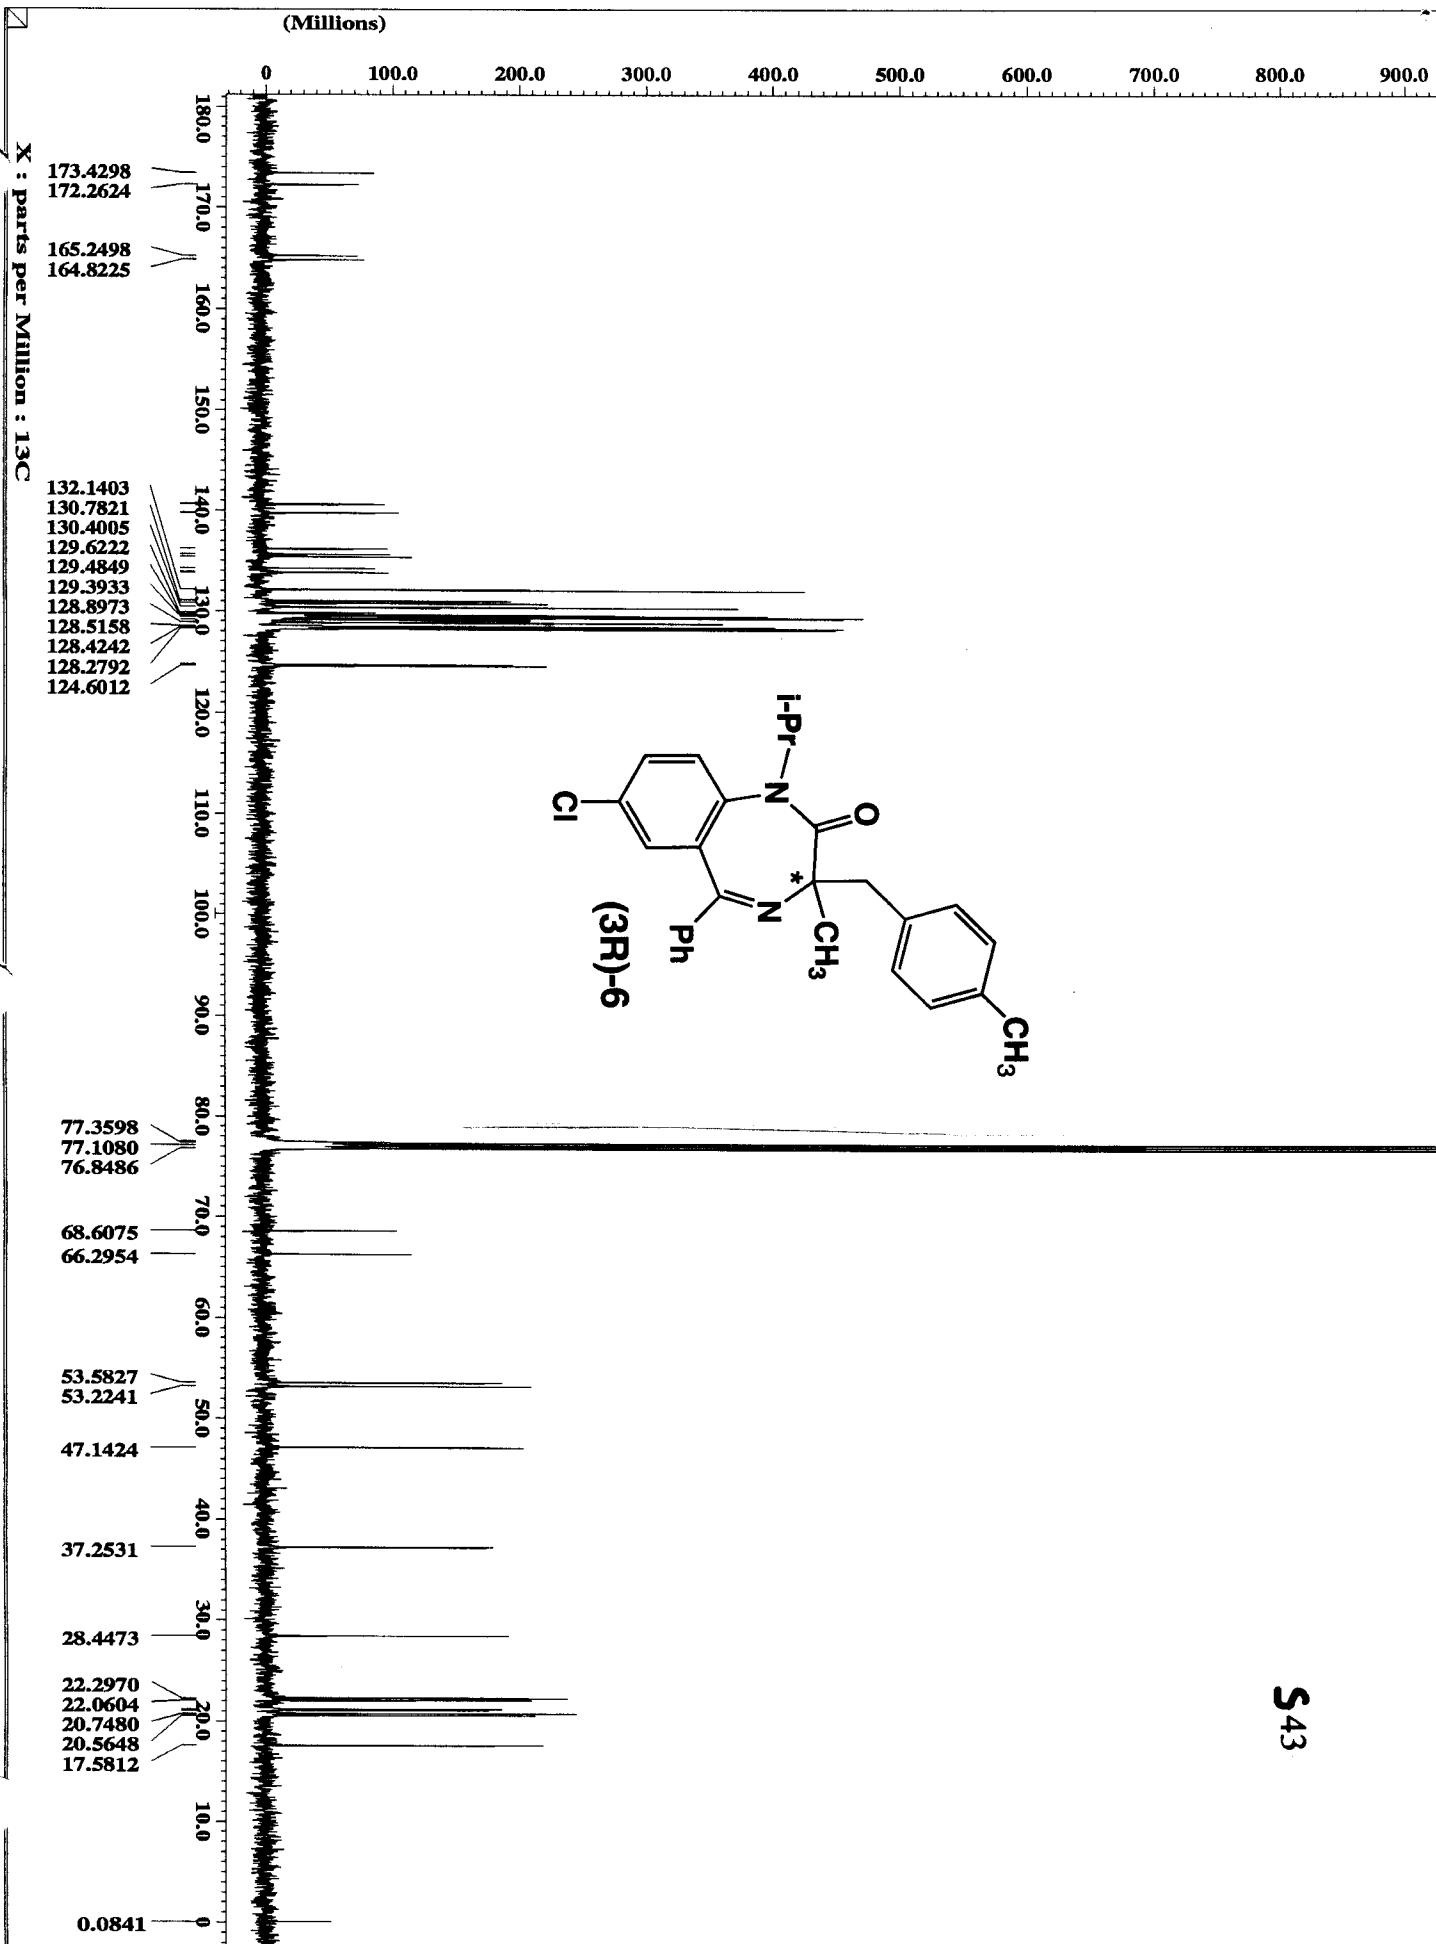

Project Name: HONGWU  
Reported by User: HongWu

S<sup>44</sup>

Breeze

## SAMPLE INFORMATION

Sample Name: HWZ-IV-P13-AD-H  
Sample Type: Unknown  
Vial: 1  
Injection #: 1  
Injection Volume: 10.00 ul  
Run Time: 30.00 Minutes

Acquired By: HongWu  
Date Acquired: 4/25/03 4:49:49 PM  
Acq. Method: 1%B  
Date Processed: 4/25/03 5:20:04 PM  
Channel Name: 2487Channel 1  
Sample Set Name: Hongw u

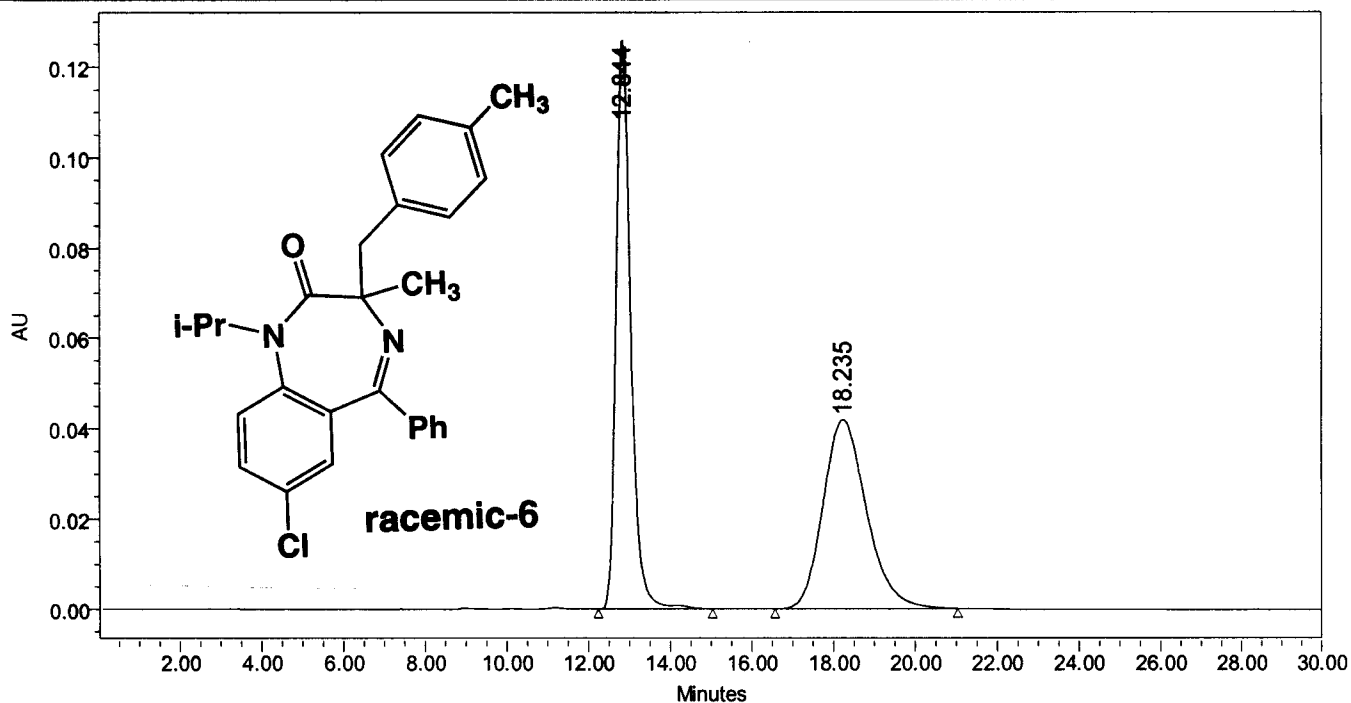

|   | RT<br>(min) | Area<br>( $\mu V \cdot sec$ ) | % Area | Height<br>( $\mu V$ ) | %<br>Height |
|---|-------------|-------------------------------|--------|-----------------------|-------------|
| 1 | 12.844      | 3154779                       | 50.48  | 125890                | 75.08       |
| 2 | 18.235      | 3095214                       | 49.52  | 41793                 | 24.92       |

Project Name: HONGWU  
Reported by User: HongWu

S<sup>45</sup>

Breeze

## SAMPLE INFORMATION

Sample Name: HWZ-IV-P15-AD-H  
Sample Type: Unknown  
Vial: 1  
Injection #: 1  
Injection Volume: 10.00 ul  
Run Time: 30.00 Minutes

Acquired By: HongWu  
Date Acquired: 4/25/03 4:00:47 PM  
Acq. Method: 1%B  
Date Processed: 4/25/03 4:32:16 PM  
Channel Name: 2487Channel 1  
Sample Set Name: Hongw u

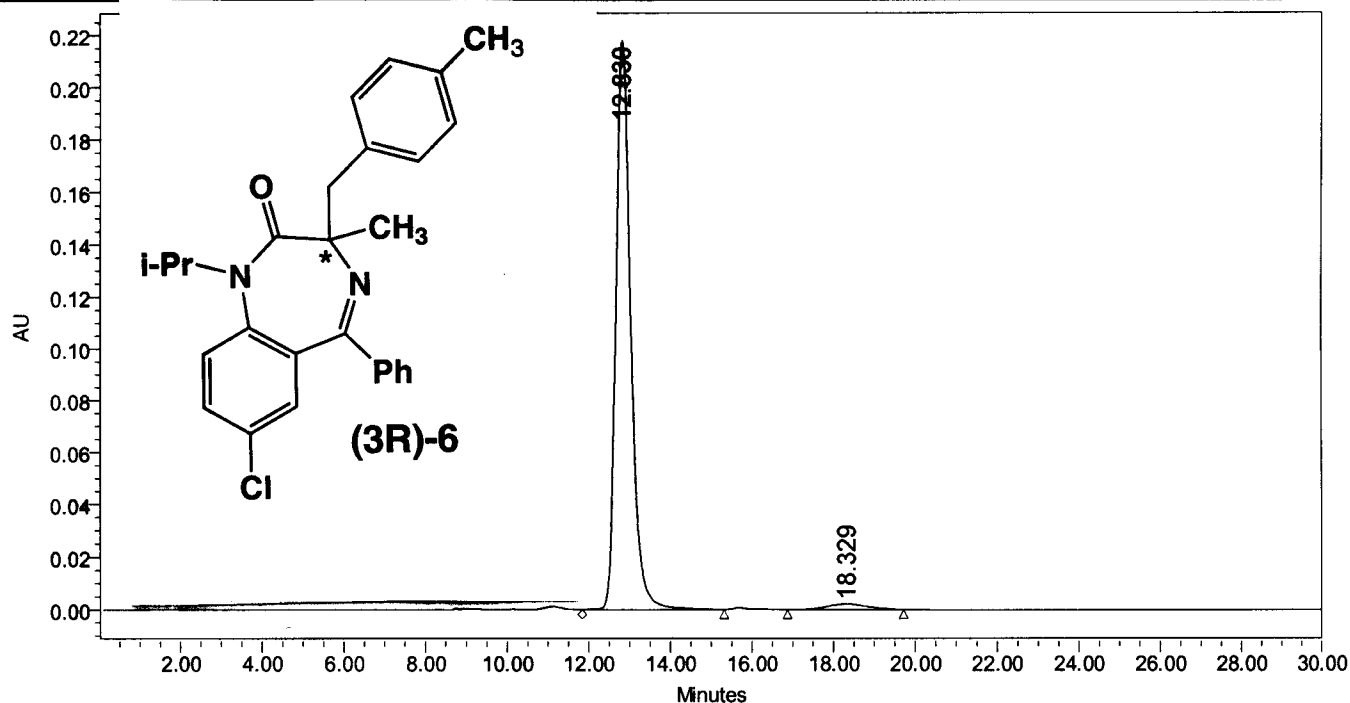

|   | RT<br>(min) | Area<br>( $\mu\text{V}\cdot\text{sec}$ ) | % Area | Height<br>( $\mu\text{V}$ ) | %<br>Height |
|---|-------------|------------------------------------------|--------|-----------------------------|-------------|
| 1 | 12.830      | 5520068                                  | 97.59  | 217745                      | 99.08       |
| 2 | 18.329      | 136467                                   | 2.41   | 2026                        | 0.92        |

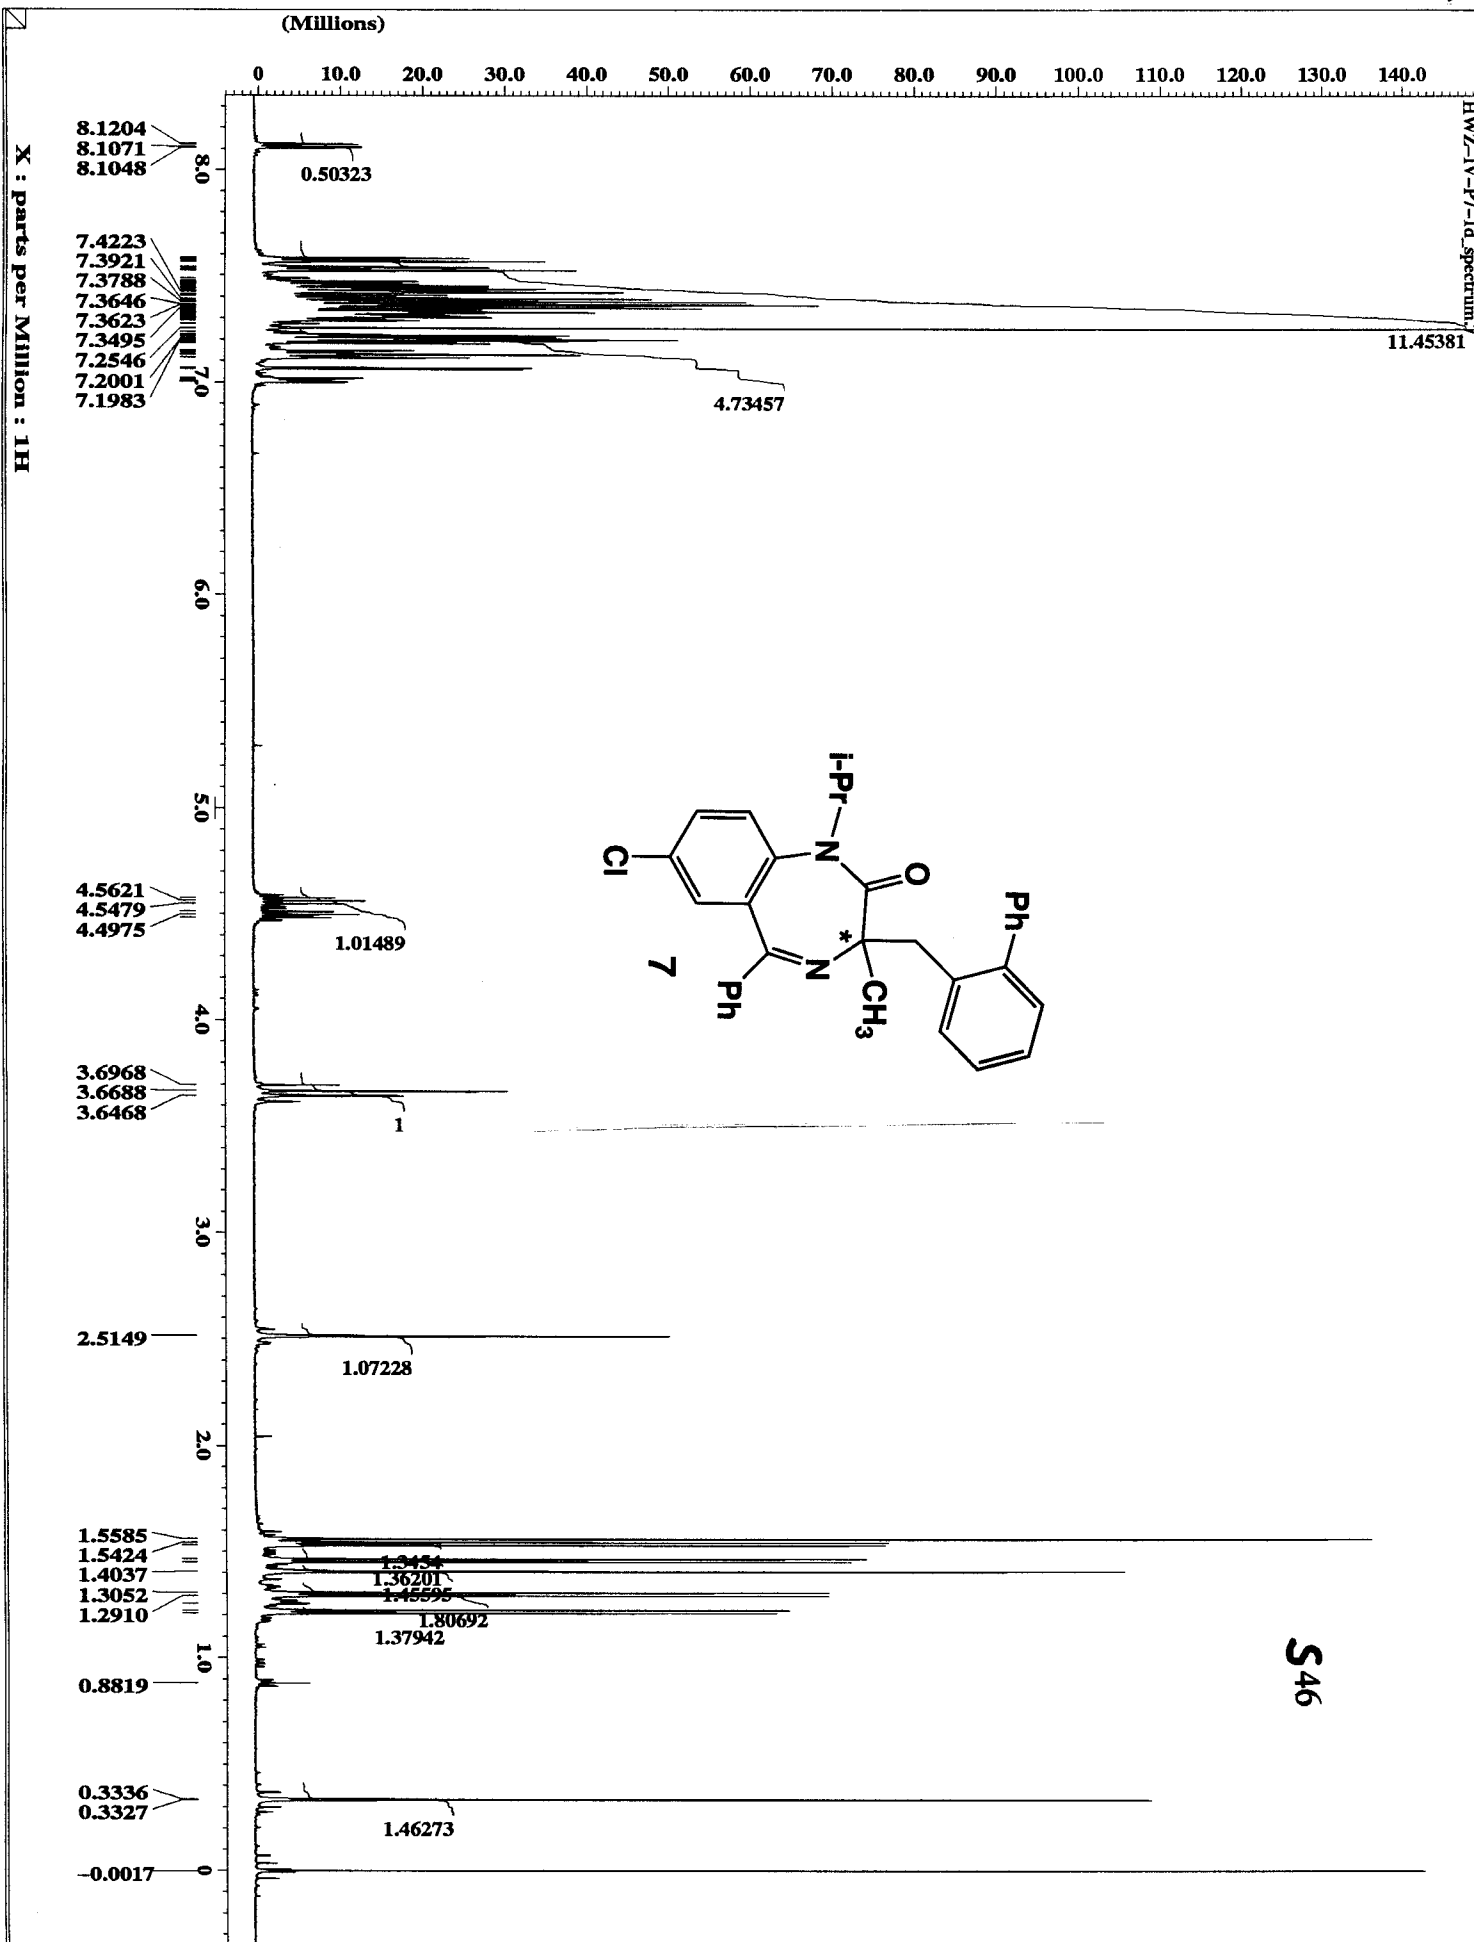

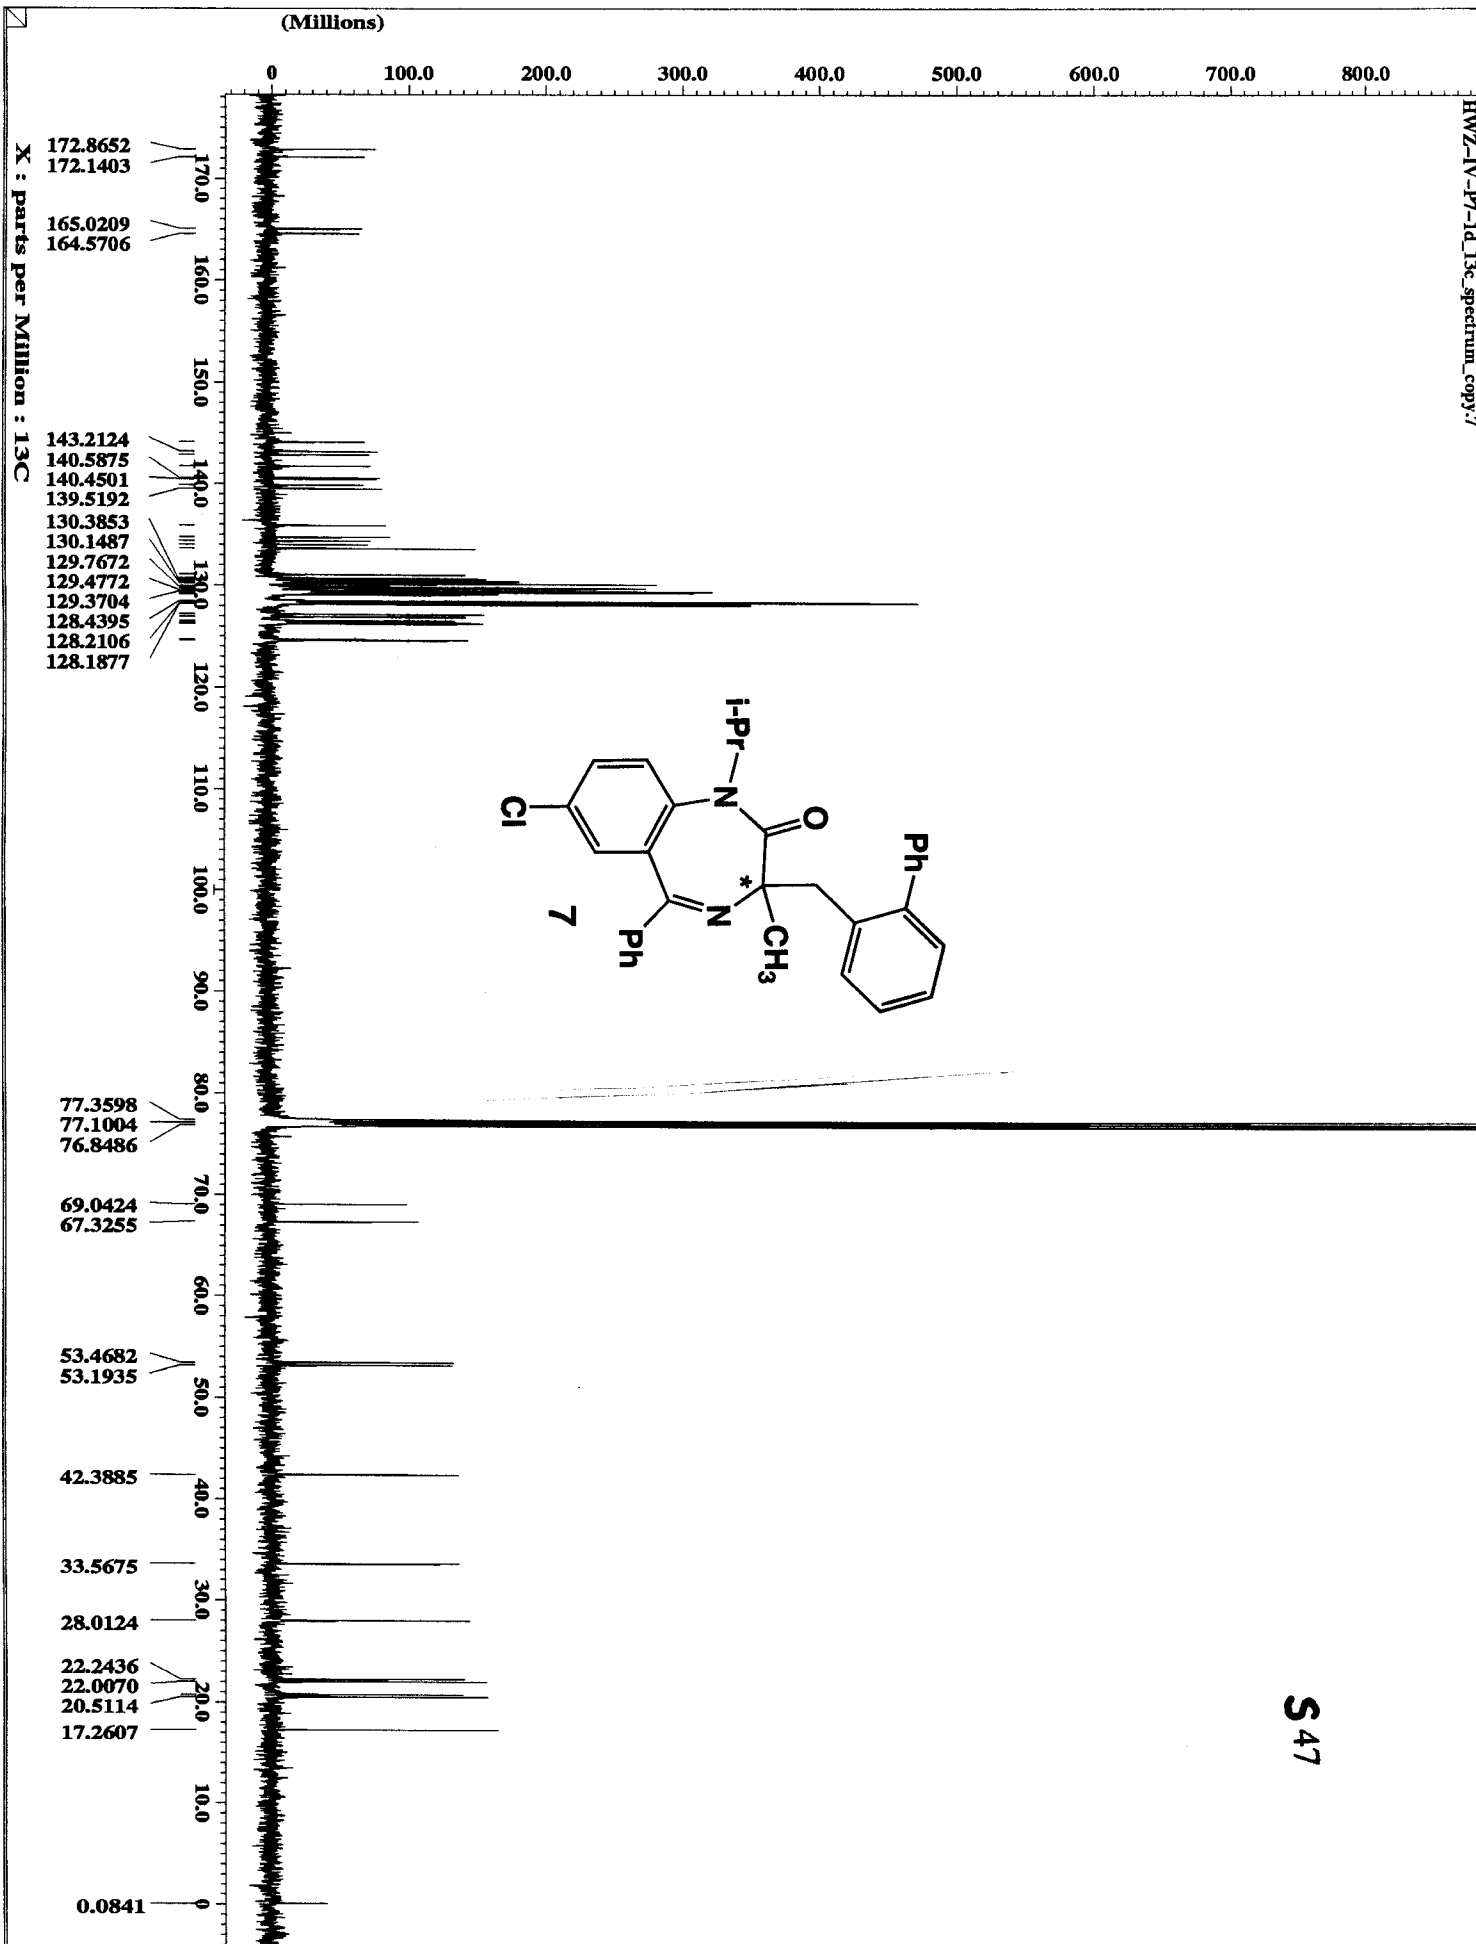

Project Name: HONGWU  
Reported by User: HongWu

S48

Breeze

## SAMPLE INFORMATION

Sample Name: HWZ-IV-P7-AD-H  
Sample Type: Unknown  
Vial: 1  
Injection #: 1  
Injection Volume: 10.00 ul  
Run Time: 30.00 Minutes

Acquired By: HongWu  
Date Acquired: 4/23/03 3:21:18 PM  
Acq. Method: 1%B  
Date Processed: 4/23/03 8:08:08 PM  
Channel Name: 2487Channel 1  
Sample Set Name: Hongw u

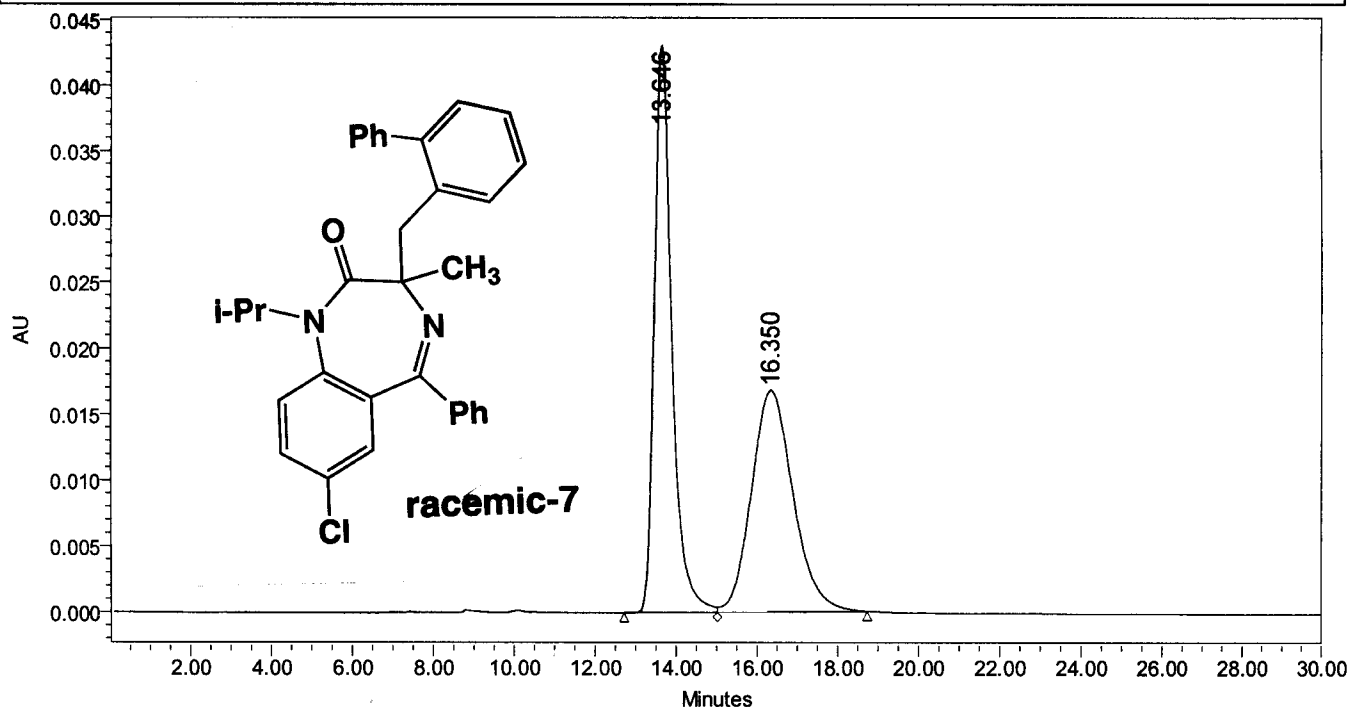

|   | RT<br>(min) | Area<br>( $\mu\text{V}\cdot\text{sec}$ ) | % Area | Height<br>( $\mu\text{V}$ ) | %<br>Height |
|---|-------------|------------------------------------------|--------|-----------------------------|-------------|
| 1 | 13.646      | 1291065                                  | 51.68  | 43049                       | 71.93       |
| 2 | 16.350      | 1207204                                  | 48.32  | 16797                       | 28.07       |



Project Name: HONGWU  
Reported by User: HongWu

S 49

Breeze

## SAMPLE INFORMATION

Sample Name: HWZ-IV-P11-AD-H  
Sample Type: Unknown  
Vial: 1  
Injection #: 1  
Injection Volume: 10.00 ul  
Run Time: 25.00 Minutes

Acquired By: HongWu  
Date Acquired: 4/23/03 5:22:57 PM  
Acq. Method: 1%B  
Date Processed: 4/23/03 6:11:50 PM  
Channel Name: 2487Channel 1  
Sample Set Name: Hongwu

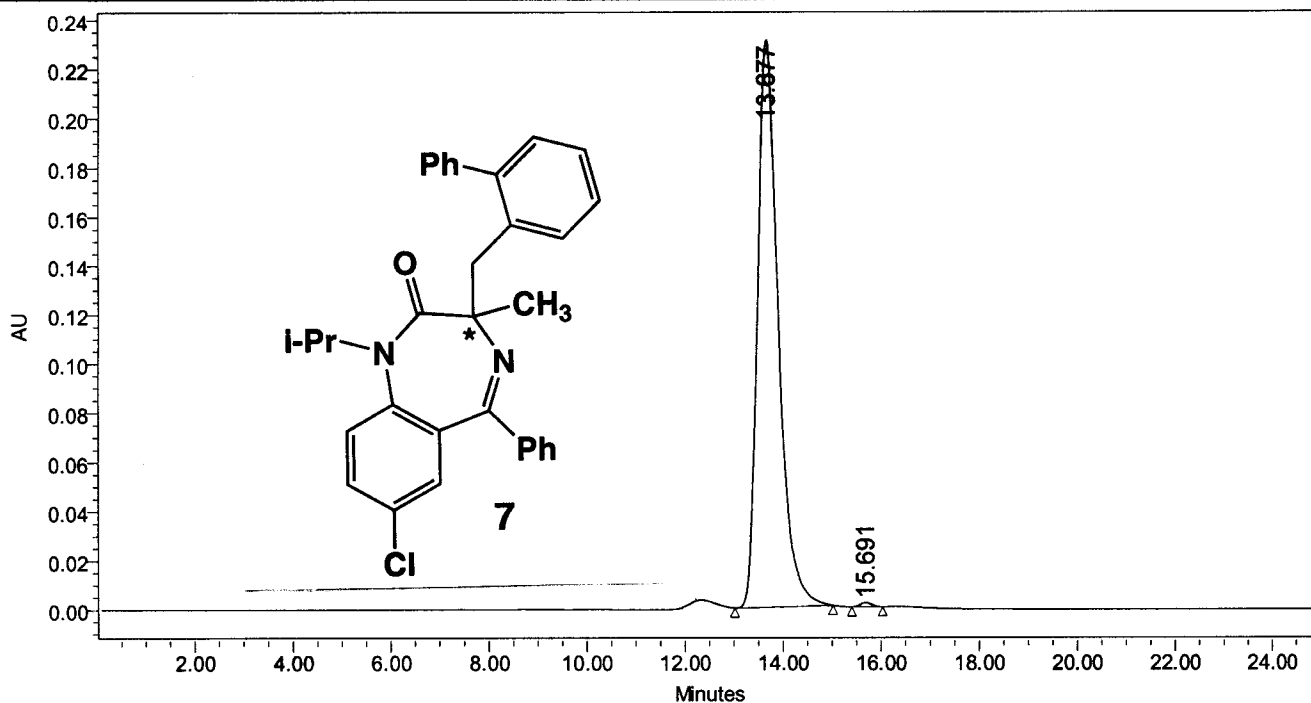

|   | RT<br>(min) | Area<br>( $\mu\text{V}\cdot\text{sec}$ ) | % Area | Height<br>( $\mu\text{V}$ ) | %<br>Height |
|---|-------------|------------------------------------------|--------|-----------------------------|-------------|
| 1 | 13.677      | 6756582                                  | 99.59  | 230796                      | 99.25       |
| 2 | 15.691      | 27898                                    | 0.41   | 1755                        | 0.75        |

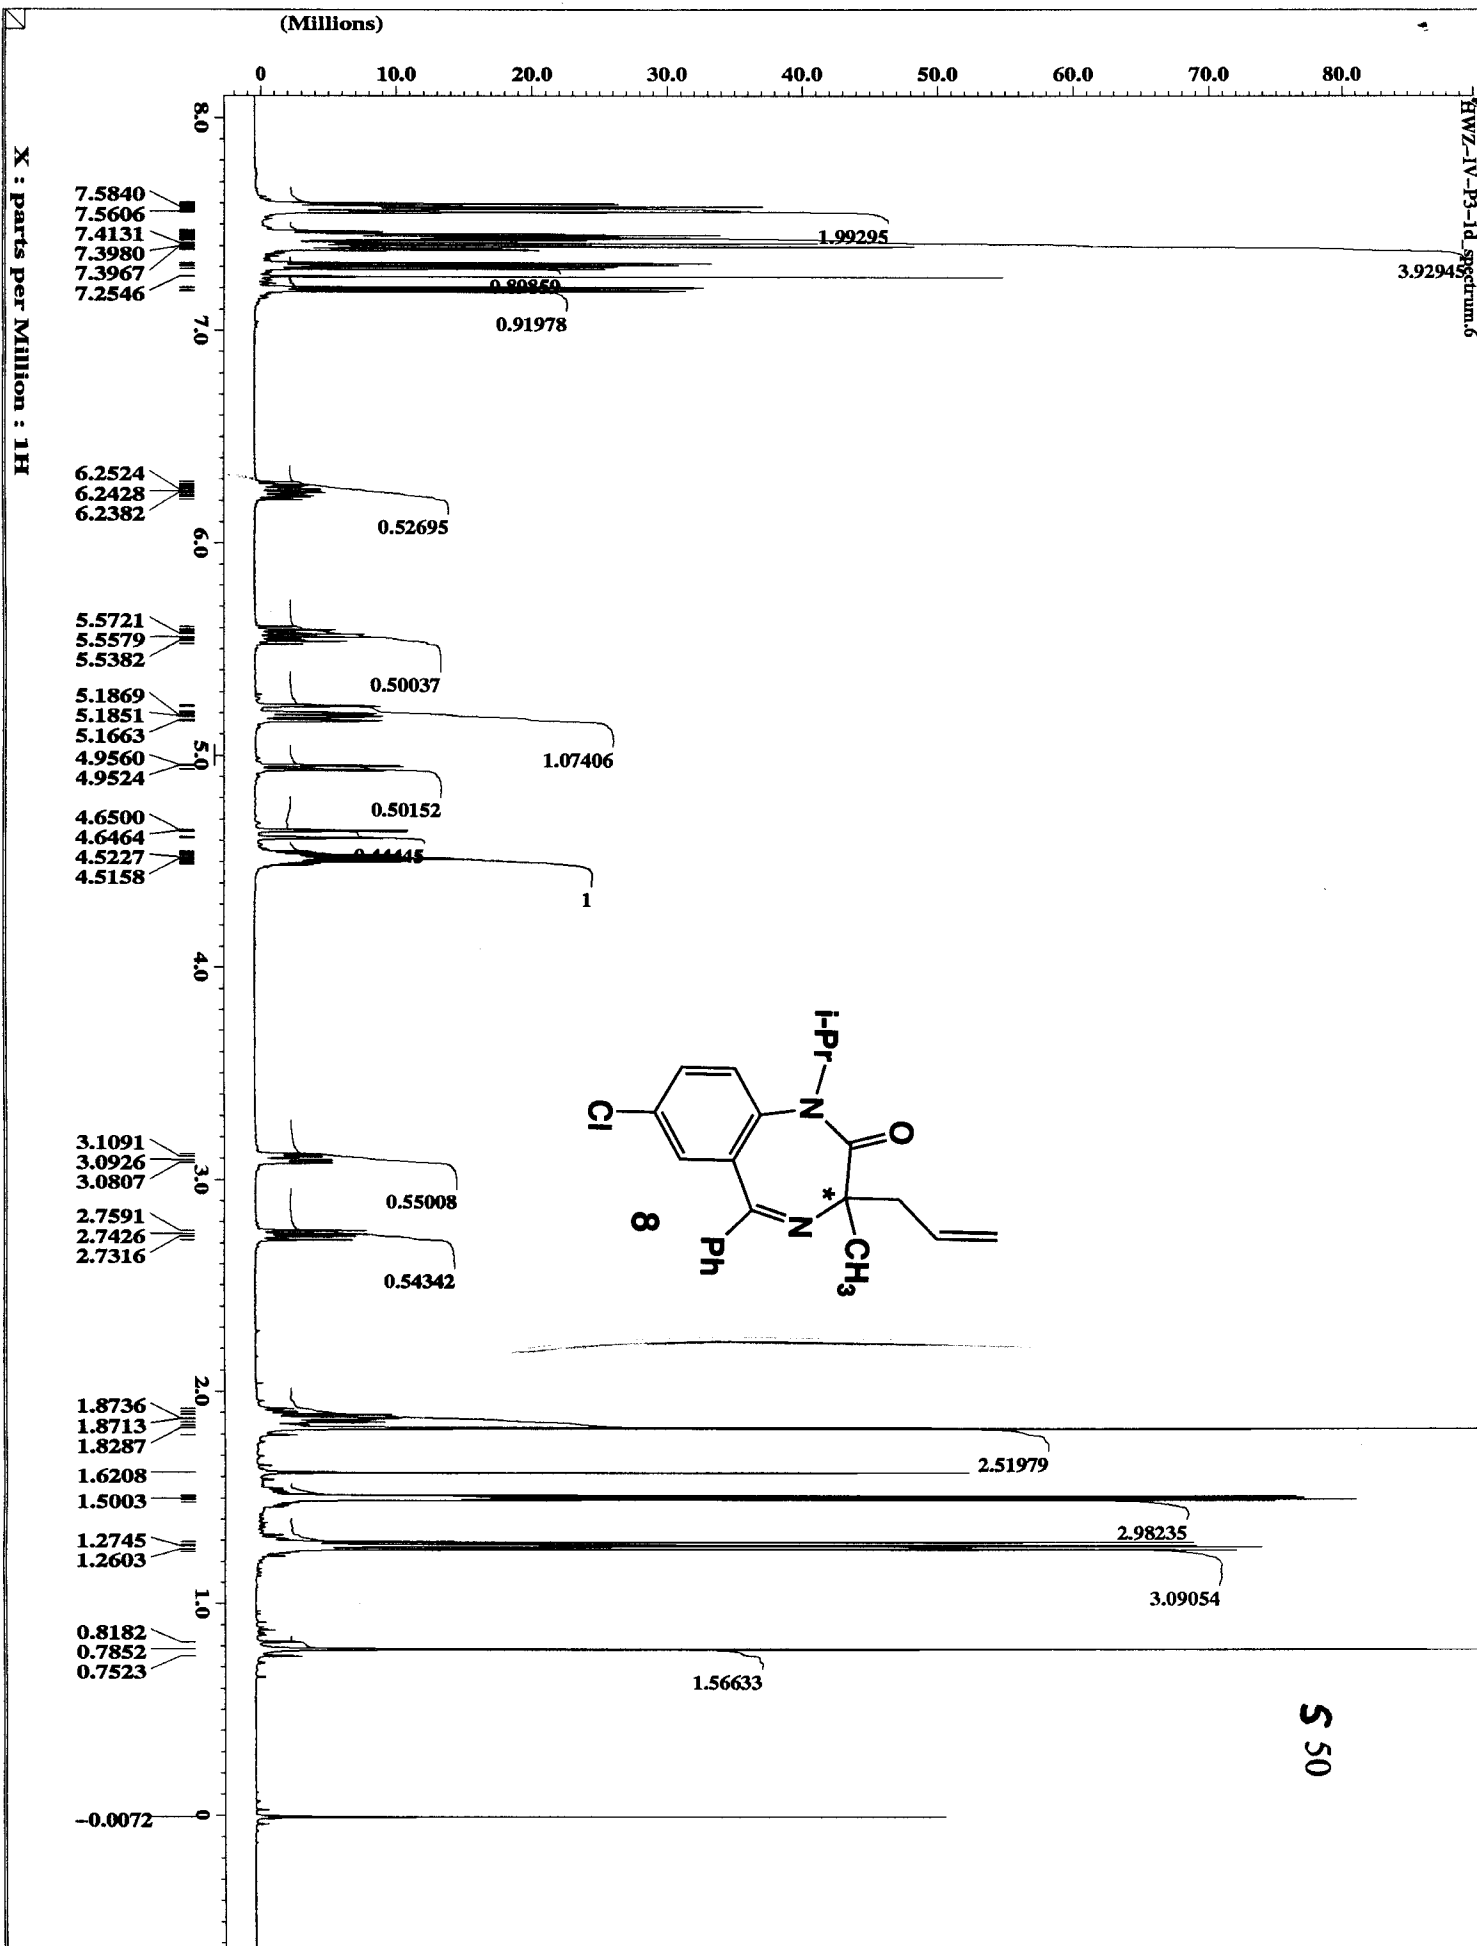

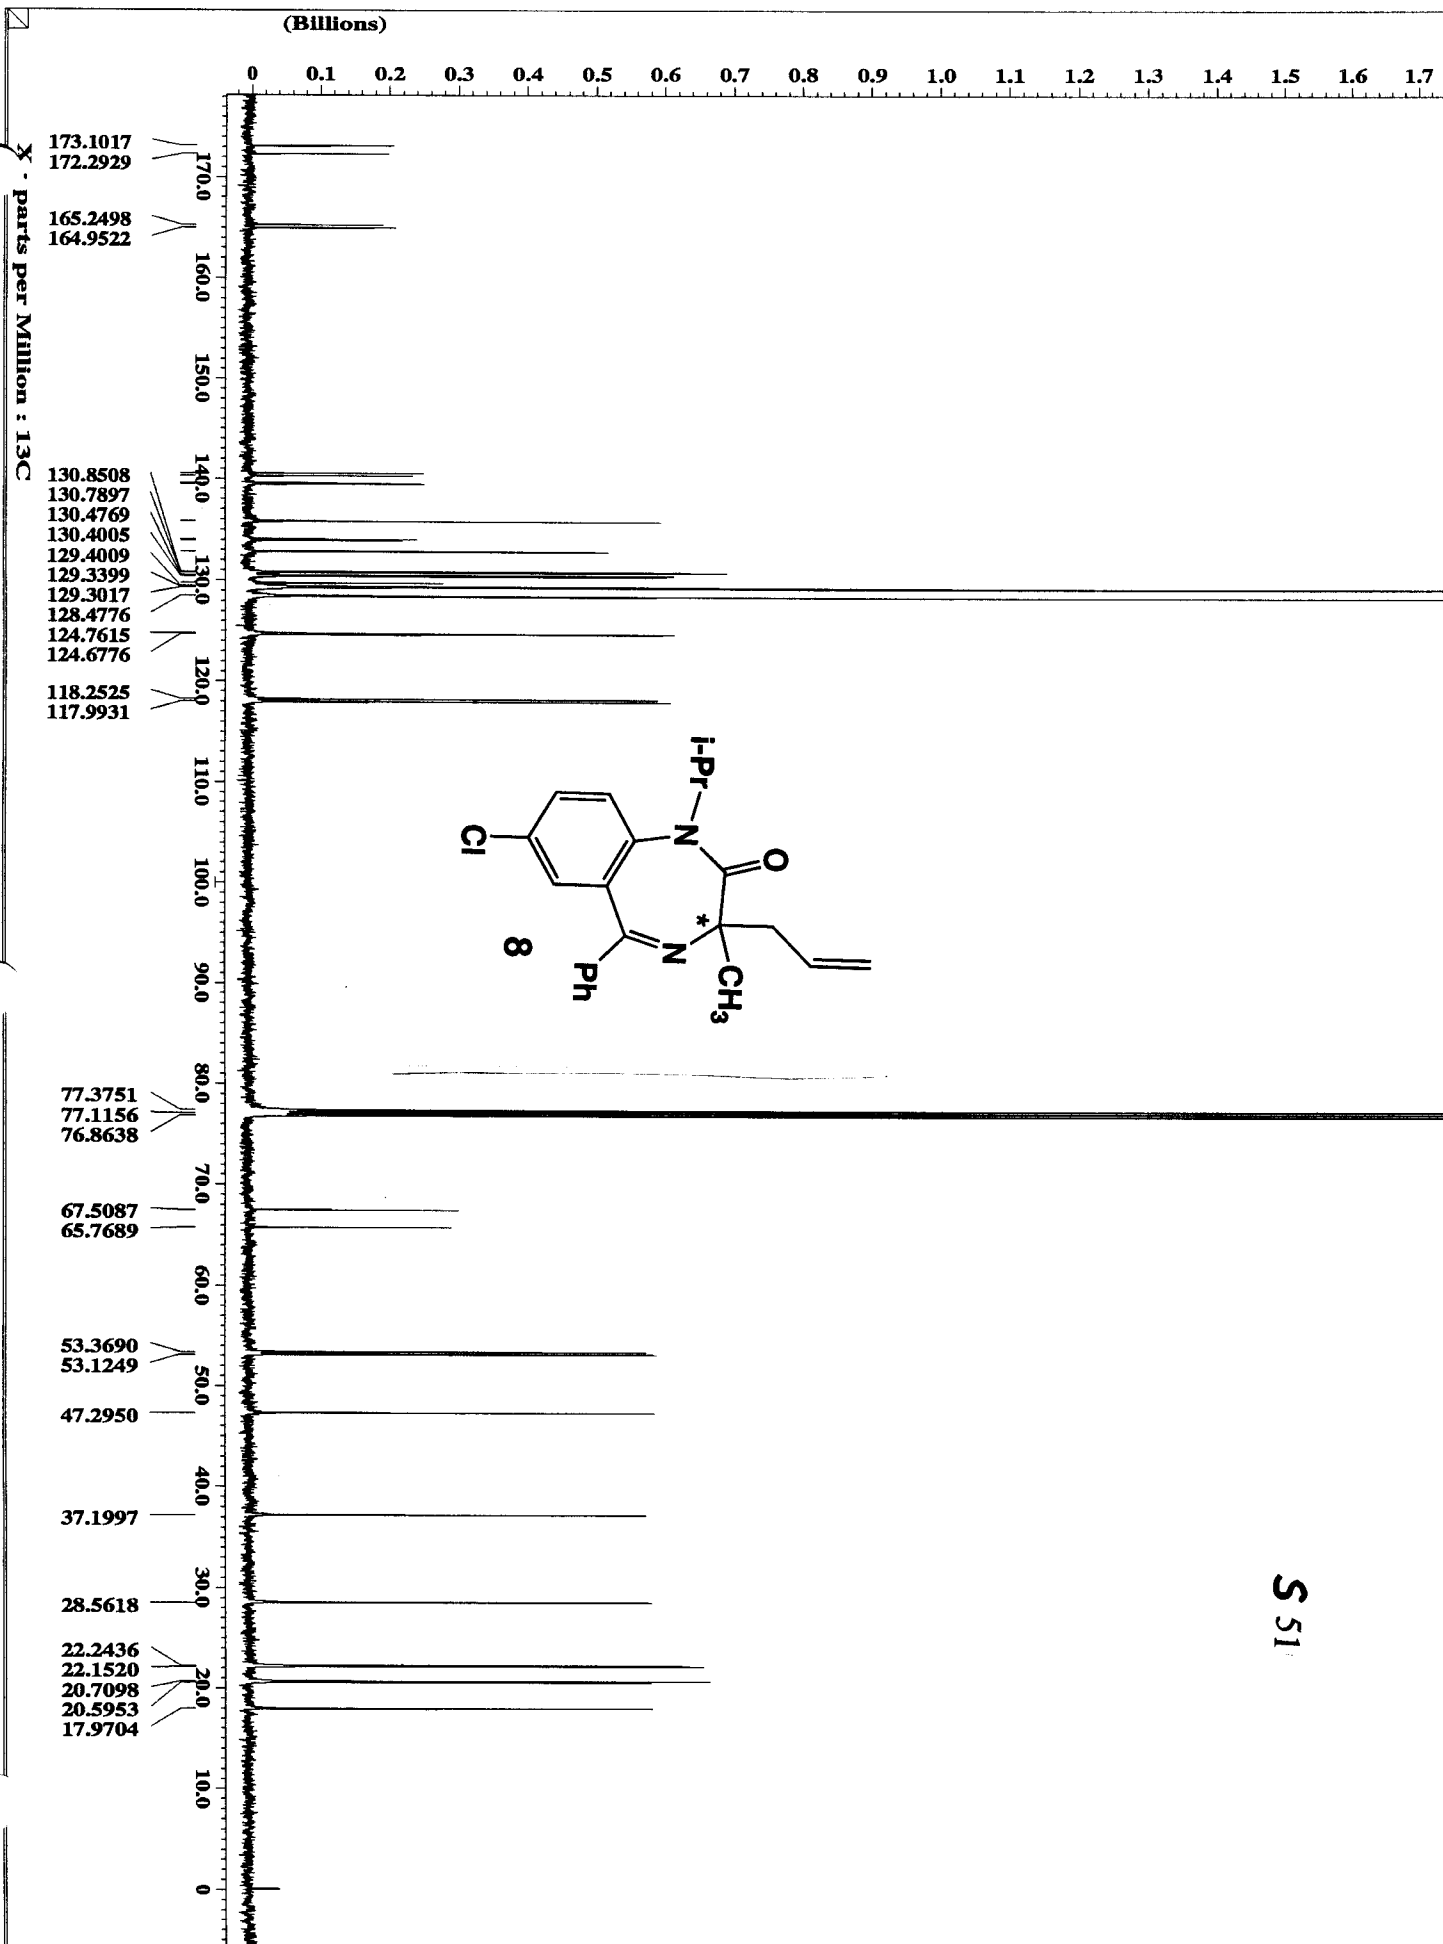

Project Name: HONGWU  
Reported by User: HongWu

S52

Breeze

## SAMPLE INFORMATION

Sample Name: HWZ-IV-P3-OD  
Sample Type: Unknown  
Vial: 1  
Injection #: 1  
Injection Volume: 10.00  $\mu$ l  
Run Time: 30.00 Minutes

Acquired By: HongWu  
Date Acquired: 4/17/03 6:28:37 PM  
Acq. Method: 0%B isopropanol  
Date Processed: 4/17/03 6:58:51 PM  
Channel Name: 2487Channel 1  
Sample Set Name: Hongw u

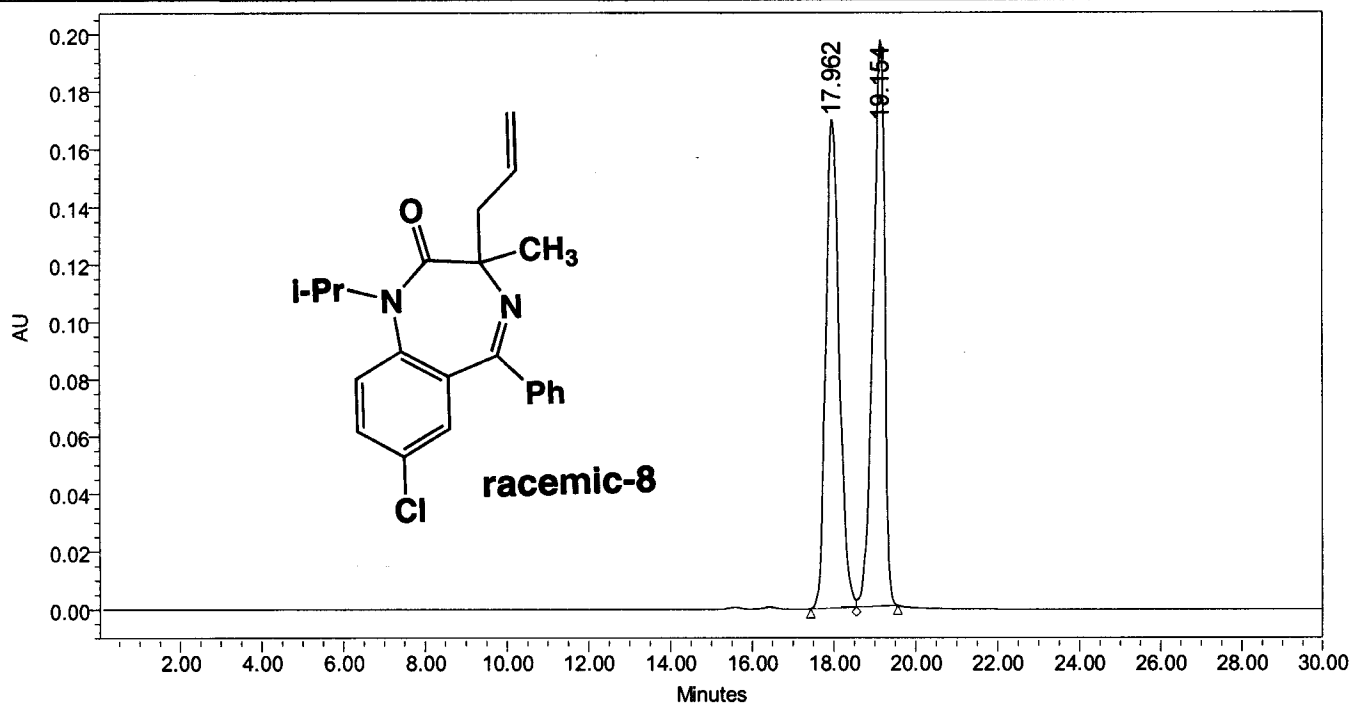

|   | RT<br>(min) | Area<br>( $\mu$ V*sec) | % Area | Height<br>( $\mu$ V) | %<br>Height |
|---|-------------|------------------------|--------|----------------------|-------------|
| 1 | 17.962      | 3889478                | 49.94  | 169555               | 46.32       |
| 2 | 19.154      | 3898105                | 50.06  | 196479               | 53.68       |

Project Name: HONGWU  
Reported by User: HongWu

S53

Breeze

## SAMPLE INFORMATION

Sample Name: HWZ-IV-P5-OD  
Sample Type: Unknown  
Vial: 1  
Injection #: 1  
Injection Volume: 10.00 ul  
Run Time: 30.00 Minutes

Acquired By: HongWu  
Date Acquired: 4/17/03 7:22:17 PM  
Acq. Method: 0%B isopropanol  
Date Processed: 4/17/03 7:52:31 PM  
Channel Name: 2487Channel 1  
Sample Set Name: Hongw u

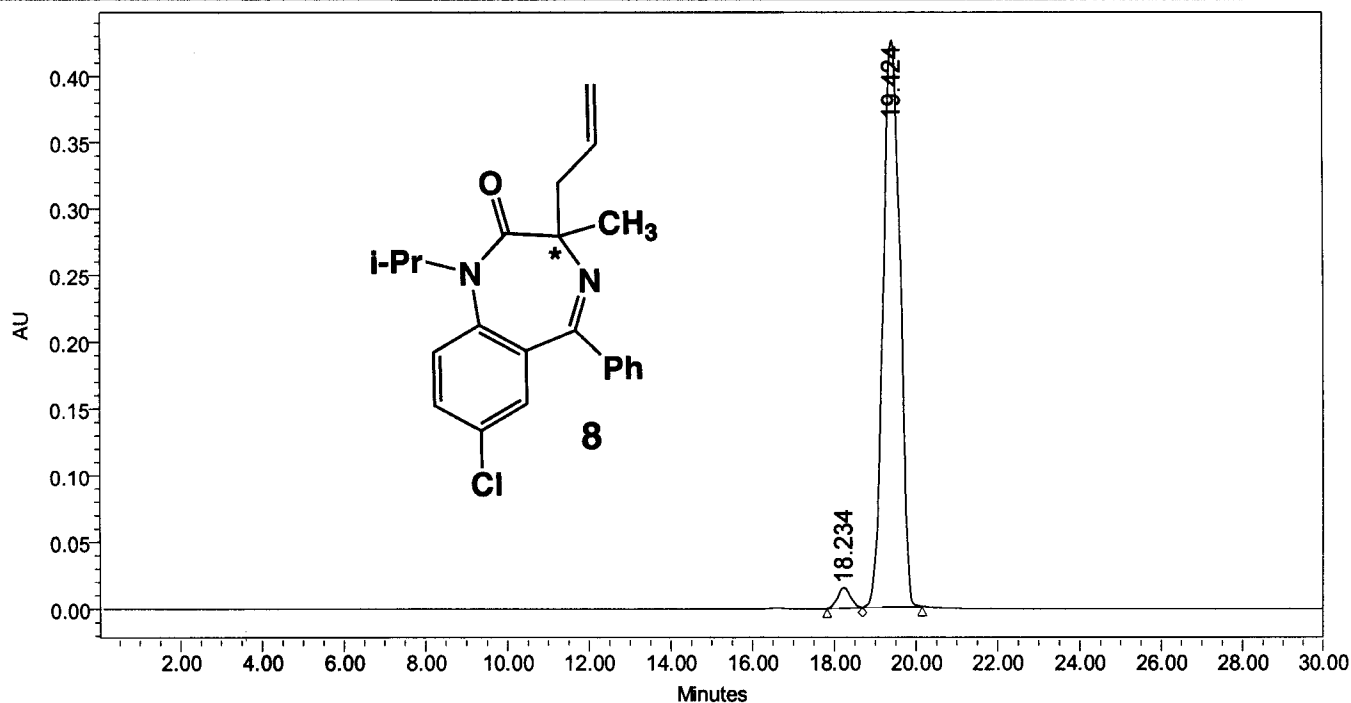

|   | RT<br>(min) | Area<br>( $\mu\text{V}\cdot\text{sec}$ ) | % Area | Height<br>( $\mu\text{V}$ ) | %<br>Height |
|---|-------------|------------------------------------------|--------|-----------------------------|-------------|
| 1 | 18.234      | 333203                                   | 2.66   | 15034                       | 3.41        |
| 2 | 19.424      | 12187607                                 | 97.34  | 425717                      | 96.59       |

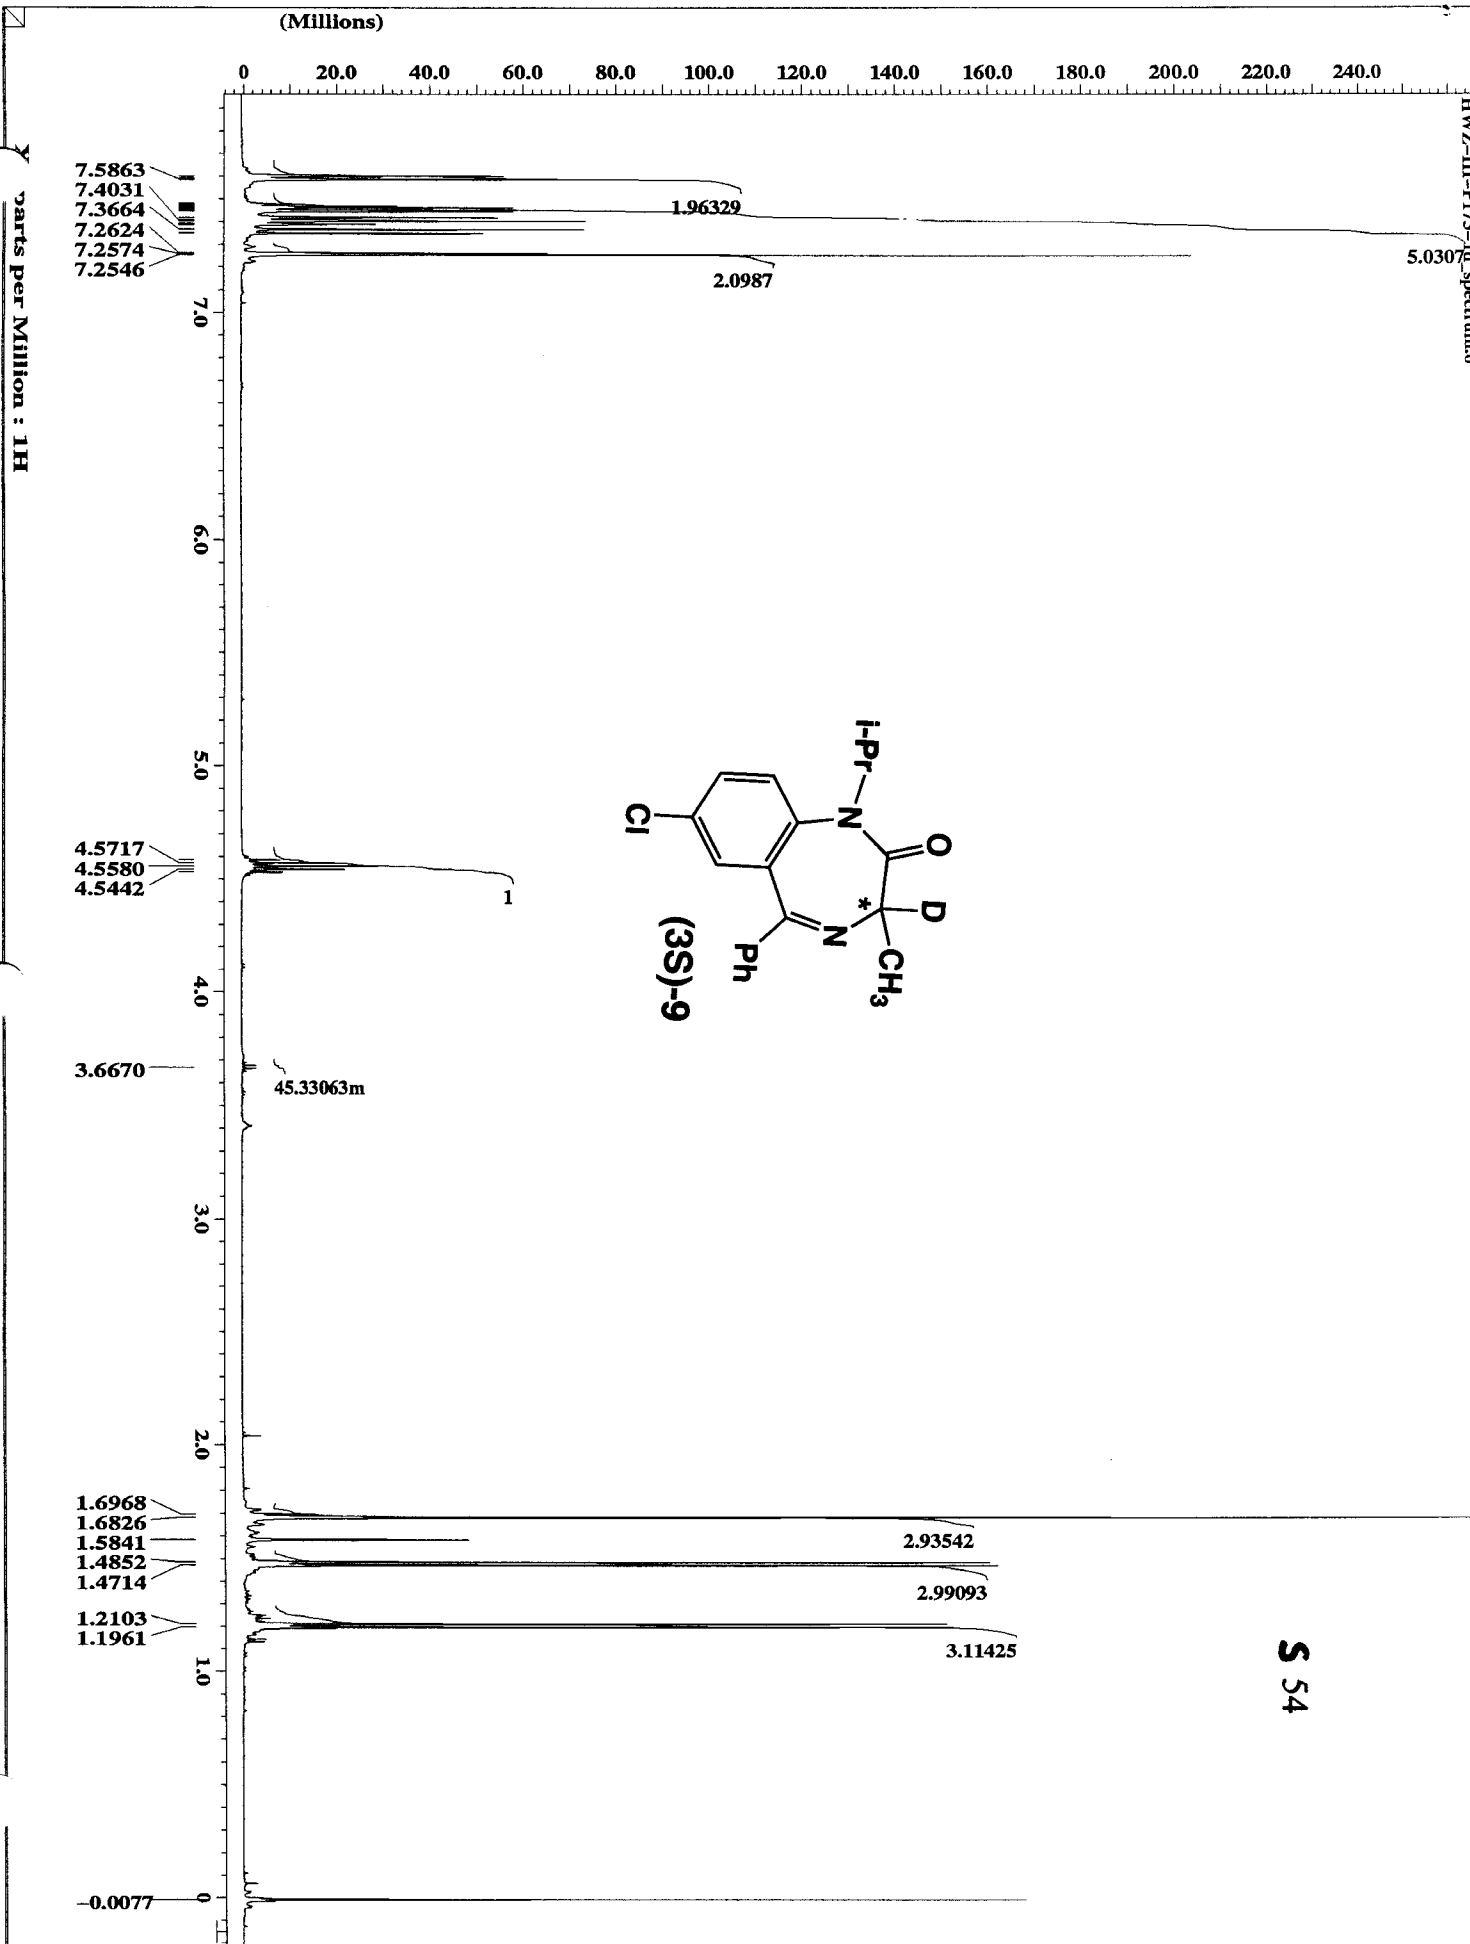

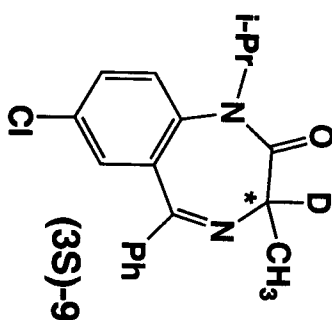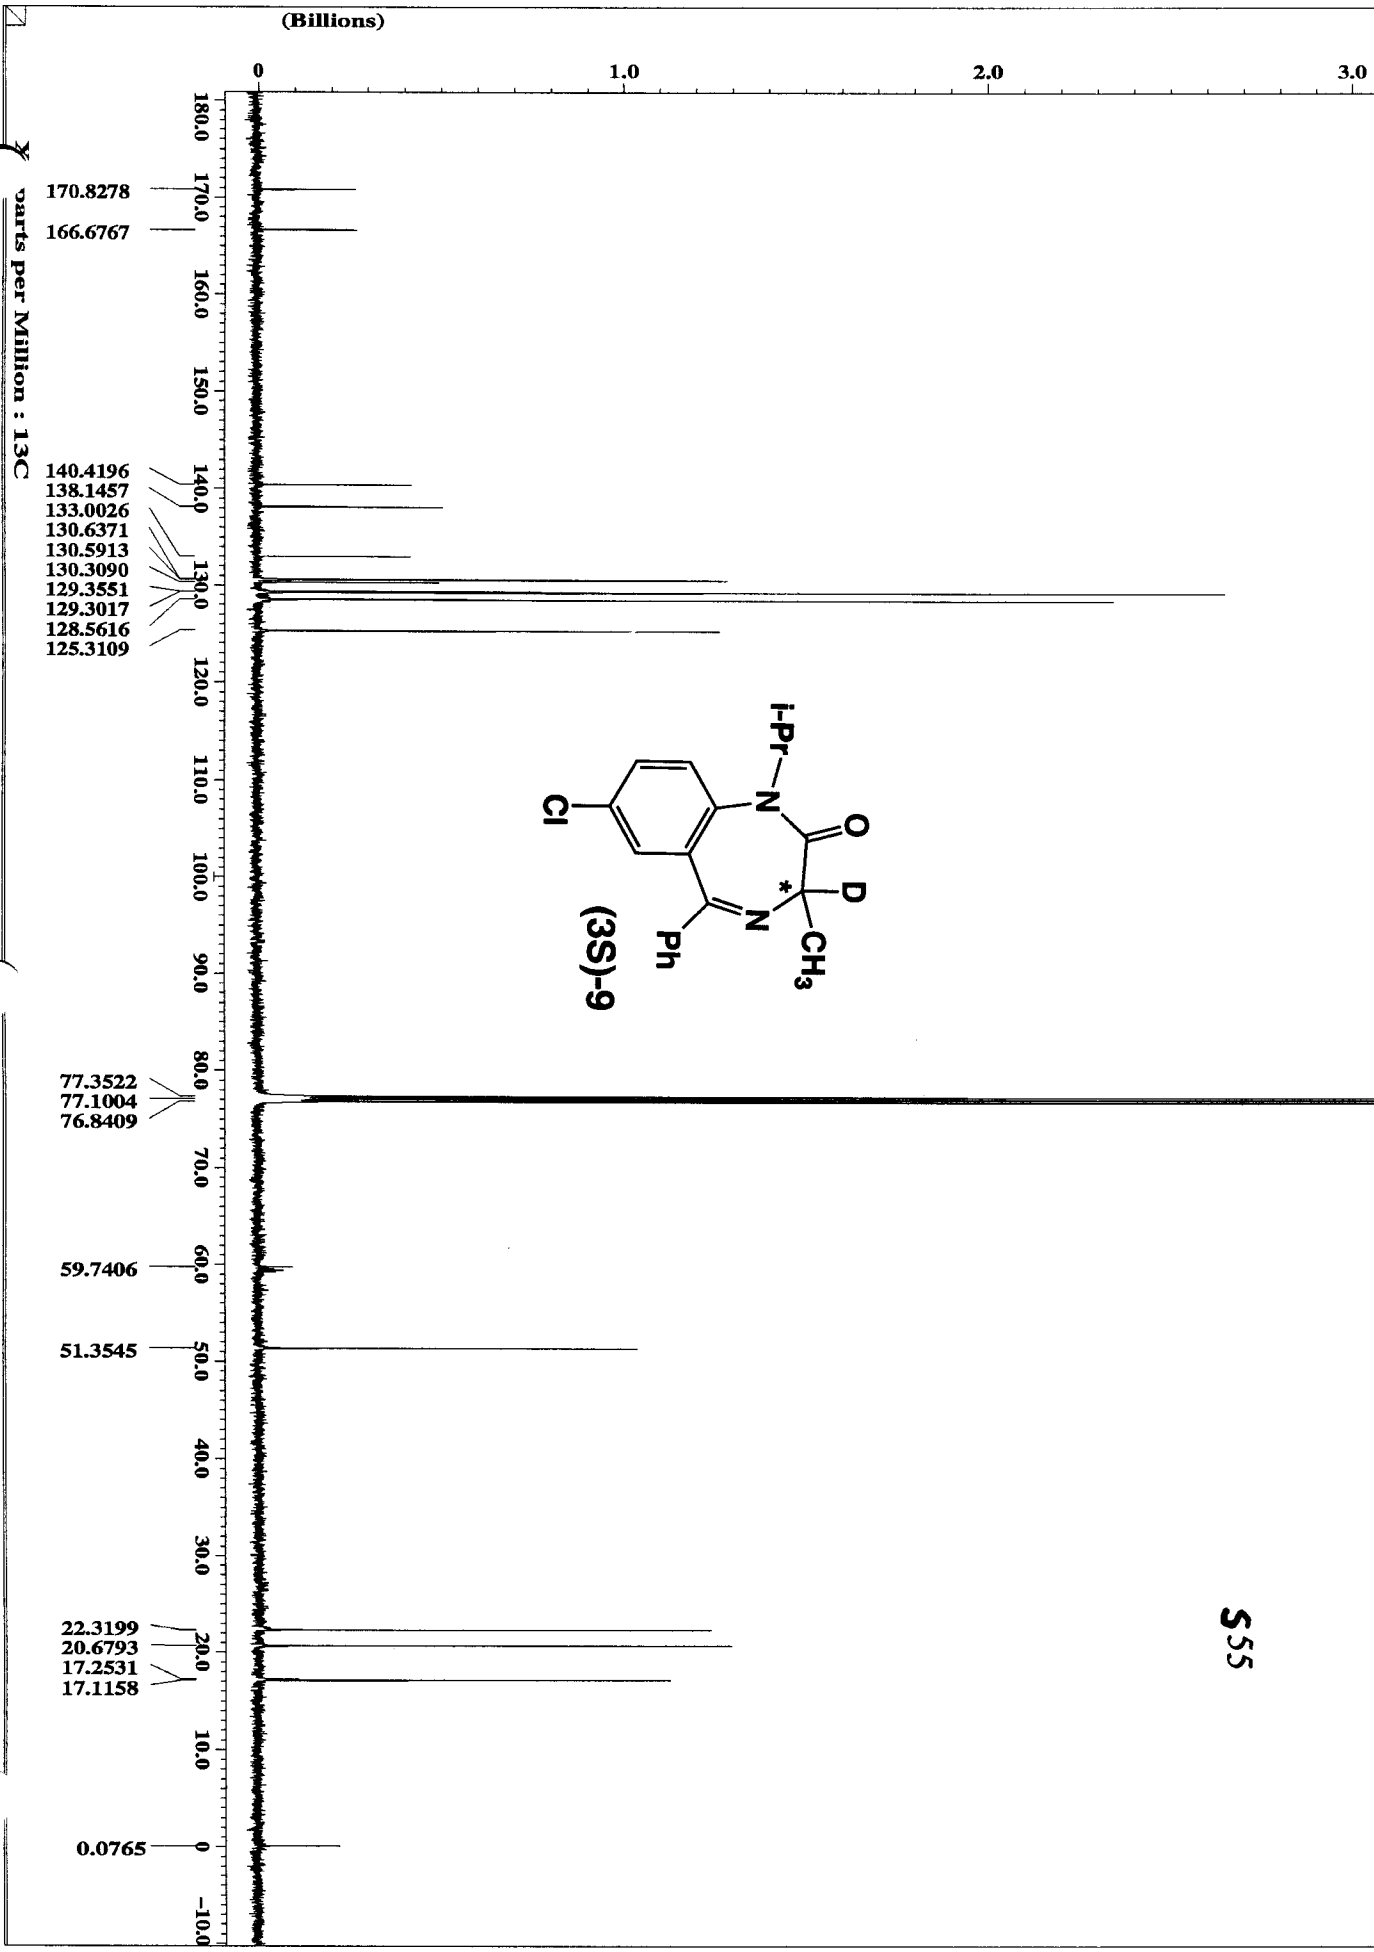

Project Name: HONGWU  
Reported by User: HongWu

S 56

Breeze

## SAMPLE INFORMATION

Sample Name: HWZ-III-P169-AD  
Sample Type: Unknown  
Vial: 1  
Injection #: 1  
Injection Volume: 10.00  $\mu$ l  
Run Time: 25.00 Minutes

Acquired By: HongWu  
Date Acquired: 4/3/03 11:57:03 PM  
Acq. Method: 1%B  
Date Processed: 5/29/03 10:02:58 AM  
Channel Name: 2487Channel 1  
Sample Set Name: Hognwu

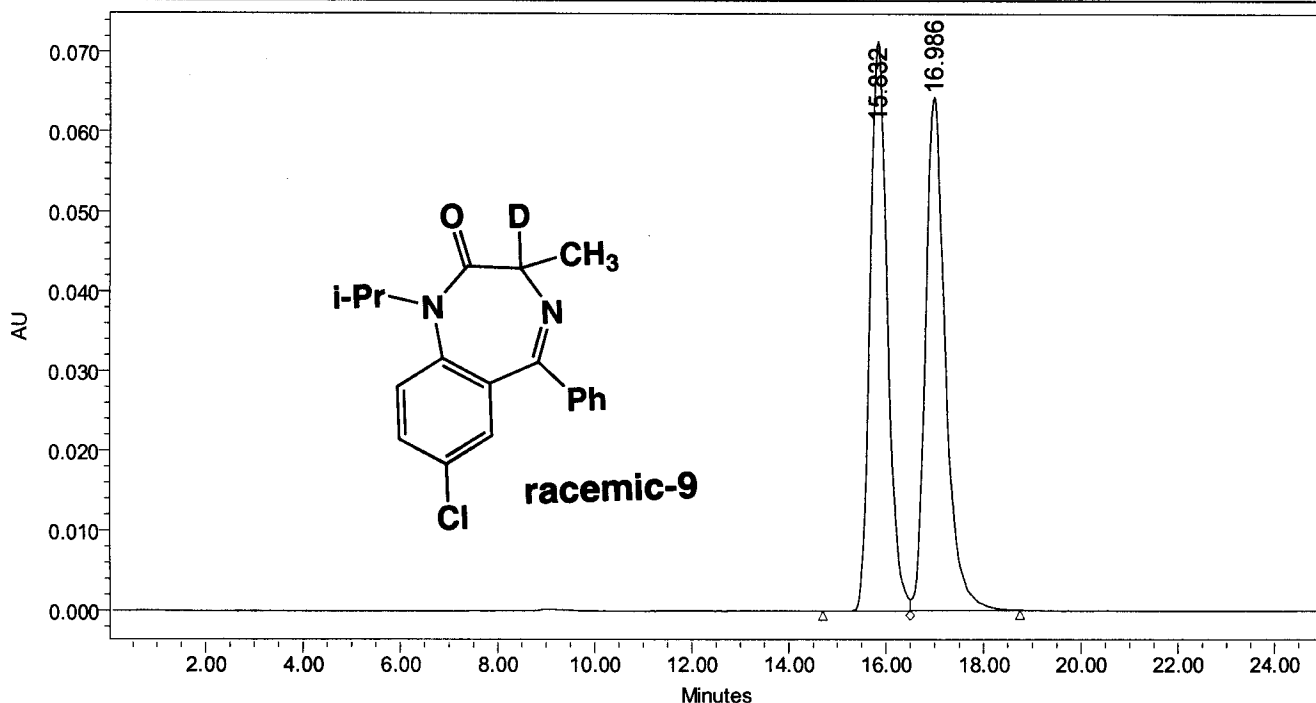

|   | RT<br>(min) | Area<br>( $\mu$ V*sec) | % Area | Height<br>( $\mu$ V) | %<br>Height |
|---|-------------|------------------------|--------|----------------------|-------------|
| 1 | 15.832      | 1770834                | 49.35  | 71374                | 52.58       |
| 2 | 16.986      | 1817580                | 50.65  | 64361                | 47.42       |



Project Name: HONGWU  
Reported by User: HongWu

S57 ~~Breeze~~

## SAMPLE INFORMATION

Sample Name: HWZ-III-P175-AD  
Sample Type: Unknown  
Vial: 1  
Injection #: 1  
Injection Volume: 10.00 ul  
Run Time: 25.00 Minutes

Acquired By: HongWu  
Date Acquired: 4/3/03 10:14:39 PM  
Acq. Method: 1%B  
Date Processed: 4/3/03 10:48:07 PM  
Channel Name: 2487Channel 1  
Sample Set Name: Hongwu

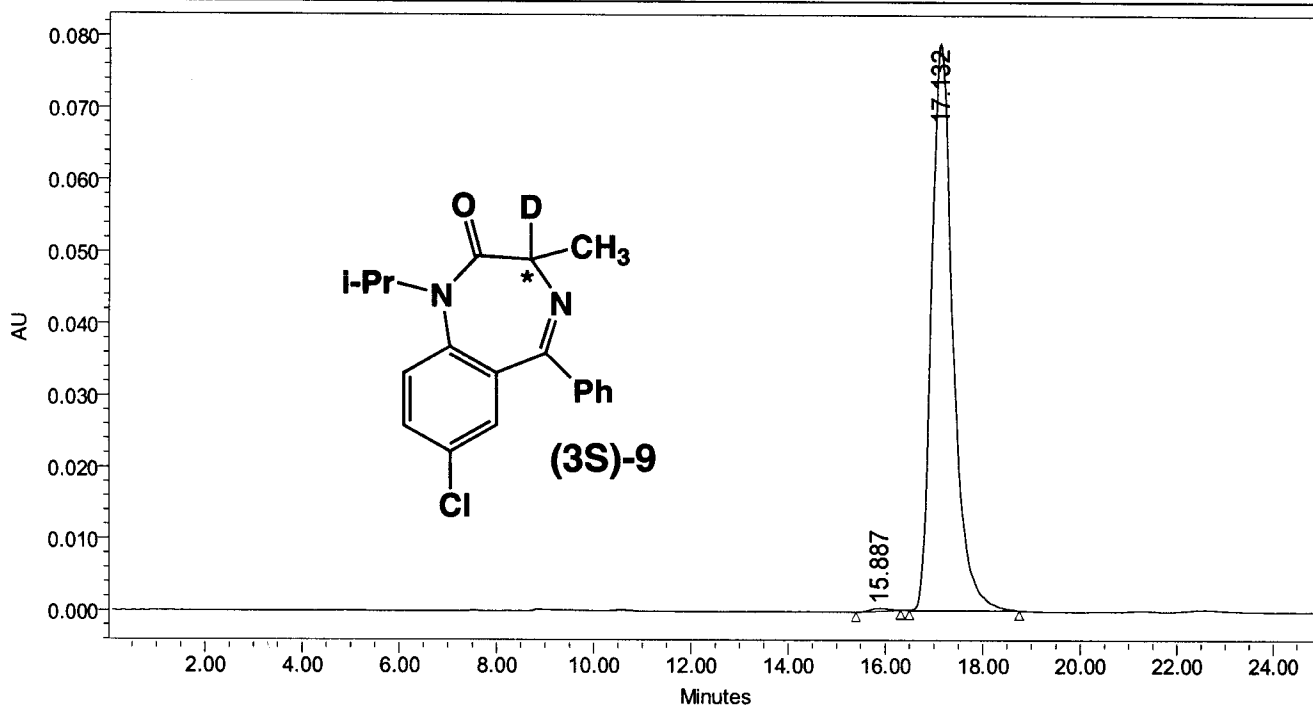

|   | RT<br>(min) | Area<br>( $\mu V \cdot \text{sec}$ ) | % Area | Height<br>( $\mu V$ ) | %<br>Height |
|---|-------------|--------------------------------------|--------|-----------------------|-------------|
| 1 | 15.887      | 8982                                 | 0.37   | 388                   | 0.49        |
| 2 | 17.132      | 2402732                              | 99.63  | 78919                 | 99.51       |

S58

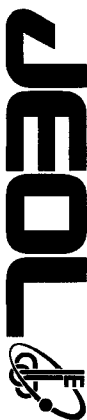

```

----- ACQUISITION PARAMETERS -----
Derived from: JCD-III-189-02-21-03.1
File Name      = JCD-III-189-02-21-03.1
Author         = carlier
Sample ID      = JCD-III-189-02-21-03
Content        = Single Pulse Experiment
Creation Date   = 21-MAY-2003 10:42:28

Revision Date   = 4-JUN-2003 13:15:32
Spec Site      = Eclipse+ 500

Spec Type      = DELTA_NMR
Data Format     = ID COMPLEX
Dimensions     = X
Dim Title      = 1H
Dim Size       = 32768
Dim Units      = [ppm]
Field Strength = 11.7473579 [T] (500 [MH
X_acq_duration = 4.3646976 [s]
X_domain       = 1H
X_freq         = 500.15991521 [MHz]
X_offset       = 51 [ppm]
X_points       = 32768
X_prescans     = 0
X_resolution   = 0.22911095 [Hz]
X_sweep        = 7.50750751 [kHz]
Mod_return     = 1
Scans          = 32
Total_scans    = 32

X_90_width     = 11.5 [us]
X_acq_time     = 4.3646976 [s]
X_angle        = 30 [deg]
X_pulse        = 3.83333333 [us]
Initial_wait   = 1 [s]
Phase_preset   = 3 [us]
Relaxation_delay = 1 [s]
Unblank_time   = 2 [us]

```

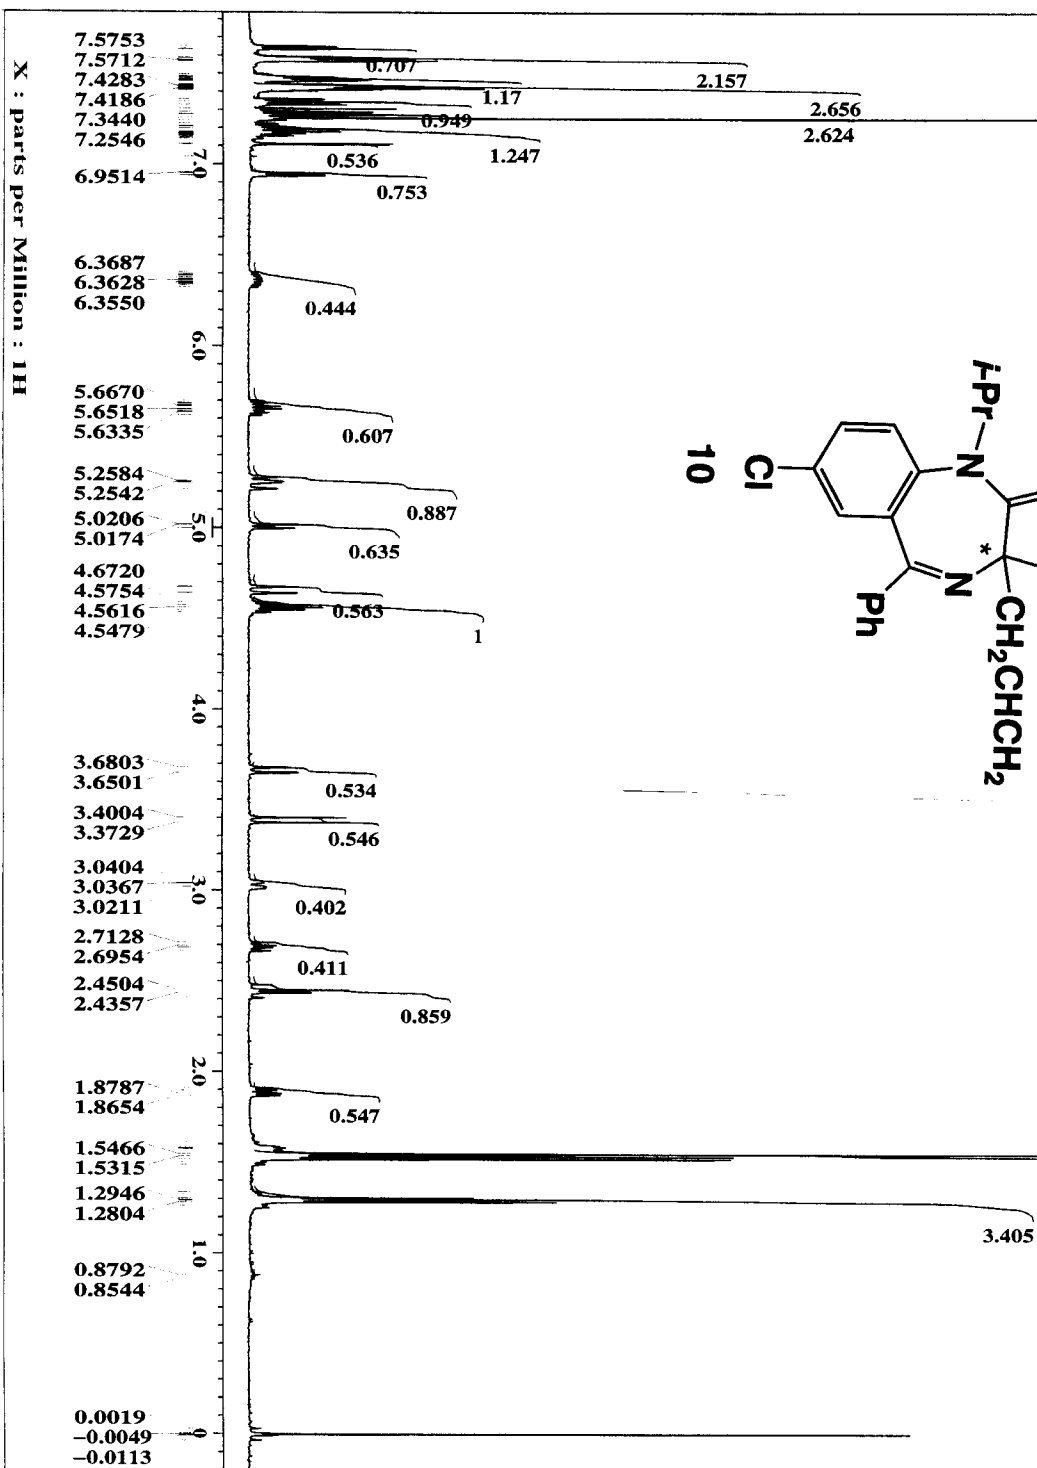

jcd-111-177

Archive directory: /export/home/robot/vnmrSYS/data  
 Sample directory: jcd-111-177\_10c3\_2003-04-29-180043

Pulse Sequence: szpul

Solvent: CDCl<sub>3</sub>

Ambient temperature

File: CARBON\_01

INOVA-400 "Inova400"

Relax. delay 1.000 sec

Pulse 45.0 degrees

Acq. time 1.199 sec

Width 25141.4 Hz

5000 repetitions

OBSERVE C13, 100.5654514 MHz

DECOUPLE H1, 399.9438386 MHz

Power 45 dB

continuously on

WALTZ-16 modulated

DATA PROCESSING

Line broadening 1.0 Hz

FT size 65536

Total time 3 hr, 4 min, 1 sec

Apr 29 2003

VA Tech Chemistry NMR Lab

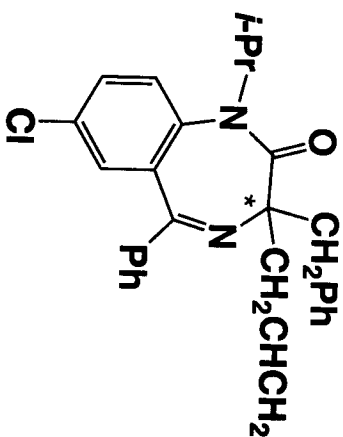

10

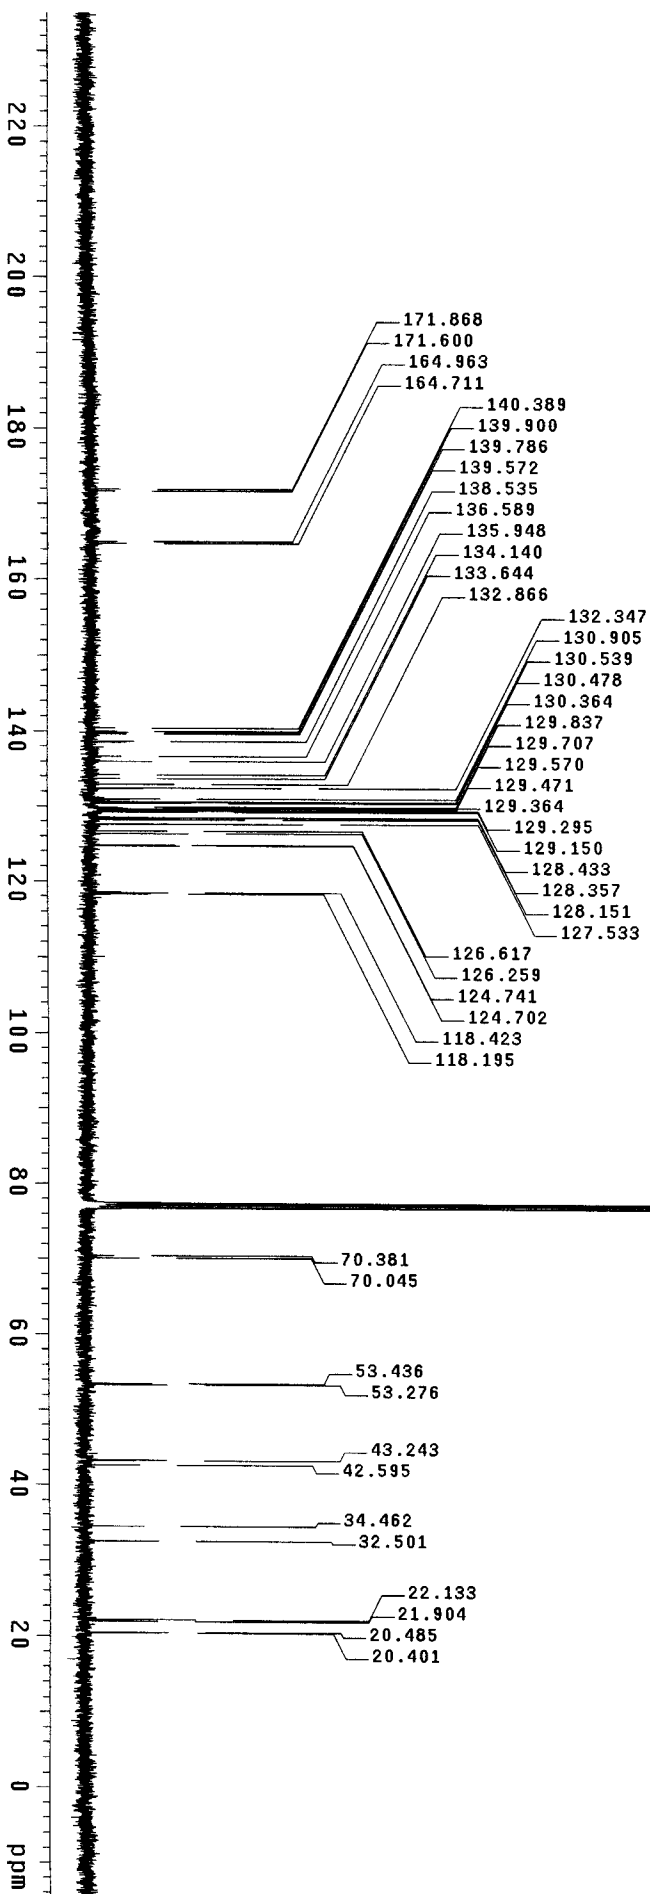

Project Name: Joe\_Chiral  
Reported by User: JOE

S60 *Breeze*

## SAMPLE INFORMATION

Sample Name: JCD-III-177-III-179AD-H  
Sample Type: Unknown  
Vial: 1  
Injection #: 1  
Injection Volume: 10.00 ul  
Run Time: 25.00 Minutes

Acquired By: JOE  
Date Acquired: 4/30/03 4:22:52 PM  
Acq. Method: 1% B  
Date Processed: 4/30/03 5:37:49 PM  
Channel Name: 2487Channel 1  
Sample Set Name: JOE

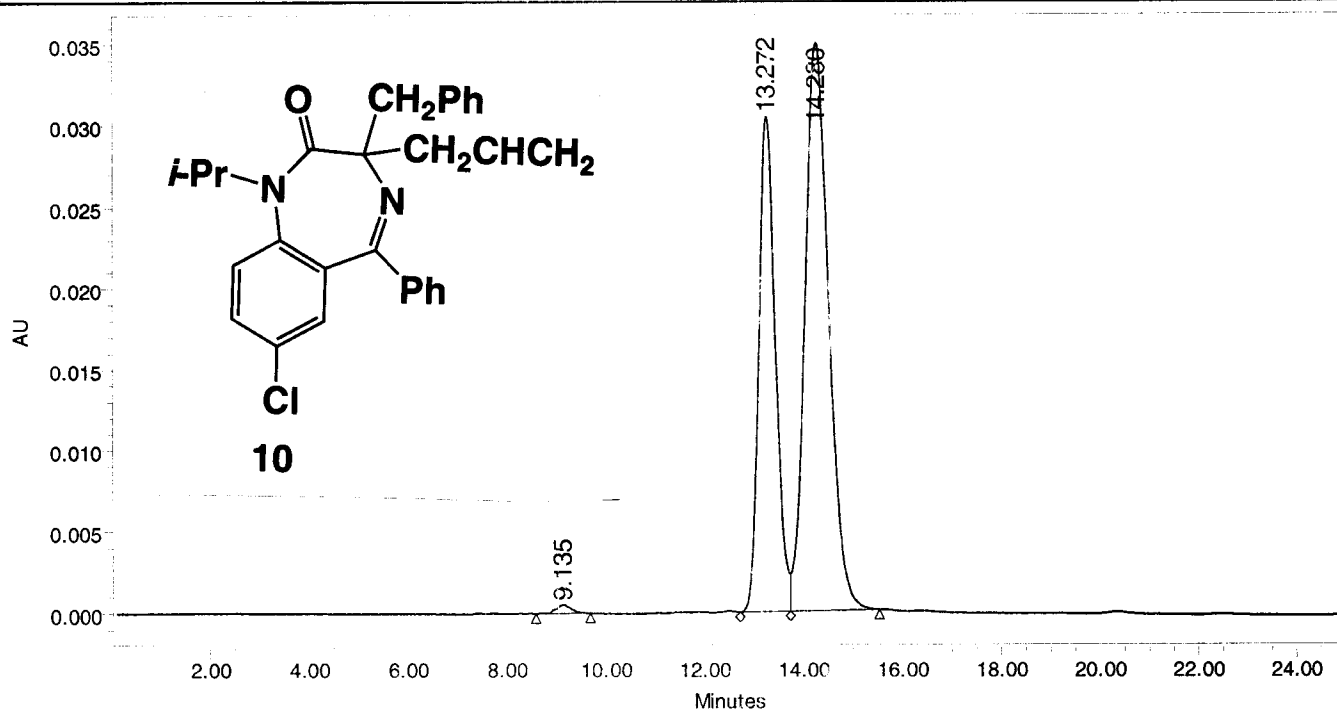

|   | RT<br>(min) | Area<br>( $\mu\text{V}\cdot\text{sec}$ ) | % Area | Height<br>( $\mu\text{V}$ ) | %<br>Height |
|---|-------------|------------------------------------------|--------|-----------------------------|-------------|
| 1 | 9.135       | 10899                                    | 0.58   | 520                         | 0.79        |
| 2 | 13.272      | 708235                                   | 37.75  | 30407                       | 46.21       |
| 3 | 14.280      | 1157119                                  | 61.67  | 34874                       | 53.00       |

Project Name: Joe\_Chiral  
Reported by User: JOE

S61 Breeze

## SAMPLE INFORMATION

Sample Name: JCD-III-179AD-H  
Sample Type: Unknown  
Vial: 2  
Injection #: 1  
Injection Volume: 10.00 ul  
Run Time: 25.00 Minutes

Acquired By: JOE  
Date Acquired: 4/30/03 5:21:44 PM  
Acq. Method: 1% B  
Date Processed: 4/30/03 5:52:05 PM  
Channel Name: 2487Channel 1  
Sample Set Name: JOE

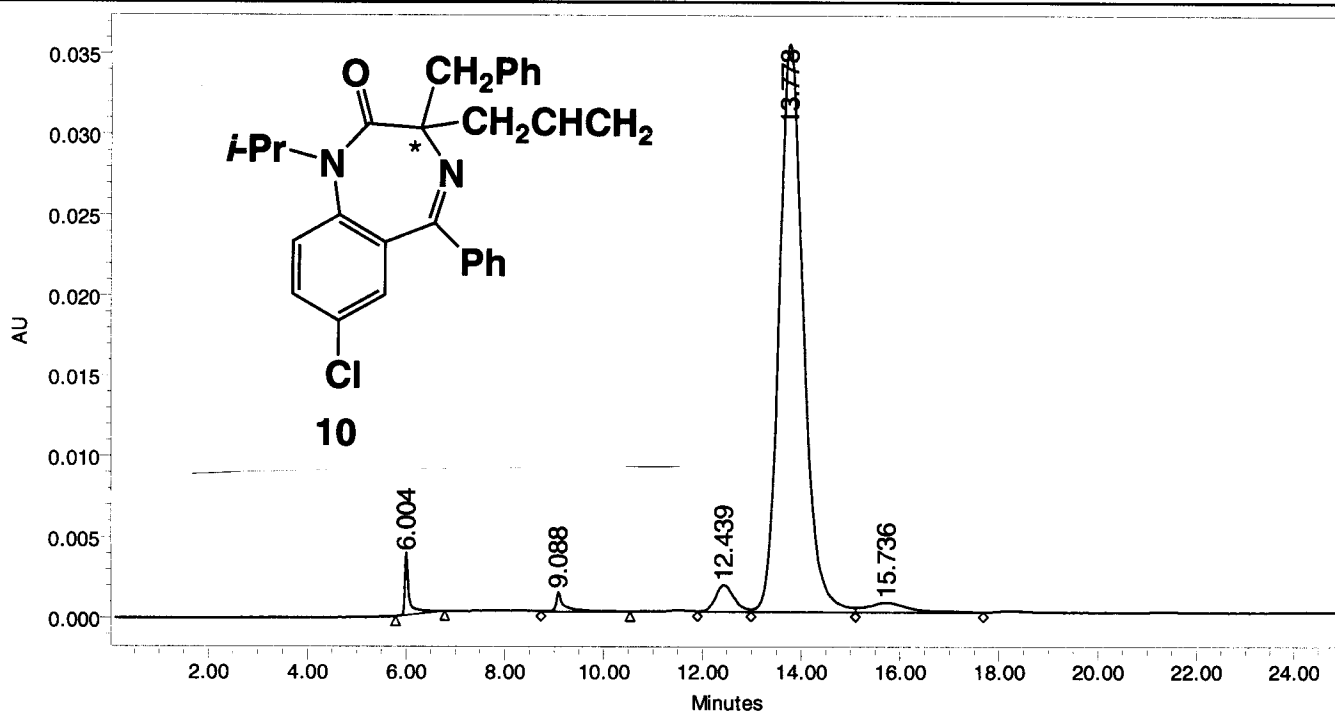

|   | RT<br>(min) | Area<br>( $\mu\text{V}\cdot\text{sec}$ ) | % Area | Height<br>( $\mu\text{V}$ ) | %<br>Height |
|---|-------------|------------------------------------------|--------|-----------------------------|-------------|
| 1 | 6.004       | 24358                                    | 1.85   | 3767                        | 8.87        |
| 2 | 9.088       | 14706                                    | 1.12   | 1173                        | 2.76        |
| 3 | 12.439      | 43734                                    | 3.32   | 1657                        | 3.90        |
| 4 | 13.778      | 1197978                                  | 91.00  | 35261                       | 83.05       |
| 5 | 15.736      | 35738                                    | 2.71   | 598                         | 1.41        |

8.9611

S 62

(Millions)

0 10.0 20.0 30.0 40.0 50.0 60.0 70.0 80.0 90.0 100.0

8.0

7.2455  
7.2363  
7.2235

7.0

6.0

5.0

4.0

3.3244  
3.0225  
2.9955  
2.8099  
2.7829  
2.5378  
2.5058  
2.5021  
2.4985  
2.4948  
2.4916

3.0

1.06128

1.04786

1

1.9859

2.0

1.2346  
1.1714

1.0

0

(R)- $\alpha$ -Methylphenylalanine

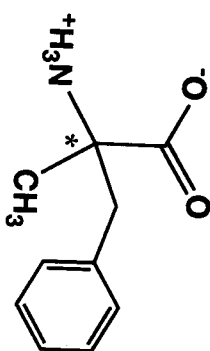

X : parts per Million : 1H

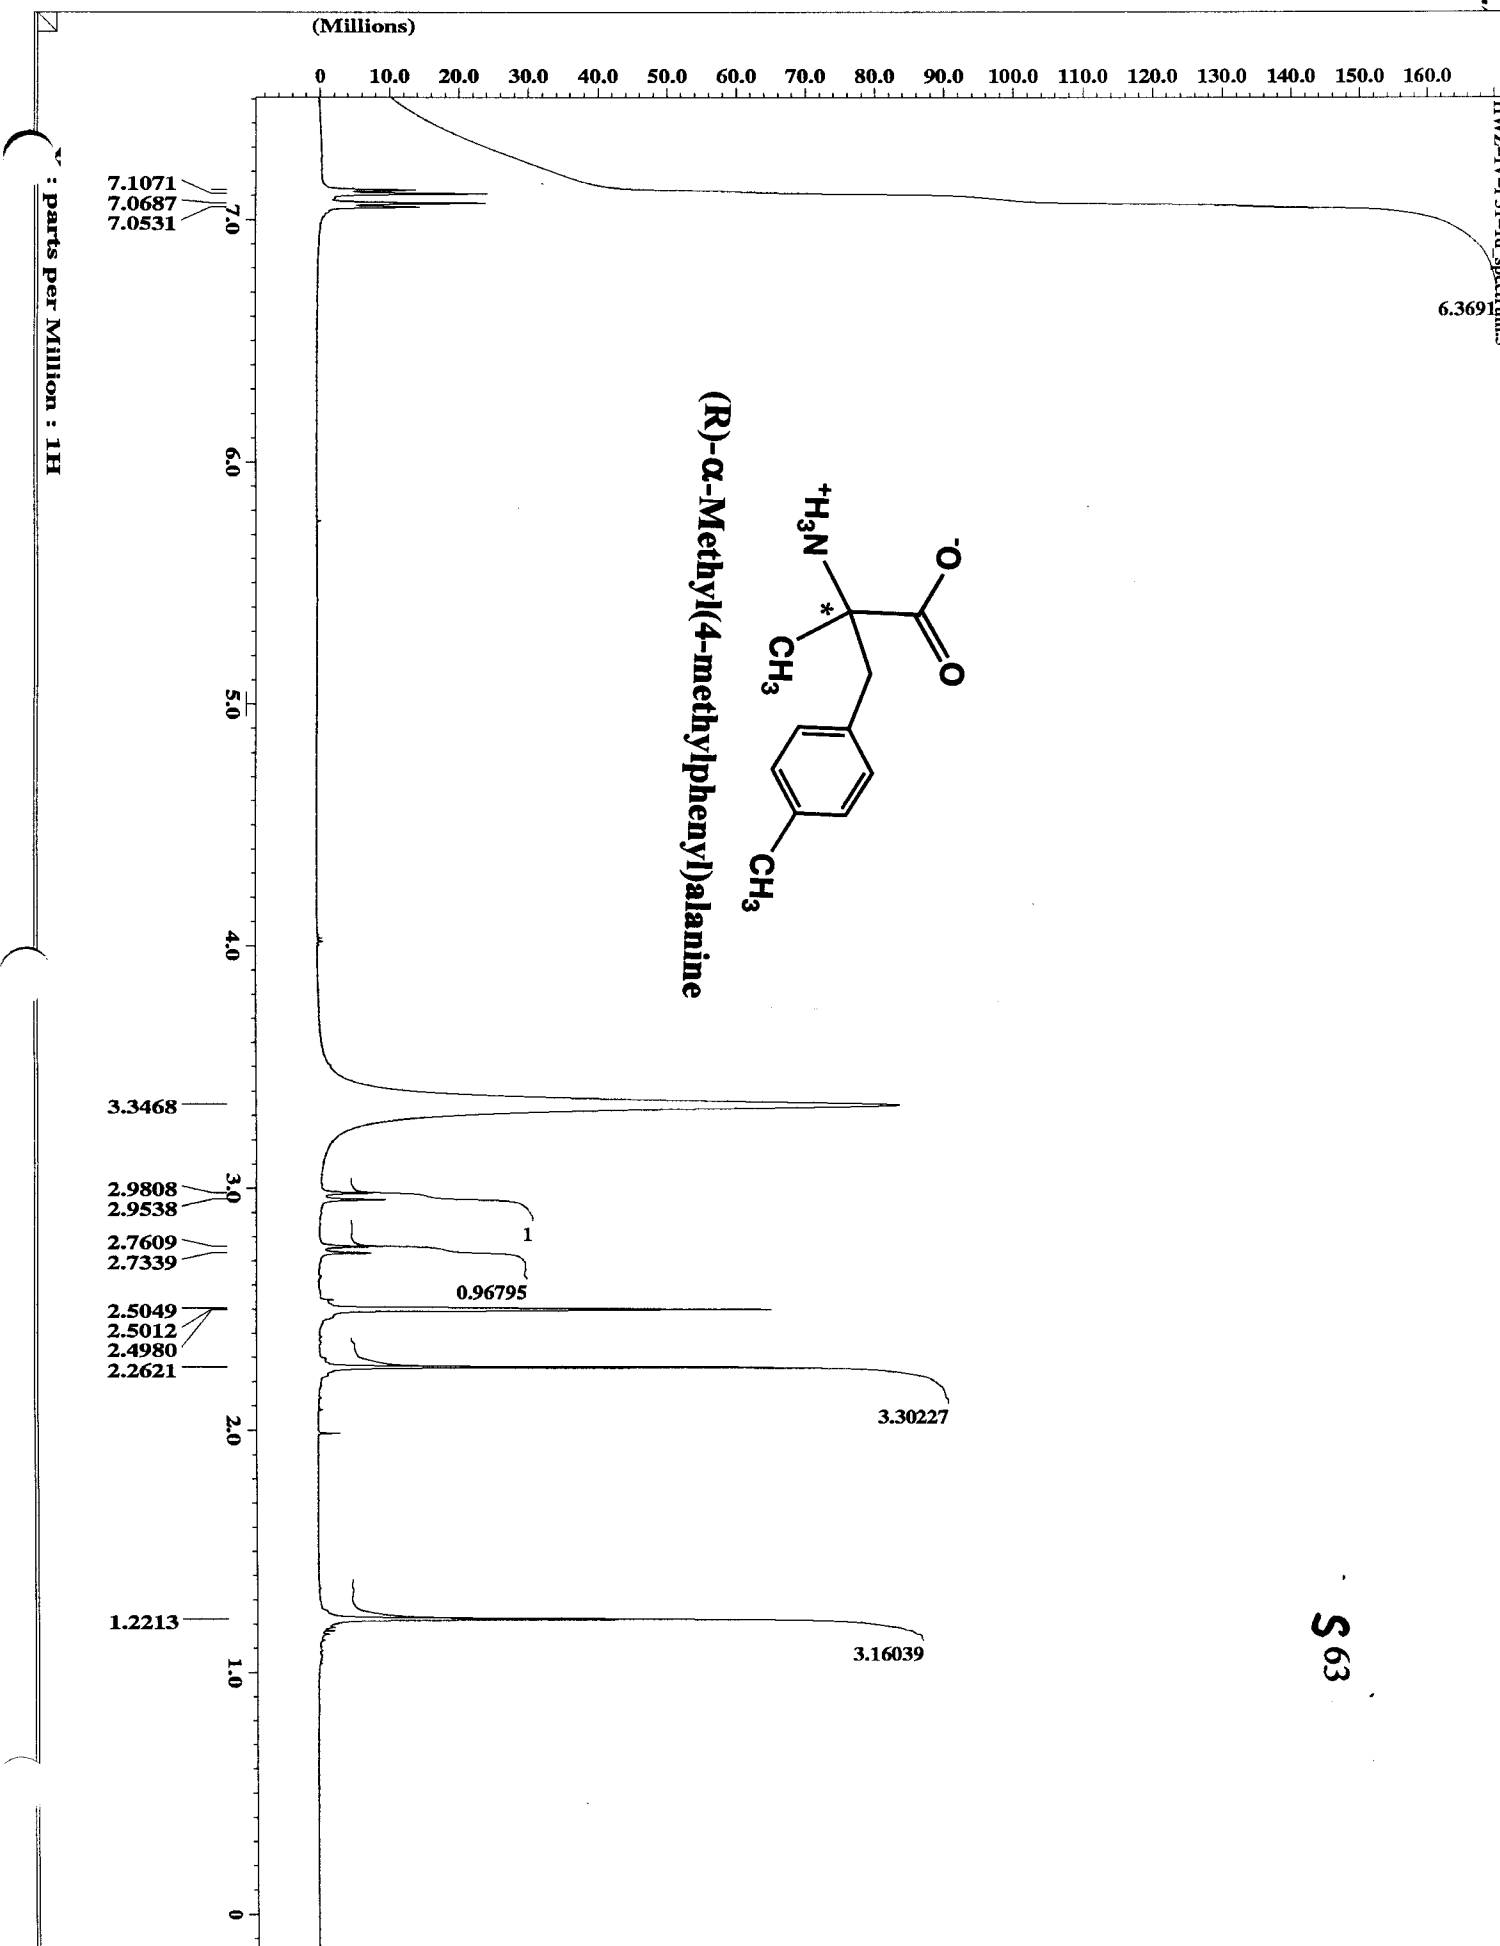

(Millions)

0 10.0 20.0 30.0 40.0 50.0 60.0 70.0 80.0 90.0 100.0 110.0

ICH-Xu-15-3-H-2-3-03.3

X : parts per Million : 1H

7.6059  
7.4827  
7.4217  
7.3860  
7.2669  
7.2614

1.94368

1.26725

4.95952

8.0

7.0

6.0

5.0

4.7567  
4.7356  
4.5611  
4.5469  
4.5331

1.0093

1.00762

4.0

3.7429  
3.7219

1.0

3.0

2.0

1.5112  
1.4979  
1.2652  
1.2217  
1.2075

2.99622

3.20934

1.0

0.0000

0.25235

0

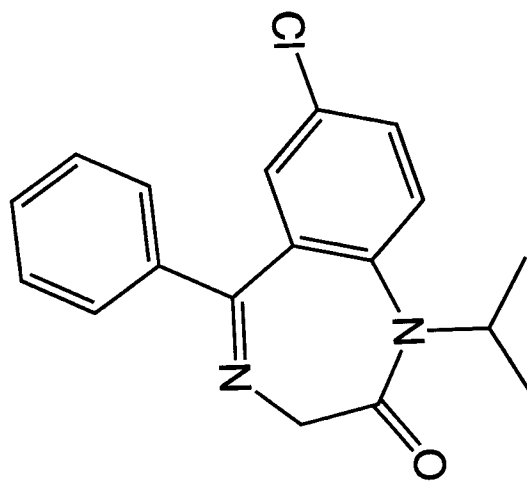

S64



(Millions)

0 10.0 20.0 30.0 40.0 50.0 60.0 70.0 80.0 90.0 100.0 110.0 120.0 130.0 140.0

X : parts per Million : 13C

169.5229  
168.6759

140.7248  
138.1609  
132.4379  
130.7592  
130.7210  
130.4234  
129.5535  
129.3094  
128.5921  
125.2346

77.3827  
77.1233  
76.8715

58.0466

51.0798

22.3886  
20.6182

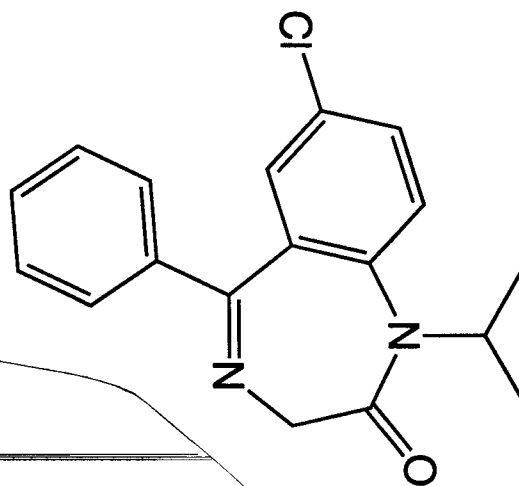

S65
